# Supplementary material
Source: PubMed Central journal article supplement (PMC2140110)
Supplement: 7601923s1.pdf [file 7601923s1.pdf]

## Supplemental Methods

### *Analysis of microarray data*

Raw CEL and DAT files were analyzed with dChip software (<http://biosun1.harvard.edu/complab/dchip/>) (Li and Hung Wong, 2001) after normalization. The entire experiment (microinjection, RNA extraction, and microarray analysis) was repeated three times and quantitative RT-PCR used to determine cut-offs (see below). Target genes were determined by comparing microarray and quantitative real-time RT-PCR (qRT-PCR) data. Candidates were preliminarily determined from microarray data based on the following criteria: i) expression, represented by model-based expression indices (MBEI), was increased more than 1.2-fold in DEX-treated groups ( $E/B > 1.2$ ), ii) MBEI differences were larger than 50 ( $E-B > 50$ ), iii) expression was claimed as “present (P)” in at least one sample in each experiment. Genes identified in at least two experiments were considered candidates. Genes induced in DEX-treated,  $\beta$ -galactosidase injected samples compared with the DEX-untreated, Ngnr1-GR or NeuroD-GR injected samples were also determined and excluded from analysis as they were regarded as DEX-induced. From Ngnr1 and NeuroD candidate target lists, we used qRT-PCR to determine fold-change cut-off values. We found that candidate genes showing  $E/B > 1.5$  and  $E-B > 70$  for Ngnr1 or  $E/B > 1.3$  and  $E-B > 50$  for NeuroD consistently showed more than 2-fold induction by qRT-PCR. Genes in the final list (Table I) showed at least 1.7-fold induction by Ngnr1 and at least 1.5-fold induction by NeuroD on average in microarray analysis (average fold change for three experiments). In general, fold change values determined by qRT-PCR were greater than those determined by microarray analysis, perhaps reflecting differences in sensitivity intrinsic to the two methods or conservative algorithmic calculation of fold changes by the dChip software. It is also notable that the genetic heterogeneity in *Xenopus laevis* animals, which are not inbred, could contribute to these fold change differences. Polymorphism in *Xenopus* animals may result in mismatches between mRNA sequences and probe sequences on the microarray and increase standard errors, which would lower the average fold change values. We also found that one known NeuroD direct target, Ebf3, was not included in our list, although its expression was highly induced as determined by qRT-PCR (data not shown). In looking at hybridization signals for perfect match (PM) and mismatch (MM) probes for Ebf3 on the array, we found that some MM probes showed higher intensity than PM probes and dChip claimed Ebf3 as ‘absent’. Therefore, some Affymetrix *Xenopus laevis* genome array probe sets may not be ideally designed and we believe that we missed at least some target genes in our study.

### ***Cloning of target promoter/enhancer regions, luciferase constructs, and mutagenesis***

To initially screen for putative regulatory elements, Dll1 (Delta-1), Ebf3, Elavl3, Gadd45 $\gamma$ , HEN1 (Nhlh1), and NeuroD4 (Ath3) genomic loci from various vertebrates were analyzed using the Evolutionary Conserved Region (ECR) Browser (<http://ecrbrowser.dcode.org/>) with default settings (Ovcharenko et al., 2004). For each gene, approximately 10 kb each of 5' and 3' flanking sequences, 5' and 3' untranslated regions (UTRs) and all introns were analyzed and ECRs usually containing 3 or more clustered, conserved E-boxes were chosen as putative enhancers. If multiple ECRs contained clustered E-boxes, 2-3 ECRs closest to the transcription start site (TSS) were selected. Putative enhancers were amplified with KlenTaqLA (DNA Polymerase Technology, Inc.) and mouse genomic DNA as a template. For Elavl3 promo, we replaced the pGL3-Promoter vector's SV40 promoter (Promega) with the Elavl3 gene fragment including its TATA and TSS (Xho I/Hind III). Enhancers lacking a TSS and TATA box were inserted into Nhe I/Hind III sites of the E1X3-TATA luciferase reporter plasmid (Huang et al., 2000) after removing this plasmid's E-boxes. Genomic sequences and TSS followed the Ensembl database and primer sequences (Fig. S1) were defined using Primer3 (Rozen and Skaletsky, 2000).

To determine Ngn and NeuroD consensus sites and Position weight matrix (PWM) files, we used CompareProspector (<http://CompareProspector.stanford.edu>) (Liu et al., 2004) and input 25 ECRs from human and mouse genomic loci for 14 Ngn and NeuroD targets (Ascl1, Dll1 (Delta-1), Ebf2, Ebf3, Elavl3, Gadd45g, HEN1 (Nhlh1), MTGR1, Myo10, MyT1, NeuroD4, Pou3f1, PDK2, and Znf238). For the second enhancer screen, we used this PWM and either the ECR Browser or the Enhancer Element Locator (EEL; available at <http://www.cs.helsinki.fi/u/kpalin/EEL/>) (Hallikas et al., 2006) to locate putative Ngn/NeuroD regulatory enhancers. Input sequences for each gene included 50 kb each of 5' and 3' flanking regions, the 5' and 3' UTRs, and all introns. Two or three putative regulatory elements with the highest EEL scores were PCR amplified and cloned as above. For sequences, see Fig. S2. Site-directed mutagenesis was performed with the QuikChange Site-Directed Mutagenesis protocol (Stratagene) using Pfu Turbo polymerase (Stratagene). All E-box sequences (CANNTG) were changed to CTCGAG, the Xho I restriction site. Mutants were selected by preliminary screening with Xho I digestion and sequence confirmation. For primer sequences, see Fig. S1.

### ***Transgenic Xenopus and morpholino oligonucleotides***

REMI transgenesis procedure was performed with minor modifications as described in (Taylor et al., 2006). Plasmids IS-EF1 $\alpha$ -eGFP and ISceI-pBS, which has two I-Sce I sites flanking the pBluescript II SK cloning site, were kindly provided by Drs. Pieler and Grammer.

Transgene constructs were generated by transferring the enhancer-luciferase cassette from luciferase reporter plasmids (see above) to the ISceI-pBS plasmid, using Not I/BamH I or Not I/Sal I sites. For SceI meganuclease transgenesis, we injected 80 pg of I-Sce I digested DNA with  $3 \times 10^{-3}$  units of I-Sce I (NEB Biolabs) in a 4 nl volume into each embryo. Injection was finished within 1 hr after fertilization and injected embryos were kept at 12.5 °C until 2-cell stage. Embryos were raised at 18 °C until st 26-27 and analyzed by in situ hybridization for luciferase expression. Results were consistent for REMI and SceI transgenesis, with the same constructs giving tissue localized or non-localized expression and the frequency of transgenesis was consistent with prior work. REMI gave high frequencies of transgenic embryos that expressed the reporter in the brain and eye, for example, NeuroD4 EEL4, 36%, n=103; MTGR1 EEL1, 29%, n=28; Dll1 EEL1, 57%, n=82; Ebf2 EEL3, 36%, n=42. By contrast, transgenic embryos carrying empty reporter constructs did not show localized transgene expression with either method (REMI transgenic embryos: TATA vector, 1.5%, n=66; pBS vector, 0%, n=31). The SceI method yielded 1-5% transgenic embryos per experiment. For SceI transgenesis, each construct was analyzed by injecting 100-350 embryos per experiment in 3-4 independent experiments.

To reduce *Ngnr1* activity in *Xenopus* embryos, we used a morpholino oligonucleotide (MO) directed against *Ngnr1* 5'-TGGTTAGCCCCAATGTTGCACTGAC, which was previously characterized for specificity and efficacy in suppressing neuronal differentiation (Klisch et al., 2006). As this MO appears to recognize only one *Xenopus* *Ngnr1* gene copy (*Ngnr1a*), we also used a second *Ngnr1* MO (5'-GGTATTCGCACTTCAGCAGCACCAT), which crosses the *Ngnr1* translation start and matches the sequence for both *Ngnr1a* and *1b* gene copies. Injection of either MO comparably reduced expression of *Ngnr1* target genes in *Xenopus* embryos, although the latter was somewhat more effective as expected. 20 or 40ng of each MO plus 30 pg  $\beta$ -galactosidase RNA was injected into 1 blastomere of 2-cell stage albino embryos and embryos were grown to st. 16-17 (Nieuwkoop and Faber, 1967), fixed, X-Gal stained and in situ hybridized as described (Seo et al., 2005).

### ***Chromatin immunoprecipitation (ChIP)***

Antibodies for ChIP were NeuroD (Santa Cruz sc-1084, after (Calella et al., 2007; Martin et al., 2003; Moates et al., 2003), Myc (9E10; Santa Cruz) or isotype matched IgG (Santa Cruz). For tissue ChIP, telencephalon tissue was dissected from e14.5 mouse embryos and 50-60 mg of material was immunoprecipitated with 5  $\mu$ g of NeuroD or isotype-matched IgG antibodies. Our tissue ChIP protocol was based on (Chen et al., 2004; Peng and Chen, 2005) and the Farnham

laboratory (<http://genomics.ucdavis.edu/farnham/protocol.html>) and Upstate protocols, with modifications in washing conditions as needed to minimize background and non-specific binding. To process individual samples, 50-60 mg of dissected brain tissue was minced into small pieces and immersed in 1% formaldehyde (in MEM media plus 5% fetal bovine serum) for 12 minutes to crosslink chromatin-bound proteins. Following crosslinking, tissue was disaggregated in ice cold 1X phosphate buffered saline (PBS) with a Dounce homogenizer, spun down briefly in a microfuge, and the cell pellet was then frozen at -80°C until further use. Subsequent steps for cell lysis, isolation and shearing of chromatin, and immunoprecipitation then followed the same protocol as described below.

For P19 ChIP, cells were transfected with 2 µg US2MT-mNeuroD in 100-mm dishes. Cells from a single 100-mm dish were crosslinked with 1% formaldehyde in MEM media plus 5% fetal bovine serum for 12 minutes, scraped from the dish, and re-suspended in 0.5 ml of Active Motif Lysis Buffer with 0.2% SDS or Missonix Lysis Buffer with 1 % SDS. After 30 min. incubation on ice, cell membrane was disrupted by vortexing. Nuclei were collected by centrifugation, washed with TE (tris-EDTA pH 8.0) and re-suspended in 1ml nuclei lysis solution (Tris pH 8.0 50mM, EDTA 10mM, SDS 0.01%). Chromatin was sonicated using a Branson Sonifier 250 at power 2.0, 20s X 20 times to shear chromatin into 250-500 bp fragments. After centrifugation to remove insoluble material, supernatant was aliquoted and stored at - 80 °C. For immunoprecipitation, 900 µl of lysate (approximately 30 µg of chromatin) was diluted in 100 µl of 10 X ChIP Dilution Buffer (Tris pH 8.0 500mM, EDTA 50mM, NaCl 1.5M, Sodium Deoxycholate 1 %, Triton X 100 10 %) and pre-cleared with 60 µl of Salmon Sperm DNA/Protein G agarose-50% slurry (Upstate) for 1 hr at 4 °C. After removing agarose by brief centrifugation, 5 µg of antibodies or normal mouse serum (Jackson ImmunoResearch Lab. Inc.) were added and incubated at 4 °C overnight. Immune complexes were collected with Protein G agarose for 1.5 hr at 4°C. Washing and elution was performed following Upstate ChIPkit protocol. DNA was purified with QIAquick PCR Purification columns and used for quantitative real-time PCR as above. Enrichment was calculated as the ratio of specific antibody to IgG after normalization with GAPDH. We initially designed quantitative ChIP primers for 10 enhancers, which showed robust induction by Ngn and NeuroD in luciferase assays (MTGR1 EEL1, MTGR1 EEL6, Ebf2 EEL1, Ebf2 EEL3, Ebf3 ECR1, Ebf3 ECR2, NeuroD4 EEL4, Zfp238 EEL1, Dll1 EEL1 and HEN1 promo) and one negative control (HEN1 ECR1), but primers for Dll1 EEL1 and HEN1 promoter region did not work (PCR products with smear or a wrong size). Results from the other 8 loci were shown in Fig.4 and Fig. S8.

### ***Genome-wide NeuroD target predictions***

Using the constructed Ngn/NeuroD binding profile, the potential Ngn/NeuroD transcriptional regulatory targets were predicted using a previously developed mammalian regulatory sequence analysis model (Chang et al., 2006). This model identifies all evolutionarily conserved transcription factor binding sites and performs enrichment analysis of these sites in a gene's proximal promoter sequence. Using this model, the genomic sequences of human, mouse, and rat were acquired from the NCBI's Genome Assembly Project. Orthologous gene groups were identified using the NCBI's HomoloGene database, and genomic sequences of the orthologous gene loci were aligned using the program TBA (Blanchette et al., 2004). The program PATSER (Stormo et al., 1982) was used to search for matches of the Ngn/NeuroD binding profile in the genomic sequence of each gene locus. Putative Ngn/NeuroD binding sites were searched in the 15 kb proximal promoter sequence and in the multi-species conserved sequences (MCSs) (Margulies et al., 2003) in the entire gene locus. Only Ngn/NeuroD binding sites that were conserved across human and rodents were considered. These sites were used to calculate the binding probability score for each gene using the previously described scoring formula (Chang et al., 2006). The P-value for observing a probability score or higher given the complete set of conserved Ngn/NeuroD binding sites in the genome was then calculated by permutations as follows. In each permutation, Ngn/NeuroD binding sites were randomly assigned to each gene according to the length of the genomic sequence of each gene. After each permutation, a new binding probability score was calculated according to the new binding site distribution. After all the permutations, the P-value of enrichment was calculated using the number of permutations in which a binding probability score higher than the true score was obtained. In this approach, genes with a very low P-value will have over-represented Ngn/NeuroD binding sites and are predicted as potential Ngn/NeuroD regulatory targets. In this study, 10,000 permutations were computed, and 0.01 was used as the P-value cutoff.

A similar analysis was performed using both the Ngn/NeuroD Position Weight Matrix (defined in this manuscript) as well as two divergent E-box binding profiles in the TRANSFAC database, c-Myc/Max (M00118, with a consensus sequence NNACCACGTGGTNN) and E-box (M01034, with a consensus sequence NCACSTGNCN). These two weight matrices are shown below.

c-Myc/Max (M00118)

|   |    |    |    |    |     |     |     |     |     |     |    |    |    |    |
|---|----|----|----|----|-----|-----|-----|-----|-----|-----|----|----|----|----|
| A | 25 | 28 | 70 | 10 | 0   | 100 | 0   | 0   | 0   | 0   | 2  | 6  | 18 | 31 |
| C | 31 | 7  | 3  | 69 | 100 | 0   | 100 | 0   | 0   | 0   | 19 | 21 | 47 | 13 |
| G | 13 | 47 | 21 | 19 | 0   | 0   | 0   | 100 | 0   | 100 | 69 | 3  | 7  | 31 |
| T | 31 | 18 | 6  | 2  | 0   | 0   | 0   | 0   | 100 | 0   | 10 | 70 | 28 | 25 |

E-box (M01034)

|   |    |     |     |    |    |     |     |    |    |    |
|---|----|-----|-----|----|----|-----|-----|----|----|----|
| A | 16 | 0   | 106 | 4  | 23 | 0   | 1   | 47 | 5  | 16 |
| C | 59 | 118 | 7   | 94 | 44 | 0   | 4   | 21 | 71 | 47 |
| G | 21 | 0   | 1   | 15 | 48 | 1   | 112 | 21 | 14 | 26 |
| T | 23 | 1   | 5   | 6  | 4  | 118 | 2   | 30 | 29 | 30 |

***GO term enrichment analysis***

The Gene Ontology (GO) term enrichment analysis was used to predict the function of a set of potential regulatory targets. For each Gene Ontology (GO) category, the number of potential regulatory target genes annotated by that GO category was counted, and the enrichment of that GO category in the predicted target genes was calculated using the hypergeometric distribution as shown below:

$$P - value = 1 - \sum_{i=0}^{k-1} \frac{\binom{M}{i} \binom{N-M}{n-i}}{\binom{N}{n}}$$

In the above formula,  $M$  is the total number of genes annotated by a GO category,  $N$  is the total number of annotated genes in the human genome,  $n$  is the total number of predicted target genes, and  $k$  is the number of predicted target genes that are annotated by that GO category.

## References

- Blanchette, M., Kent, W.J., Riemer, C., Elnitski, L., Smit, A.F., Roskin, K.M., Baertsch, R., Rosenbloom, K., Clawson, H., Green, E.D., Haussler, D. and Miller, W. (2004) Aligning multiple genomic sequences with the threaded blockset aligner. *Genome Res*, **14**, 708-715.
- Calella, A.M., Nerlov, C., Lopez, R.G., Sciarretta, C., von Bohlen Und Halbach, O., Bereshchenko, O. and Minichiello, L. (2007) Neurotrophin/Trk receptor signaling mediates C/EBPalpha, -beta and NeuroD recruitment to immediate-early gene promoters in neuronal cells and requires C/EBPs to induce immediate-early gene transcription. *Neural Develop*, **2**, 4.
- Chang, L.W., Nagarajan, R., Magee, J.A., Milbrandt, J. and Stormo, G.D. (2006) A systematic model to predict transcriptional regulatory mechanisms based on overrepresentation of transcription factor binding profiles. *Genome Res*, **16**, 405-413.
- Chen, S., Peng, G.H., Wang, X., Smith, A.C., Grote, S.K., Sopher, B.L. and La Spada, A.R. (2004) Interference of Crx-dependent transcription by ataxin-7 involves interaction between the glutamine regions and requires the ataxin-7 carboxy-terminal region for nuclear localization. *Hum Mol Genet*, **13**, 53-67.
- Hallikas, O., Palin, K., Sinjushina, N., Rautiainen, R., Partanen, J., Ukkonen, E. and Taipale, J. (2006) Genome-wide prediction of mammalian enhancers based on analysis of transcription-factor binding affinity. *Cell*, **124**, 47-59.
- Huang, H.P., Liu, M., El-Hodiri, H.M., Chu, K., Jamrich, M. and Tsai, M.J. (2000) Regulation of the pancreatic islet-specific gene BETA2 (neuroD) by neurogenin 3. *Mol Cell Biol*, **20**, 3292-3307.
- Klisch, T.J., Souopgui, J., Juergens, K., Rust, B., Pieler, T. and Henningfeld, K.A. (2006) Mxi1 is essential for neurogenesis in *Xenopus* and acts by bridging the pan-neural and proneural genes. *Dev Biol*, **292**, 470-485.
- Li, C. and Hung Wong, W. (2001) Model-based analysis of oligonucleotide arrays: model validation, design issues and standard error application. *Genome Biol*, **2**, RESEARCH0032.
- Liu, Y., Wei, L., Batzoglu, S., Brutlag, D.L., Liu, J.S. and Liu, X.S. (2004) A suite of web-based programs to search for transcriptional regulatory motifs. *Nucleic Acids Res*, **32**, W204-207.
- Margulies, E.H., Blanchette, M., Haussler, D. and Green, E.D. (2003) Identification and characterization of multi-species conserved sequences. *Genome Res*, **13**, 2507-2518.
- Martin, C.C., Svitek, C.A., Oeser, J.K., Henderson, E., Stein, R. and O'Brien, R.M. (2003) Upstream stimulatory factor (USF) and neurogenic differentiation/beta-cell E box transactivator 2 (NeuroD/BETA2) contribute to islet-specific glucose-6-phosphatase catalytic-subunit-related protein (IGRP) gene expression. *Biochem J*, **371**, 675-686.
- Moates, J.M., Nanda, S., Cissell, M.A., Tsai, M.J. and Stein, R. (2003) BETA2 activates transcription from the upstream glucokinase gene promoter in islet beta-cells and gut endocrine cells. *Diabetes*, **52**, 403-408.
- Nieuwkoop, P.D. and Faber, J. (1967) *Normal Table of *Xenopus laevis* (daudin)*. North-Holland Publishing Company, Amsterdam.
- Ovcharenko, I., Nobrega, M.A., Loots, G.G. and Stubbs, L. (2004) ECR Browser: a tool for visualizing and accessing data from comparisons of multiple vertebrate genomes. *Nucleic Acids Res*, **32**, W280-286.
- Peng, G.H. and Chen, S. (2005) Chromatin immunoprecipitation identifies photoreceptor transcription factor targets in mouse models of retinal degeneration: new findings and challenges. *Vis Neurosci*, **22**, 575-586.

- Rozen, S. and Skaletsky, H. (2000) Primer3 on the WWW for general users and for biologist programmers. *Methods Mol Biol*, **132**, 365-386.
- Seo, S., Richardson, G.A. and Kroll, K.L. (2005) The SWI/SNF chromatin remodeling protein Brg1 is required for vertebrate neurogenesis and mediates transactivation of Ngn and NeuroD. *Development*, **132**, 105-115.
- Stormo, G.D., Schneider, T.D., Gold, L. and Ehrenfeucht, A. (1982) Use of the 'Perceptron' algorithm to distinguish translational initiation sites in *E. coli*. *Nucleic Acids Res*, **10**, 2997-3011.
- Taylor, J.J., Wang, T. and Kroll, K.L. (2006) Tcf- and Vent-binding sites regulate neural-specific geminin expression in the gastrula embryo. *Developmental Biology*, **289**, 494-506.



## Supplemental Figure Legends

**Figure S1. Primer sequences used in this study.** (A-C) qRT-PCR primers for (A) *Xenopus* Ngn and NeuroD target genes, (B) their mouse orthologs, and (C) PAP-predicted Ngn/NeuroD target genes (mouse), to test induction by NeuroD. (D-F) Primers to clone enhancer fragments (mouse) for (D) ECR enhancers, (E) EEL enhancers, (F) Primers for site-directed mutagenesis of E-boxes in enhancer fragments, (G) Primers for chromatin immunoprecipitation experiments.

**Figure S2. Sequences of enhancers and E-boxes and position weight matrices.** (A) Sequences of functional (Ngn/NeuroD responsive) ECR and EEL enhancers, (B) sequences of non-functional ECR/EEL enhancers, (C) Types of E-boxes found in all ECR versus functional ECR, (D) Experimental and computationally-determined Position Weight Matrices, and (E) artificial enhancer sequences are shown.

**Figure S3. Ngn and NeuroD targets involved in cell migration and morphology.** Many Ngn and NeuroD target genes or highly related genes have known roles in regulating cytoskeletal rearrangement or migration/morphology in cells including neurons. *Xenopus* Unigene numbers, Gene names and symbols and known structural features and roles in regulating cell migration/morphology are listed.

**Figure S4. Expression profiles for Ngn/NeuroD target genes.** Gene expression profiles were obtained from the NCBI EST Profile viewer for mouse Unigene entries with the gene symbols shown. Transcript abundance is expressed as transcripts per million (TPM). Tissues with enriched (> than average) expression are shown in yellow for each gene. For each set of genes, tissues/regions where >50% of the surveyed genes had enriched expression are indicated in green while tissues/regions where 20-49% of the surveyed genes had enriched expression are indicated in orange. (A-B) Expression profiles of Ngn/NeuroD target genes from microarray. Profiles for 12 strongly Ngn/NeuroD-responsive genes (A) were compared to those of the 8 genes that did not respond to Ngn or NeuroD at all (B). Ngn/NeuroD-responsive genes generally have more neural-restricted expression (compare green/orange tissue locations in A versus B). (C-D) Similar results were obtained when comparing 9 NeuroD-responsive (C) and 9 non-responsive (D) target genes predicted as NeuroD targets by PAP (see text). (E-F) Summary of expression profiling data for 21 NeuroD responsive target genes (E) versus 17 non-responsive target genes (F).

**Figure S5. Identification of regulatory elements in Ngn/NeuroD target genes.** Putative regulatory elements (sequences in Fig. S2) were cloned into a minimal promoter luciferase construct, cotransfected with Ngn or NeuroD into P19 cells, and responsiveness measured by luciferase assay. Fold change values were normalized to luciferase activity in the absence of Ngn/NeuroD, arbitrarily defined as 1.

**Figure S6. Responsiveness of artificial enhancers to Ngn2 and NeuroD.** 10 artificial enhancer-luciferase reporter constructs were generated, each of which contained each 3 copies of a different E-box sequence, with the same intervening sequences used for all constructs (sequences in Fig. S2, section E). Upon cotransfection into P19 cells, the same 4 of these 10 artificial enhancer types (those with GA, GC, AA, or TA type E-boxes) could be activated by both Ngn2 and NeuroD.

**Figure S7. Analysis of E-box site frequency in Ngn/NeuroD target loci.** ECR Browser was used to perform pairwise cross-species comparisons of genomic sequences for 8 shared Ngn and NeuroD direct target loci (Dll1, Ebf2, Ebf3, Cbfa2t2h/MTGR1, MyT1, NeuroD4, Nhlh1, Zfp238). For each locus, sequences analyzed included locus/introns and 50kb each of 5' and 3' flanking sequences. Mouse was used as the base organism, with pairwise comparisons to corresponding human, opossum, dog, chicken, frog (*X. tropicalis*), fugu and zebrafish genomic sequences. In ECR Browser, rVista analysis of each syntenic pairwise alignment identified conserved E-boxes (CANNTG) of different types, where NN is (WA=T/A, A), AA, (GM=G, C/A), or TA.

**(A) Loci are preferentially enriched for GM-type sites.** Frequency of GM, WA, or TA type E-box sites was calculated as the sum of all pairwise comparisons of mouse genomic sequence to the syntenic genomic regions in other species (calculations and raw data shown in panel E). Frequency is expressed as a percentage of the total number of functional (e.g. Ngn2/NeuroD-responsive WA+GM type E-boxes) E-box sites present in all pairwise comparisons for that locus. Average=average frequency for all pairwise comparisons across the 8 loci. 69% of Ngn2/NeuroD-responsive functional (GM or WA) sites are the GM type, while 31% are the WA type. AA sites account for 22% and TA sites for 9% of the Ngn2/NeuroD-responsive E-boxes present in the loci.

**(B) GM type E-boxes are more frequently found in clusters than are WA E-boxes.** If multiple sites fell within a 1.5kb window in the >100kb of genomic sequence analyzed, these

sites were counted as being clustered. Frequency of clustered sites is represented relative to the sum of functional (GM+WA) E-boxes for each locus.

**(C) Quantitation of E-box frequencies.** Raw numerical data and site frequency calculations for pairwise comparisons of each locus are shown.

**Figure S8. Chromatin immunoprecipitation of Ngn2 and NeuroD at enhancers.** Ngn2 and NeuroD binding to EEL and ECR enhancers was analyzed by ChIP in P19 cells, following transfection of Myc-tagged Ngn2 and NeuroD. Fold-enrichment is expressed as a ratio of specific (Myc) to non-specific (IgG) immunoprecipitation after normalization with GAPDH.

**Figure S9. Computational genome-wide prediction of Ngn/NeuroD target genes.**

**(A) Ngn/NeuroD target genes predicted by PAP in a genome-wide computational screen.** The PAP program was used in combination with our position weight matrix for Ngn/NeuroD binding (Fig. 3G) for genome-wide prediction of Ngn/NeuroD targets. Annotated genes were scored based on their enrichment for Ngn/NeuroD binding sites conserved between human and mouse (h/m) or human, mouse and rat (h/m/r) and using a cut-off value of  $P < 0.01$  (see Supplemental Methods). 347 Ngn/NeuroD targets were predicted in both h/m and h/m/r comparisons (intersection). PAP predicted many of our Ngn and/or NeuroD targets defined on the microarray, as shown at bottom for the h/m and h/m/r based analyses and intersection between the two.

**(B-C) PAP predicted target genes for the M01034 and c-Myc/Max E-boxes.** To test the specificity of the PAP predictions for Ngn/NeuroD, PAP analysis was also performed for two E-boxes in TRANSFAC that are diverged from the NeuroD PWM, E-box M01034 (B) and c-Myc/Max, M00118 (C). These CACGTG-type E-boxes did not respond to Ngn or NeuroD in our prior assays. PAP predicted 365 (B) and 127 (C) target genes for these matrices respectively.

**Figure S10. Functional clustering of PAP-predicted target genes.**

(A-C) PAP predicted target genes for the matrices above were analyzed by functional clustering and top-ranking Gene Ontology (GO) terms are shown. (A) For Ngn/NeuroD targets, nervous system development (green) was the top-ranked GO term. This was not found as a highly ranked GO term for either of the other matrices, which had development (yellow) and cell cycle (pink) as top GO terms (B-C).

(D) Ngn/NeuroD target genes in the nervous system development and development functional clusters are listed. Yellow indicates overlap with development cluster genes predicted as targets using the other E-boxes.

(E-F) M01034 E-box (E) and Myc/Max (F) target genes in top-ranked clusters (development and cell cycle) are listed.

Seo\_Supplemental Figure S1. Primer sequences.

A. Primers for qRT-PCR of *Xenopus* genes (*Ngnr1* and *NeuroD* target confirmation)

|    | gene          | direction | sequence               | Product size | UniGene number    |
|----|---------------|-----------|------------------------|--------------|-------------------|
| 1  | xEf1alpha     | F         | CACCATGAAGCCCTTACTGA   | 149          | XI.17432          |
|    |               | R         | ACCTGTGCCGGTAAAGAACC   |              |                   |
| 2  | xEbf2         | F         | GTCCTCTCCACCACAGTGAA   | 148          | XI.547            |
|    |               | R         | CACTTGACTGATGGCTTTG    |              |                   |
| 3  | xEbf3         | F         | TACAGCAGGGGTAGTGGATG   | 103          | XI.632            |
|    |               | R         | ATTGGATTTCTGAGGTTGG    |              |                   |
| 4  | xDelta-1      | F         | GCACTACCAGAGCAACGTGT   | 90           | XI.54916          |
|    |               | R         | GGAACAACGAAGGAGTTGGT   |              |                   |
| 5  | xMyT1         | F         | TTGGGATGGTCCCATAGACT   | 138          | XI.57163/XI.31433 |
|    |               | R         | TCTTGATCTCCTGCATCTC    |              |                   |
| 6  | xPOU50        | F         | GGACCTCAGGCTTCTCTTT    | 138          | XI.1274/XI.21449  |
|    |               | R         | GCTAGGGGCATCTTCATCTG   |              |                   |
| 7  | xZnf238(RP58) | F         | CGGAGAGGCTGAAACACAC    | 139          | XI.23642          |
|    |               | R         | CACAGAGAGGTCCAGCACAC   |              |                   |
| 8  | Xash1         | F         | CCCCAACTATCCACGATA     | 144          | XI.450            |
|    |               | R         | TGCTACTCCGCATCTCAGAA   |              |                   |
| 9  | xTwist        | F         | GAGGCGATCTGCTAGGAAAA   | 121          | XI.879            |
|    |               | R         | CCTCTGACTCTGCAGCTCCT   |              |                   |
| 10 | xFRP          | F         | GTGACCCCTGTGTAAGGAA    | 140          | XI.3150           |
|    |               | R         | GAGAAGGAGGAGCCTGGTG    |              |                   |
| 11 | xlro3         | F         | GAGCCTTCTGCCCTACAG     | 125          | XI.4522           |
|    |               | R         | GGGATAAAAAGGCTGGTGTA   |              |                   |
| 12 | xPlx3         | F         | GACTGCATGACTGCTTCTGG   | 124          | XI.16835          |
|    |               | R         | CCCAGACAAAATGCTCAGGT   |              |                   |
| 13 | xMTGR1        | F         | CAAAACCACTACCCCCATCT   | 143          | XI.4960           |
|    |               | R         | CAGCAGTGACAGAAGCAGGT   |              |                   |
| 14 | xGadd45       | F         | TGACTGGGTTCCCACTATCA   | 145          | XI.12125/XI.16395 |
|    |               | R         | GGACCTCAACCAGCGTAATC   |              |                   |
| 15 | xEI-C         | F         | GCTTTCTATCCTCCCCAGGT   | 147          | XI.1035           |
|    |               | R         | TGCCACAGGACACTCTCATC   |              |                   |
| 16 | xAth3         | F         | CATTCAGGTCCCCCTATCC    | 123          | XI.1263           |
|    |               | R         | GGTGTGGGTAAGGCTCGTAA   |              |                   |
| 17 | xDelta-2      | F         | CTTCCGTGTGTCTCAAGC     | 139          | XI.68             |
|    |               | R         | ATGGAAGGGACACGAATTG    |              |                   |
| 18 | xB4galT3      | F         | GCCAGAGAGCTGGAACATCT   | 134          | XI.71386          |
|    |               | R         | GTGCTGCTCGTCTTGTGGAC   |              |                   |
| 19 | MTGR1b        | F         | CTGTGGCCAAAGCATTGATA   | 150          | XI.16456          |
|    |               | R         | GCAGTGACAGAAGCAGGTGT   |              |                   |
| 20 | CIDE-c        | F         | CCTCTCCCCCAAGTCTCTCT   | 133          | XI.15305          |
|    |               | R         | AATGCCTTTCTGAGACTGC    |              |                   |
| 21 | Hes-6         | F         | TTTCTGGGATCCTCCTCTGA   | 138          | XI.9030           |
|    |               | R         | CCATGGTCTCCACATAGCAG   |              |                   |
| 22 | xl.6849       | F         | GGCAGAGTGTAAGGGACACAC  | 139 bp       | XI.6849           |
|    |               | R         | GCTCACCTTTTCTGTTTCT    |              |                   |
| 23 | xScamp2       | F         | ACTGTCCGTCTCCTCGTCT    | 123 bp       | XI.45029          |
|    |               | R         | CATGGTTGCCAGTTGTAATTTG |              |                   |
| 24 | xl5263        | F         | AGTGAGCCCAGACCAGAAGAT  | 127 bp       | XI.5263           |
|    |               | R         | CCATTTTACCCCATATCCAC   |              |                   |
| 25 | xRgc32        | F         | TGATATGCTGTGACACCGAAG  | 146 bp       | XI.5886           |
|    |               | R         | TATCAGCCGCTTCTCACTCAT  |              |                   |
| 26 | XI.7910       | F         | AGAACCTGAGCCGACTAGGAG  | 138 bp       | XI.7910           |
|    |               | R         | CTTGGGCTGTCCATCAGTAG   |              |                   |
| 27 | xGas6         | F         | CTTCTTCTCACCTCCTGGTT   | 141 bp       | XI.4807           |
|    |               | R         | CCTTTCCAAGTGCCCTGTTT   |              |                   |
| 28 | xLims1        | F         | TTCGGAAGACTGCTCCAAAT   | 130 bp       | XI.8188           |
|    |               | R         | GTAATACTCTCCACCCAAAC   |              |                   |
| 29 | XI.24399      | F         | GTGCTCGAGTTCTTCTGGT    | 106          | XI.24399          |
|    |               | R         | ACACCTGTCCGGCTACATTC   |              |                   |
| 30 | XI.34         | F         | GTGCAAGCTCAGCAGTATC    | 151 bp       | XI.34             |
|    |               | R         | AGCCAAGGATACAAGGATGG   |              |                   |
| 31 | xPrickle      | F         | CTGGCAGATGAACCATTTCT   | 138 bp       | XI.7556           |
|    |               | R         | TCCCCACAGGATTCACAGTA   |              |                   |
| 32 | XI.51207      | F         | GGTTTTCTGCTGGAGTGGAT   | 149 bp       | XI.51207          |
|    |               | R         | GTACAGCAACCCTCCACCTT   |              |                   |
| 33 | xPDK2         | F         | GCACTGAAGCAGATGATTGG   | 133 bp       | XI.1717           |

|    |            |                     |                      |        |          |
|----|------------|---------------------|----------------------|--------|----------|
|    | R          | GGTAGTGGTCTGGGAGAAA |                      |        |          |
| 34 | x1419      | F                   | GGATTGAGCAAGAGCACTG  | 149 bp | XI.1419  |
|    |            | R                   | TCAGGGTTGAGCAAATCAA  |        |          |
| 35 | xESR7      | F                   | CTACGAAAGCCAGTTGTGGA | 124 bp | XI.586   |
|    |            | R                   | CAGCCTTCTCCAGCTTCC   |        |          |
| 36 | xNeuroD    | F                   | GAGCAGAGTCAGGACATCCA | 139bp  | XI.330   |
|    |            | R                   | GCTTGACGTGGAATACATGG |        |          |
| 37 | xgng-13    | F                   | ACGCTACCTTACCGGCCTAT | 103 bp | XI.21807 |
|    |            | R                   | TTTGATGAGGGTGGGCTTAG |        |          |
| 38 | xCalponin2 | F                   | GACCCCAAGAACAATCCT   | 139 bp | XI.554   |
|    |            | R                   | CAGTCCAGACTTGGTGTCG  |        |          |
| 39 | xRiddle2   | F                   | ATGTAAGCTGGGATGCCACT | 104 bp | XI.6174  |
|    |            | R                   | TGTTCTCAGGGCAGGAGACT |        |          |
| 40 | xAngio1    | F                   | ATTGTCCATTGCTTTCCAG  | 116 bp | XI.23649 |
|    |            | R                   | TCACGCAGAATCAGACTTGG |        |          |
| 41 | XI.8921    | F                   | GTCACCGGAGTACCAAAGGA | 96 bp  | XI.8921  |
|    |            | R                   | TCTTGGTGGTGCAGTCCATA |        |          |
| 42 | XI.4183    | F                   | CCAGAGCCTGAGAAGAATGG | 123 bp | XI.4183  |
|    |            | R                   | GGTTTGTGTCCAGCGGTAAT |        |          |

### B. qRT-PCR primers for mouse genes

|    |                |                        |     |           |
|----|----------------|------------------------|-----|-----------|
| 1  | F-mRPL19       | TCAGGCTACAGAAGAGGCTTGC | 160 | Mm.218350 |
|    | R-mRPL19       | ACAGTCACAGGCTTGCGGATG  |     |           |
| 2  | F-mAscl1       | GCCAACAAGAAGATGAGCAA   | 148 | Mm.136217 |
|    | R-mAscl1       | TGGAGTAGTTGGGGGAGATG   |     |           |
| 3  | F-mAth3        | TCTGGGCCTTGTCTGAAAGTC  | 145 | Mm.10695  |
|    | R-mAth3        | TCCAGGAGGGTAGATTGAGG   |     |           |
| 4  | F-mDelta1      | TCCGATACCCAGGTTGTCTC   | 93  | Mm.4875   |
|    | R-mDelta1      | GGTCTTGGTTGCAGAAAAGG   |     |           |
| 5  | F-mMyT1        | CCCAGCAGCTCTATGACCTC   | 111 | Mm.130005 |
|    | R-mMyT1        | CTCAGGCTCTTCTCTCGAA    |     |           |
| 6  | F-mElavl3      | AAGCCATCAACACCCTCAAT   | 148 | Mm.347707 |
|    | R-mElavl3      | AGCTGCTCCATCTCCTTCTG   |     |           |
| 7  | F-mMTGR1       | TTCGTCCATTTGTGATTCCA   | 142 | Mm.29914  |
|    | R-mMTGR1       | GCGATACTGGTGTGAGCAG    |     |           |
| 8  | F-mEbf3        | CTTAATGGCTCCTCCGCTAA   | 104 | Mm.258708 |
|    | R-mEbf3        | CCGTGTGTGCTGCTACAGTT   |     |           |
| 9  | F-mTwist1      | GAGCAAGATTCAGACCCTCAA  | 147 | Mm.3280   |
|    | R-mTwist1      | ATCCTCCAGACGGAGAAGG    |     |           |
| 10 | F-mHEN1(Nhlh1) | CCCCCTGTCAACATACATTA   | 150 | Mm.2474   |
|    | R-mHEN1(Nhlh1) | GCCGGAACAACCTCTCTGAAG  |     |           |
| 11 | F-mOct6        | CAAGCAGTTC AAGCAACGAC  | 96  | Mm.297371 |
|    | R-mOct6        | GTCTGCCAGAAACAGTTACC   |     |           |
| 12 | F-mBmn2        | AAGTGGTTGGAAGAGGCAGA   | 148 | Mm.129387 |
|    | R-mBmn2        | GCTTAGGGCATTGAGGAAA    |     |           |
| 13 | F-mHes5        | TGAAACACAGCAAAGCCTTC   | 112 | Mm.137268 |
|    | R-mHes5        | GTGCAGGGTCAGGAACTGTA   |     |           |
| 14 | F-mBTBD6       | TACCAAGGAGGCTGTGGTCT   | 134 | Mm.18396  |
|    | R-mBTBD6       | TTGGAATTCGGACCAGGTAG   |     |           |
| 15 | F-mIrx3        | AAACTAGCGACTCGGACGAC   | 120 | Mm.238044 |
|    | R-mIrx3        | AGGGTGGAGAAGGTGGAGAT   |     |           |
| 16 | F-mPlk3        | AAGCCACTGACACCGAGTCT   | 134 | Mm.259022 |
|    | R-mPlk3        | GATATGGCGGTGCTGTAGGT   |     |           |
| 17 | F-mRgc32       | AGCACCTAGAGCGCATGAA    | 149 | Mm.29811  |
|    | R-mRgc32       | AGCTGGAGAGGAGTTGGTTG   |     |           |
| 18 | F-mSAT1        | CGGAAACGAATGAGGAA      | 147 | Mm.379009 |
|    | R-mSAT1        | GATCAGTCGCAGGATGTCAC   |     |           |
| 19 | F-mGadd45g     | CTGCCTTGAGAAAGCTCAGT   | 119 | Mm.281298 |
|    | R-mGadd45g     | CACCAAGTCGATCAGACCAA   |     |           |
| 20 | F-mPDK2        | GACGTATCGGGTCAGCTAGG   | 132 | Mm.29768  |
|    | R-mPDK2        | ATCAGGGAGACCCAGTTTCA   |     |           |
| 21 | F-mPrickle1    | CAAGCCCCACACATACCTCT   | 109 | Mm.150314 |
|    | R-mPrickle1    | CTCATCGCGTGGACATTCT    |     |           |
| 22 | F-mSlc7a7      | CATGGTCAACAGCACCAAGT   | 139 | Mm.142455 |
|    | R-mSlc7a7      | GAGACACACGCCATTAAGCA   |     |           |
| 23 | F-mXL21239     | AATGCAGTTGATGGGGTAGC   | 127 | Mm.130063 |
|    | R-mXL21239     | ACTCCTTGCACTGGTTGGTT   |     |           |
| 24 | F-mCidec       | TGTTTCATGGTCTGCTGAAG   | 149 | Mm.10026  |
|    | R-mCidec       | GTCCTGAGGGTTCAGCTTGT   |     |           |

|    |                |                       |     |           |
|----|----------------|-----------------------|-----|-----------|
| 25 | F-mB4GalT3     | CCAGTACTTTGGCGGAGTTT  | 115 | Mm.274011 |
|    | R-mB4GalT3     | GACCCCTGGTAGCAATGTCGT |     |           |
| 26 | F-mSIP1        | GAACCCATTTAGTGCCAAAGC | 119 | Mm.259595 |
|    | R-mSIP1        | GTCCTGGGTATGGTCGTAGC  |     |           |
| 27 | FmRP58(Zfp238) | AGACTGTGTATCGGCAGCAG  | 83  | Mm.330700 |
|    | RmRP58(Zfp238) | AACAGTGTGCAAAACGCTTC  |     |           |
| 28 | FmEbf2         | AGGATACATCCGCAACACAA  | 108 | Mm.319947 |
|    | RmEbf2         | CTGTAGCCGTTTCATGCTGTT |     |           |
| 29 | FmSlc43a2      | ACACTGGAGCCCATACTTCC  | 97  | Mm.11186  |
|    | RmSlc43a2      | AGTGGGAGGTTCACTTGTCC  |     |           |
| 30 | F-mAmotl2      | CCAGCTATGGTGTCTGTGG   | 106 | Mm.21145  |
|    | R-mAmotl2      | CACCTCCAAGGATTCAAGT   |     |           |
| 31 | F-mMyo10       | GCTGGAGAGGTGCAGTATGA  | 132 | Mm.60590  |
|    | R-mMyo10       | GCTGGAGACGTGTCAAAGA   |     |           |

**C. qRT-PCR primers for PAP-predicted target genes (mouse)**

|    |            |                       |     |           |
|----|------------|-----------------------|-----|-----------|
| 1  | FmAtoh8    | AGGTGCCGTGCTACTCCTAT  | 129 | Mm.87449  |
|    | RmAtoh8    | AGCTGAGGTTGCTGTGGTC   |     |           |
| 2  | FmDCX      | ACAGTGCTCAAGCCAGAGAG  | 134 | Mm.12871  |
|    | RmDCX      | GACCTGCTCGAAAGAGTGG   |     |           |
| 3  | FmEPHB2    | TGCTGAAGAAGTGGATGTGC  | 144 | Mm.250981 |
|    | RmEPHB2    | AAGGTTCTGATGGACAACC   |     |           |
| 4  | FmNCAM1    | TCCTCCTTGACCCTGAAGAG  | 150 | Mm.4974   |
|    | RmNCAM1    | CCAGGTGTAGACAGCCACAG  |     |           |
| 5  | FmROBO1    | CACAGGAACAGCCAAATGAC  | 150 | Mm.310772 |
|    | RmROBO1    | AACTGGGGTCTCTAGGGTTG  |     |           |
| 6  | FmSema3a   | CGGCAATGGAGCTTTCTAC   | 147 | Mm.372039 |
|    | RmSema3a   | CATCCCAGGCACAGTAAGG   |     |           |
| 7  | FmSli3     | AGGTCAATGGCTACACATGC  | 115 | Mm.202457 |
|    | RmSli3     | TTCTGGCACTCGTACTGGTC  |     |           |
| 8  | FmSyn3     | AGGCTCTGCTATGCTGGAG   | 133 | Mm.430741 |
|    | RmSyn3     | ATAATCTCTGCCGTCCTTGC  |     |           |
| 9  | FmDCC      | ACAAGACCTCAACCCACTCC  | 111 | Mm.167882 |
|    | RmDCC      | GCCGAGCATCTGTAGACTCC  |     |           |
| 10 | FmSli2     | GCTGGGGTTAGTGTGTGCG   | 150 | Mm.289739 |
|    | RmSli2     | AAATCCAGTCTCTCGGTGTTG |     |           |
| 11 | FmEPHA3    | GGAATGTCAGGCAGTGTGAG  | 110 | Mm.1977   |
|    | RmEPHA3    | GTTGGTGTGAGCTAGGAGGTC |     |           |
| 12 | FmEPHB1    | ACCTCAGACCCACCTACAC   | 129 | Mm.22897  |
|    | RmEPHB1    | CCACATGACAAATCCCATAGC |     |           |
| 13 | FmSynpr    | GCTGGCATTCTCTGGAC     | 171 | Mm.317515 |
|    | RmSynpr    | TGGGACCACTAGGCTGTTG   |     |           |
| 14 | FmSema3g   | ATAACTCTGACCCGGACGAC  | 154 | Mm.27812  |
|    | RmSema3g   | CTCCATTTGTTCAACCAGCAC |     |           |
| 15 | FmEya1     | ATCCACAGTCTTCCACACC   | 150 | Mm.250185 |
|    | RmEya1     | CAGGTCCCAGATGAACACTC  |     |           |
| 16 | FmSyt1     | TTTTGACCGCTTCTCCAAG   | 170 | Mm.289702 |
|    | RmSyt1     | CGGCAGTAGGGACGTAGC    |     |           |
| 17 | FmSema6d   | GACCTCCATCGACTTCCAG   | 111 | Mm.330536 |
|    | RmSema6d   | ACCCGTGTCTTTGTGAACC   |     |           |
| 18 | FmWnt10a   | CTCGGAACAAAGTCCCCTAC  | 133 | Mm.5130   |
|    | RmWnt10a   | GCCTTCAGTTTACCAGAGC   |     |           |
| 19 | FmST18     | AGGGCTCTACCCTCACCAC   | 149 | Mm.234612 |
|    | RmST18     | GAGTGTTCGATTGCTGTTC   |     |           |
| 20 | FmPhf17    | AAGAAAGCGGAGCTATGAA   | 140 | Mm.286285 |
|    | RmPhf17    | CTGCTGGGAATGTGAGACAC  |     |           |
| 21 | FmNrxn1    | GTGAACCATACCCAGGCTCT  | 113 | Mm.312068 |
|    | RmNrxn1    | GGCATAGAGGAGGATGAGGA  |     |           |
| 22 | FmCrta1    | AGCGCAGCTCACCCCTACTAT | 127 | Mm.313558 |
|    | RmCrta1    | CCTGAGAAGGCGTTATTGGT  |     |           |
| 23 | FmOd2      | CCTATGCCAACACCACAAAG  | 144 | Mm.339846 |
|    | RmOd2      | GAGCACTGTTCTCTGGGTTT  |     |           |
| 24 | FmCacna2d3 | GCCCCTATTGAAGCCTATTG  | 145 | Mm.386754 |
|    | RmCacna2d3 | CCTGATTGGTGAGTTGTTTCG |     |           |
| 25 | FmKcnd3    | CAGACCTGGAGGACCACTCT  | 148 | Mm.44530  |
|    | RmKcnd3    | CGGTGCGGTAGAAGTTAAGC  |     |           |
| 26 | FmProx1    | GACAGCACAGACTCCGAAAA  | 127 | Mm.132579 |
|    | RmProx1    | GGTCCAGCTCACACATCTCA  |     |           |

|    |           |                       |     |           |
|----|-----------|-----------------------|-----|-----------|
| 27 | FmEsrrg   | CACCTCTCTACCCCTCTGCT  | 136 | Mm.89989  |
|    | RmEsrrg   | AGTCTCTTGGGCATGGAGTT  |     |           |
| 28 | FmLsamp   | AGACTGCTCTGCCTTCTTCC  | 142 | Mm.310524 |
|    | RmLsamp   | ACCAGGCCACTTTTGAGTTC  |     |           |
| 29 | FmPlxna2  | CCTATGTGTCCTGCCTTTT   | 149 | Mm.2251   |
|    | RmPlxna2  | CTTGAGAAGATGGCAAACA   |     |           |
| 30 | FmL1rapl2 | AGGCACTGTTGCAGAGGATA  | 121 | Mm.328321 |
|    | RmL1rapl2 | GGGGTAGCTGTCCATTGAGT  |     |           |
| 31 | FmRunx1t1 | TGACAGAGAGCCTTTGCACT  | 143 | Mm.4909   |
|    | RmRunx1t1 | GGTAATGCTGAGGTGGAGGT  |     |           |
| 32 | FmRtn4r1  | TCTCACACGCTTACCACCTC  | 134 | Mm.82661  |
|    | RmRtn4r1  | TTCTTGCCTGCCTTCTTGTA  |     |           |
| 33 | FmPtch1   | AGCCAAGGTTGTGGTAATCC  | 143 | Mm.228798 |
|    | RmPtch1   | TGAACTGGGCAGCTATGAAG  |     |           |
| 34 | FmPrkcb1  | AAGATGACGATGTGGAGTGC  | 91  | Mm.207496 |
|    | RmPrkcb1  | AAGCAGGAATGGAGCTGAGT  |     |           |
| 35 | FmCol8a1  | GCCAGGTTTTCTTGGTGAAG  | 149 | Mm.130388 |
|    | RmCol8a1  | CAGGTATGCCAGGTTCTCCT  |     |           |
| 36 | FmNotch1  | CTTCGTGCTCCTGTTCTTTG  | 120 | Mm.290610 |
|    | RmNotch1  | CTGGCCTCTGACACTTTGAA  |     |           |
| 37 | FmTshz3   | AAACCTTCTCTGGAGCTGGA  | 132 | Mm.44141  |
|    | RmTshz3   | GTACCGATTATTTGGCGTGA  |     |           |
| 38 | FmAtbf1   | CAATCACAGACACCACGACA  | 134 | Mm.416972 |
|    | RmAtbf1   | ATACTCGGACATTGCCATCA  |     |           |
| 39 | FmWnt2b   | TATCTCGTCAGCAGGAGTGG  | 121 | Mm.10740  |
|    | RmWnt2b   | GTCAAAGTCCCTCGTTGAT   |     |           |
| 40 | FmAlk     | ACCCAAAGTCCACTCTCACC  | 138 | Mm.311854 |
|    | RmAlk     | GGTCACTGTTGCACCTTCAG  |     |           |
| 41 | FmTcf4    | TTTGCCGTCTTCAGTCTACG  | 107 | Mm.4269   |
|    | RmTcf4    | AGGAGCTAGGAAAGTGCTG   |     |           |
| 42 | FmPax2    | GAGTGGTGTGGACAGTTTGC  | 112 | Mm.192158 |
|    | RmPax2    | CTGGAAGACATCGGGATAGG  |     |           |
| 43 | FmNtn1    | AGGAGGGCTTCTACCAGAC   | 111 | Mm.39095  |
|    | RmNtn1    | CAGTGGTTTGATTGCAGGTC  |     |           |
| 44 | FmDnm2    | GCCGAGTTTGAAGTGTGTTG  | 132 | Mm.39292  |
|    | RmDnm2    | TCCCTGATGTAGGTGGTGAC  |     |           |
| 45 | FmUnc5c   | AGGAACCTACTGGCATTGAC  | 148 | Mm.325205 |
|    | RmUnc5c   | CAGTCATGGCCTCTTGTTTG  |     |           |
| 46 | FmEda     | CTGACTTTGCCAGCTACGAG  | 149 | Mm.328086 |
|    | RmEda     | CATCTTCACGGCGATTTC    |     |           |
| 47 | FmIca1    | TGCAGTGTGGAGATGACC    | 107 | Mm.275683 |
|    | RmIca1    | AAAGCTGTGATGGAAGGAATC |     |           |
| 48 | FmGas7    | ACAAGACCGAGGAGGACATC  | 136 | Mm.40338  |
|    | RmGas7    | AGTTCCAGTGTGGTGTGAC   |     |           |
| 49 | FmDab1    | AAGCTCAAGGGTGTGTTGTC  | 131 | Mm.289682 |
|    | RmDab1    | ACAGCATGGTGTGCTGAAG   |     |           |
| 50 | FmNrp2    | TGAATCTCCAGGTTTCCAG   | 145 | Mm.266341 |
|    | RmNrp2    | ACAGTCTCCTTCCCCACTT   |     |           |
| 51 | FmNTRK3   | GCCAGAGCCTTTACTGCATC  | 123 | Mm.33496  |
|    | RmNTRK3   | CTCCTTCTCGACAGTCAAG   |     |           |

#### D. Primers for cloning ECR enhancer fragments

| name                       | sequence                     | size |
|----------------------------|------------------------------|------|
| 1 FmGadd45g-prom-min       | aacgtagcTCCCCACGTGGCCTTCTG   | 99   |
| RmGadd45g-prom-min         | aacaagcttGCCAGCTGGCGGGAGGCT  |      |
| 2 FmAth3-ECR1min (NeuroD4) | aacgtagcTCTGAGGCCAGTTTCTCA   | 166  |
| RmAth3-ECR1min             | aacaagcttGGCTGAAAGCCACAGACG  |      |
| 3 FmAth3-ECR2min           | aacgtagcTCTCTGCTTCAATGGCTCC  | 257  |
| RmAth3-ECR2min             | aacaagcttGGCTGTGCAATCAGCAAA  |      |
| 4 FmAth3-ECR3min           | aacgtagcGGAGGAGAATGAATGCAA   | 144  |
| RmAth3-ECR3min             | aacaagcttGTCAAAACCCCTTGACAG  |      |
| 5 FmDII1-ECR1-min1         | aacgtagcCAGACAGAACTCCAGATG   | 144  |
| RmDII1-ECR1-min1           | aacaagcttTGTCTGGTGGTAGTGTG   |      |
| 6 FmDII1-ECR1-min2         | aacgtagcGGCCAACATTACAGGCAAA  | 173  |
| RmDII1-ECR1-min2           | aacaagcttCGCCTTTAGACGCCATCA  |      |
| 7 FmDII1-ECR2-min1         | aacgtagcGGGTGTGAGTATCTTTTG   | 145  |
| RmDII1-ECR2-min1           | aacaagcttCCAACCTCACAGACAATCA |      |
| 8 FmDII1-ECR2-min2         | aacgtagcTAGGCAGGCTGGGTGATC   | 118  |
| RmDII1-ECR2-min2           | aacaagcttTCGCATGCCAGAGAAAC   |      |
| 9 FmDII1-ECR2-min4         | aacgtagcGGTGACGGTTGTGTAAG    | 201  |



|                            |                              |     |
|----------------------------|------------------------------|-----|
| RmDII1-ECR2-min4           | aacaagcttCTGTTATTGTGCGAGGCT  |     |
| 10 FmEbf3-ECR1-min         | aacgctagcGGTGAGCGCTGTCTCTTT  | 179 |
| RmEbf3-ECR1-min            | aacaagcttGGAGAGGCTTCAATGAGC  |     |
| 11 FmEbf3-ECR2-min         | aacgctagcGCCAGCCGTAGAGTGACA  |     |
| RmEbf3-ECR2-min            | aacaagcttTAACGATCCTGCCCCAGA  | 276 |
| 12 FmElav3-promo-min       | aatctcgagTAGGCCCGCACTCGCTT   |     |
| RmElav3-promo-min          | aacaagcttATGGGCTCTCTCTCTC    | 201 |
| 13 FmElav3-enh-min         | aacgctagcGAAGGAAAAGGGCTCAGA  |     |
| RmElav3-enh-min            | aacaagcttCTCCTCAGACCCCTTGG   | 165 |
| 14 FmHEN1-ECR1-min (Nhlh1) | aacgctagcTGGCAATGATGATGCAAGA |     |
| RmHEN1-ECR1-min            | aacaagcttCCAAGCTCAGCTCTCTCT  | 179 |
| 15 FmHEN1-promo-min        | aacgctagcGAGTCTCTCTGCCCTGCT  |     |
| RmHEN1-promo-min           | aacaagcttGGATCTGGGAACCCCTTG  | 210 |

**E. Primers for cloning EEL enhancer fragments**

|                  |                                                          |     |
|------------------|----------------------------------------------------------|-----|
| FmCbfa2I2EEL1    |                                                          |     |
| 16 (MTGR1)       | aacgctagcGGATTCTGGCAAGGTGAAGA                            | 637 |
| RmCbfa2I2EEL1    | TGAAAATGAGCCCTGCAGAAGT                                   |     |
| 17 FmCbfa2I2EEL6 | aacgctagcTGCAGCCATTGTTTAGCTG                             |     |
| RmCbfa2I2EEL6    | aacaagcttTTGTGTCCTTCCCATCTC                              | 566 |
| 18 FmDII1EEL1    | aacgctagcCGCATACACATGGCTAGG                              |     |
| RmDII1EEL1       | aacaagcttCCCCACTTCCAATTCTAT                              | 202 |
| 19 FmDII1EEL2    | aacgctagcTCATTGTGCCACGTCTGAAT                            |     |
| RmDII1EEL2       | aacgaattcTGGATGTGGGTACGACTTGA                            | 570 |
| 20 FmEbf2EEL1    | aacgctagcTGAGGTGAAGTGACGTGCTC                            |     |
| RmEbf2EEL1       | aacgaattcCGCGTAGATCTGCTGTTGAA                            | 383 |
| 21 FmEbf2EEL3    | aacgctagcTGCTGCGTTAGTTCATTTG                             |     |
| RmEbf2EEL3       | aacaagcttCCAAACTCCAGCCCAAGATA                            | 469 |
| 22 FmMyT1EEL     | aacgctagcCTCACAGTGCAGGGCATAA                             |     |
| RmMyT1EEL        | aacgaattcTATGACTGCTGTCGGCTCAC                            | 534 |
| 23 FmNeuroD4EEL1 | aacgctagcACGAAAGCCATCAGAAGGAAT                           |     |
| RmNeuroD4EEL1    | aacaagcttATCTCCCATCCTGAGAGCCTA                           | 340 |
| 24 FmNeuroD4EEL2 | aacgctagcACTGTTTTCCACAGGGATGTG                           |     |
| RmNeuroD4EEL2    | aacaagcttCCACATGCAATGAGACTGCT                            | 408 |
| 25 FmNeuroD4EEL4 | aacgctagcGAGAGAAATGCAGCAATCTGG                           |     |
| RmNeuroD4EEL4    | aacaagcttGAAGGTTAAATGTGCCCAAT                            | 408 |
| 26 FmZfp238EEL1  | aacgctagcTGTAGATGTGAGCTGCCTGAA                           |     |
| RmZfp238EEL1     | aacgaattcTTTCATCCTAACCCCGATACC                           | 323 |
| 27 FmZfp238EEL2  | ctagcGCACAGCTGGAGGTAGCATTTCATCTGAACATGATGTCAGAGCAGCTGACA |     |
| RmZfp238EEL2     | agctTGTCAGCTGCTGACATCATGTTTCAGATGGAAATGCTACCTCCAGCTGTGCg |     |

**F. Primers for site directed mutagenesis of E-boxes in enhancer fragments**

| name                  | sequence                             |
|-----------------------|--------------------------------------|
| 1 FmHEN1E2mut (Nhlh1) | AGGCTGAGGGGGTctcgagTGGCCCTGCCCTGG    |
| RmHEN1E2mut           | CCAGGGCAGGGCCActcgagAACCCCTCAGCCT    |
| 2 FmHEN1E1mut         | ATATGCATGGAGAActcgagTCCCTGCTCCCCCA   |
| RmHEN1E1mut           | AGGGGGAGCAGGGActcgagTTCTCCATGCATAT   |
| 3 FmEbf3ECR1E9mut     | CGACATAGGGAGGActcgagGGCACTGGCCATCTG  |
| RmEbf3ECR1E9mut       | AGATGGCCAGTGCCctcgagTCTCCCTATGTGCT   |
| 4 FmEbf3ECR1E8mut     | AGCTGGGCACTGGCctcgagACTGACTCCGGCTTG  |
| RmEbf3ECR1E8mut       | AAGCCGGAGTCACTctcgagGCCAGTGCCCACTG   |
| 5 FmEbf3ECR1E7mut     | TGACTCCGGCTTGActcgagGGAGCCCACTGGTGT  |
| RmEbf3ECR1E7mut       | CACCAGTGGGCTCCctcgagTCAAGCCGGAGTCAG  |
| 6 FmEbf3ECR1E6mut     | CTGCTATTTAAATGctcgagTGAGGGGGCTCATTG  |
| RmEbf3ECR1E6mut       | AATGAGCCCCCTCActcgagCATTAAATAGCAGC   |
| 7 FmEbf3ECR2E5mut     | TTTGGGTGCGGACctcgagATGTAGAAAATGAGC   |
| RmEbf3ECR2E5mut       | CTCATTTTCTACATctcgagGTCGCGCACCCAAAG  |
| 8 FmEbf3ECR2E4mut     | AGCCTGTTGTGAGActcgagATTCCTCCATTTCCGG |
| RmEbf3ECR2E4mut       | CGAAATGGGGGAATctcgagTCTCACAACAGGCTC  |
| 9 FmEbf3ECR2E3mut     | CCCCATTTCCGGGctcgagGCTGCCGAACACAGA   |
| RmEbf3ECR2E3mut       | CTGTGTTCCGGCAGCctcgagGCCGAAATGGGGGA  |
| 10 FmEbf3ECR2E2mut    | CCAAAATAGCGGGGctcgagCATTTGTTGTCAAAA  |
| RmEbf3ECR2E2mut       | TTTGACAACAATGctcgagCCCCGCTATTTTGGGA  |
| 11 FmEbf3ECR2E1mut    | TAGCGGGGAGCTGctcgagTTGTCAAAAAGGTTT   |
| RmEbf3ECR2E1mut       | AACCTTTTTGACAActcgagCAGCTGCCCCGCTAT  |
| 12 FmEbf3ECR2POUm     | CTGCCGAACACAGaggcctATTCATTTTCGCTT    |
| RmEbf3ECR2POUm        | AAGCGAAAATGAATaggcctCTGTGTTCCGGCAG   |
| 13 FmMyT1EELmP3       | CTGGAGAAAGTGGTaggcctTACAGATGCAGAA    |
| RmMyT1EELmP3          | TTCTGCATCTGTAaggcctACCACCTTCTCCAG    |
| 14 FmMyT1EELmP2       | AAGAGTTTTATGAAaggcctGAACTGACACTTGG   |

|                   |                                      |
|-------------------|--------------------------------------|
| RmMyT1EELmP2      | CCAAGTGTCAGTTCAaggcctTTCATAAAAACTCTT |
| 15FmMyT1EELmP1    | TGCTGTGTGCGGAaggcctACAAGTAATTACACC   |
| RmMyT1EELmP1      | GGTGAATTACTTGTaggcctTCCGCACACAGACA   |
| 16F-DII1ECR1m2mE2 | GAGTGAAAAACGCctcgagGGTTCGGAGCAGATG   |
| R-DII1ECR1m2mE2   | ATCTGCTCCGAACCctcgagGCGTTTTTCACTC    |
| 17F-DII1ECR1m2mE1 | CATTGGTTCCGAGctcgagGGCTGGCTAGG       |
| R-DII1ECR1m2mE1   | CCTAGCCAGCCctcgagCTCCGAACCAAATG      |

#### G. Primers for chromatin immunoprecipitation

| primer name                  | primer sequence        | Product size |
|------------------------------|------------------------|--------------|
| F-mEbf3 ECR1 ChIP            | TTAGGTGATGCCACAAACA    | 291          |
| R-mEbf3 ECR1 ChIP            | CCTTGGAGGGTGGGAAGTAT   |              |
| F-mEbf3 ECR2 ChIP            | CTAGGGTGGAGACCCTTCCT   | 245          |
| R-mEbf3 ECR2 ChIP            | AAGCGAAAAATGAATGCAAATC |              |
| F-mHEN1 ECR1 ChIP (Nhlh1)    | ATGGCAATGATGATGCAAGA   | 282          |
| R-mHEN1ECR1 ChIP             | AcaggtgTGCAAAGGATTC    |              |
| F-mEbf2 EEL1 ChIP            | CCCGACTGTAATGATGCTGA   | 162          |
| reverse primer               | use RmEbf2EEL1         |              |
| F-mEbf2 EEL3 ChIP            | TTCGCCAATTATTAGCAAGGA  | 295          |
| R-mEbf2 EEL3 ChIP            | CCTGCGATTGCATAACAAAA   |              |
| F-mMTGR1 EEL1 ChIP           | GGATTCTGGCAAGGTGAAGA   | 162          |
| R-mMTGR1 EEL1 ChIP           | GACAGCCTTCCTCCTCCTTT   |              |
| F-mMTGR1 EEL6 ChIP           | TGCAGCCATTGTTTTAGCTG   | 171          |
| R-mMTGR1 EEL6 ChIP           | GGAAGTAATCAAGCGCAAGG   |              |
| F-mNeuroD4 EEL4 ChIP         | CCTTGTCAGCCTTTCAGGAG   | 270          |
| R-mNeuroD4 EEL4 ChIP         | AGAGTTGCTTTCAGGCCAAA   |              |
| F-mZnf238 EEL1 ChIP (Zfp238) | GATGTGAGCTGCCTGAATTG   | 135          |
| R-mZnf238 EEL1 ChIP          | AGAGGGACGAAGAAGGAAGC   |              |

## Seo\_Supplemental Figure S2.

### A. Sequences of functional (Ngn/NeuroD-responsive) EEL and ECR enhancers

MTGR1 EEL1 (162 bp)

ggattctggcaaggtgaagagctggtctgtttggcaggacctcc**CATCTG**ggatc**CATCTG**gtttccctggaatgggacaggca  
gctctagtcaagtgaatcg**CAGATG**tgagagagctgacacatgctccagctaataaaggaggaggaaggctgc

MTGR1 EEL6 (566 bp)

Tgcagccattgttttagctggtctcttcacccctctgctgttactctgctcttttgggccattgtttctgtaggaaattagcattaatc**CATC**  
**TG**aaacccccatgcccctcaactgcaggtgactgttctggccc**CAGCTG**ccacccttgcgcttgattactccataggggctgtgca  
aagaagtagtagcatttattgattgccaccacaagccccacccaataaactgaaatctattaggcctccagtaggctgtagctca  
ttggcattacactgtgatgaacgtttacaagcaaaataattatgtctttttcttcccttagcctttccgaatgacagatggagaaaacctga  
gttatcatagtgttaattgaaatgctggagctagatgcttctcagtagtgagctctaagaattggatggactgtctgaaaatttagtca  
atttaaatatttctgaccacccataggttcaagcaaacatggcctgataagtccttaggatagagatgggaaggacacaaa

DLL1 EEL1 (202 bp)

cgcatacacacatggctagggccgggggtgggggtgggggtggggggcagcattgttgctgggg**CAGCTG**cgggaggggaagac  
acaatggag**CAGCTG**tctgccctgcagctgcacac**CAGCTG**tccactcttatctgcacacacactttctgggatagaagaggt  
gggctttgtcatagaattgggaagtggggg

DLL1 EEL2 (569 bp)

tcattgtccacgtctgaatgcctgtgaataggcagagcatatcggcctgtcactgcaggtgccca**CATCTG**ttctccagg**CAG**  
**ATG**tcatagaaaaggaggtgggggaggccagggaagcctggagcactaaaagcttcttggcctagcctctctggggcatctg  
ggagtggcctttgggtgctgctgtgtccaacagggaacttctggggagggcctgaaccacacgtgctcacacagcaagcatagctcagac  
cctagttaagcctgagagcggcaggctttgaggttattgtaagaaactcttgggagcctaactttaacttcccggccaaggccagagcc  
tgagcaattagacactggggagagagagagcagggaggggagcagtagggtagcgtggaggcagtgatcttgcacatcgttcga  
cagccagctggtcctctgataccaggtgaggtgagagcactgtgccccggccagctgcatggaaccagcagcactctctcaaagc  
tttgactcaagctgaccacatcca

Ebf2 EEL1 (383 bp)

tgaggtgaagtacgtgctcaggtccccctcaatggagactcaagcagctctgaagcgcagcttctttcgtcgcgggcaaacgtgc  
acccagggcgtgtcctctagcggcgaactctgcagctcgtctgtgagcgtcacctacagctagggggtccggctcaggagcaattga  
cactcaaacctgagccctgagccgggaggaaagactcccactgtaatgatgctgagaggtcgggtgagctcgtcgaaccggcg**C**  
**AGCTG**attgctcctccag**CAGATG**gtctttgagcaca**gattgca**tctt**caaat**ctgtttcgcgctggcgttctagattc  
aacagcagatctacgcg

Ebf2 EEL3 (469 bp)

tgctgcgttagtcttcccaattattagcaaggagatactaggtgtatgttgcctgccaccctcgcacctcaatgctcagagggtta  
aaagatattataattgaacagaagctgctctagcccta**CAGCTG**gctaataacagagttgattgagcgtgagcaaaccca**CAGC**  
**TG**gacttttccacaaggcgcaggttagacagggccctaat**CAGATG**ggccagccgggcagtgggccagtgctttatcggc  
**CAGATG**gtgtgaatttagacacttttattgcaatcgcagggaggagttggggagaagaaaacaaaagccaccatgctgtga  
gcttattgagttgaaattagagacagattttgaaagttgaggggtgaaatftaaaaaatgagttggaagggaagacacattagcttattc  
ggctggagtttg

Ebf3 ECR1 (179 bp)

ggtgagcgtgtctcttfaaggtcactgcctgctccggcagcagacataggagga**CAGCTG**ggcactggc**CATCTG**actgactcc  
ggcttga**CATCTG**ggagcccactggtgtggtggcacggaagcgttgatgctgctattfaaatg**CAAATG**tgagggggctcattg  
aagcctctcc

Ebf3 ECR2 (276 bp)

gccagccgtagagtgacaaaaagataaagttggtgaatgataaagaccgtatftccacgcttgggtgcgcgacCAGATGatgtaga  
aaatgagctgaaatggattcagccccgagcctgtgtgagaCAGCTGattccccatttcgggcCAGATGgctgccgaacacag  
attgcaatcatttcgcttaatatcgtccaaaatagcggggCAGCTGCATTGttgtcaaaaagggttaaaccaccttctttctggg  
gcaggatcgta

MyT1 EEL (534 bp)

ctcacagttgcagggcataagtgtgcatgtgtgagggagtctcataaactcattgccaaatgttgcgagtgtgagacaagcacacaaagt  
cagcctggagtggtgtaaagtggctcctggtttgttctcCATCTGccaggcctgctggggcagcgcccccagccctCAG  
CTGttctatacaatattaatgctgacctctcggctgcgcacacaacgccctaattgtcggcgagcattaaggcaggcgcctCATCT  
GcggaagccttcagaaggaaacaagaaaacctcaccctCAGCTGgtcactggagaaggtgtgccaattaCAGATGcagaa  
agtttagaacaataacttgaagagttttatgaagcaaatgaactgacacttggaatgtctgtgtgcgattgcaagaataactacaccttatt  
tgaatgatcctaccagtaagcaacaattaagtctgctctccagcgcacacaagcacttccgagtgcagccgacagcagtcata

NeuroD4 EEL1 (340 bp)

acgaaagccatcagaaggaatcactgggttacagtctagagtgtgtgactCAGCTGgagcctgaatacaaaaaggctcctgagcagaa  
gcatcaggacagacagagggCAGATGaaattgtcctgcagttggcacagtcacaagaatttcaaggataaatgagaagaaaa  
tcagccctgggagggagcactgctgacatgtttcctgcttctgagcagCAGCTGcaggCAGATGgagCAGCTGCAGC  
TCtcctaggagcctggattcctgggaaagaggcctcaggaaggaaatgggagggagcagcagcataggctctcaggatgggagat

NeuroD4 EEL2 (408 bp)

actgtttaccagggatgtgctccttaagaggctgccatgagctgtctatgtctcactcatgacacttctgcttctgcacatgggctatgt  
gcattggcccagtgatgcatagccttttaggaaaaggctCATCTGtgcctgttcggttcatcttccagaccctggagattggcag  
agaccctagagaagaactgcttctgggtgtagggCAGATGctgtgCAGCTGagctattaggacaagcctggctctgcagtttta  
gaagtcagacagatcagccccattcttactagaggaaattggtgagttctcactctcagtaacctctcaagcccagagagagcgtgta  
ttgagaaaaagctgaagaagtagcagctcattgcatgtgg

NeuroD4 EEL4 (408 bp)

gagagaaatgcagcaatctgggcagggtgacctaaactgatctccatagtcctctgtgataatccctgcctctcccctactcctgtcag  
ccttcaggaggtcagcagatgacgttactgtgggggtgggagtaggattgagttgccttccctgtCAGCTGgtgtttgtttcatgaCA  
GATGgtgggtgatgactgtctttatgtcttccctagccttagaggagttttatgtccagcaaatgtctatacttccagaggaat  
ggCATCTGcctctgaggggatgtccagcagcactctgtcttcttcttgcactccttggcctgaaagcaactctgtgacctttagtga  
cttaggagacatagattggggcacattaacctt

Zfp238 EEL1 (323 bp)

tgtagatgtgagctgctgaattggccagaCAGCTGtaatcgactcctctattcttaatcttcttcttggcagCAGCTGcCATA  
TGgccacagtCAGCTGgatCAGATGttataagcttcttcttctcctctgtcctctcagcctcctaattgatcacggetacctgtg  
gagctgcccctcaatcttatttttagccctctcaaggattagattgattgagctgtagggcacttaagtattgtattgaaatctggtttatc  
tattggtggtgtcttcttctcagaaggtatcggggttaggatgaaa

Zfp238EEL2 (69 bp)

ttaaaggagcaCAGCTGgaggtagcatttcCATCTGaacatgatgtcagagCAGCTGacagcctgcat

HEN1 promo (210 bp)

GagtctctctgcctgctacctctagtgtgggaggtgagggggtCATCTGtgccctgccctggtcttgcctcagccccccccttc  
cccagctctctatttctgctatgaaatgcatggagaaCAGATGtcctctccccactccccccccctcaggccagcccc  
ccccagctccaaggggtccagatcc

## B. Sequences of non-functional EEL and ECR enhancers

mGadd45g mini (2)

tcccCACGTGgccttctggcagagccgagccctgccctcattgcatcagaaagcgggcgctggccaatgggagtgagcctc  
ccgcCAGCTGgc

mNeuroD4 ECR1 (3)

tctgagccccagttctcactttctatagctctgattatgcctctggaccCATTGtttgaagtagtggtcttaattcaaaaaggCA  
AGTGgtctccaaggaagaggagaagggggaCATCTGgggacagtaccaacagcgtctgtgcttccagcc

mNeuroD4 ECR2+3 (4)

tctctgctcaatggctctagtgctcagggccagtgccagCAACTGagtgctggtctggtctcttttccactcagCAGATGgtt  
ctaacaggttacctcagatctttacaaaaagcaatagagaaagggagggctgtggactggccctctggccaggaaatgtggggg  
aggagaatgaatCAAATGaccttaattcttttctacggcagtcactccctcttttctgattgcacagcctttctgccttctgc  
tctctcagaattcaacagccaacccaCAACTGtcaaggggtttgac

mDl1 ECR1 mini1 (3)

cagacagaactCAGATGCACTTGttgtggctttaaattctgattattatgcaacctgagctgcctatccaccattgcaattattcag  
attgggctggggggggggggCATGTGgaaaaaatcaactaccaccagac

mDl1 ECR2 mini1 (2)

gggtgctagatctttgaagcctCATTGttctataataaacaggtttttaaagtgggatctaacctgectttctcacctcagccttga  
gtattataCACATGgcttttggtaactcttctgattgtctgtgagttgg

mDl1 ECR2 mini2 (3)

taggcaggctgggtcatcagaaaggagctgtaattCAGTTGcCAGATGgccaacaCAGATGattctgccagtaactg  
ctagattctgttagcagtgcttctctggcatgca

mDl1 ECR2 mini4 (3)

gtgacgggtgtgaaaggttatgtgtgggggtgaggtggggggagctttcaaaCATGTGccggacattgtgcagaggccgccc  
gtgcgggaggggagctcttctcgcattgtgcagagagCAGGTGctgtctgattaccataCAGCTGagcgcacaaagagc  
cactgattcagcctgcacaataaca

mElav13 promo mini (2)

gcactcgttcCACCTGcccgccgctgggagccgggagggagccggagaccaccgtctcagccaatgagcgacggcgctg  
gCAGCTGcctctat

mElav13 enh mini (3)

aaggaaaagggtcagaaatacaaggttggtctgtacCACGTGgtggccctgactgtgtgcttagatgccactcaaagccctatt  
gtcaccagatccaggCATCTGtactgtgactggagccagaggccCAGCTGgaggccaaggggtctgagga

mHEN1 ECR1 mini (4)

tggcaatgatgatgcaagaaccaagccgcCACCTGatccctgccccccccctcctcagcccttctccctccagctcagccC  
ATCTGctggcgcctgggCACCTGtctggcctgccCAGGTGggagttggcacctccagcctgggggtggggagagga  
gcgtgagctt

**Key:**

CAGATG-type (and reverse complements for each motif)  
 CAGCTG-type  
 CAAATG-type  
 Highlighted are Pou site, degenerate consensus gmttkgmw

### C. Types of E-boxes found in all ECR enhancers versus those in functional ECRs

#### Types of E-boxes found in all ECR fragments:

|                  |                  |                  |                 |
|------------------|------------------|------------------|-----------------|
| CAGGTG: 5 (17.2) | CAAGTG: 2 (6.9)  | CATGTG: 3 (10.3) | CACGTG: 2 (6.9) |
| CAGATG: 7 (24.1) | CAAATG: 3 (10.3) | CATATG: 0        |                 |
| CAGTTG: 3 (10.3) | CAATTG: 0        |                  |                 |
| CAGCTG: 4 (13.8) |                  |                  | total: 29       |

#### Types of E-boxes found in functional (Ngn/NeuroD-responsive) ECR fragments:

In Ebf3 ECR1 (4), Ebf3 ECR2 (5), HEN1 promo (2), and Dll1 ECR1 mini1 (2): total 13

|                      |               |
|----------------------|---------------|
| CAGATG: 7/13 = 53.8% | 14/42 = 33.3% |
| CAGCTG: 3/13 = 23.1% | 7/42 = 16.7%  |
| CAAATG: 3/13 = 23.1% | 6/42 = 14.3%  |

### D. Weight matrices (experimental and computational)

>Ngn2 experimental consensus

```
A 3 1 0 7 2 6 0 0 0 0
C 2 4 7 0 0 1 0 0 0 6
G 1 2 0 0 5 0 0 7 3 1
T 1 0 0 0 0 0 7 0 4 0
```

>NeuroD1 experimental consensus

```
A 1 1 0 5 0 4 0 0 0 0
C 2 3 5 0 0 1 0 0 0 5
G 2 0 0 0 5 0 0 5 2 0
T 0 1 0 0 0 0 5 0 3 0
```

>Ngn/NeuroD position frequency matrix-CompareProspector

```
A 13 27 0 57 3 36 0 0
C 10 5 57 0 0 21 0 0
G 27 12 0 0 48 0 0 57
T 7 13 0 0 6 0 57 0
```

>POU position frequency matrix

```
A 4 23 3 0 0 0 6 25
C 3 11 0 0 0 0 28 0
G 27 0 0 0 9 34 0 0
T 0 0 31 34 25 0 0 9
```

## E. Artificial enhancer primer sequences

|             |                                                              |
|-------------|--------------------------------------------------------------|
| 5' GA E box | ctagcCAGATGtcgactgtacgacatgcCAGATGtcgaatgtaggacttgcCAGATGtca |
| 3' GA E box | gatctgaCATCTGgcaagtcctacattcgaCATCTGgcatgtctacagtgcgaCATCTGg |
| 5' GC E box | ctagcCAGCTGtcgactgtacgacatgcCAGCTGtcgaatgtaggacttgcCAGCTGtca |
| 3' GC E box | gatctgaCAGCTGgcaagtcctacattcgaCAGCTGgcatgtctacagtgcgaCAGCTGg |
| 5' AA E box | ctagcCAAATGtcgactgtacgacatgcCAAATGtcgaatgtaggacttgcCAAATGtca |
| 3' AA E box | gatctgaCATTTGgcaagtcctacattcgaCATTTGgcatgtctacagtgcgaCATTTGg |
| 5' AT E box | ctagcCAATTGtcgactgtacgacatgcCAATTGtcgaatgtaggacttgcCAATTGtca |
| 3' AT E box | gatctgaCAATTGgcaagtcctacattcgaCAATTGgcatgtctacagtgcgaCAATTGg |
| 5' TA E box | ctagcCATATGtcgactgtacgacatgcCATATGtcgaatgtaggacttgcCATATGtca |
| 3' TA E box | gatctgaCATATGgcaagtcctacattcgaCATATGgcatgtctacagtgcgaCATATGg |
| 5' CG E box | ctagcCACGTGtcgactgtacgacatgcCACGTGtcgaatgtaggacttgcCACGTGtca |
| 3' CG E box | gatctgaCACGTGgcaagtcctacattcgaCACGTGgcatgtctacagtgcgaCACGTGg |
| 5' GG E box | ctagcCAGGTGtcgactgtacgacatgcCAGGTGtcgaatgtaggacttgcCAGGTGtca |
| 3' GG E box | gatctgaCACCTGgcaagtcctacattcgaCACCTGgcatgtctacagtgcgaCACCTGg |
| 5' GT E box | ctagcCAGTTGtcgactgtacgacatgcCAGTTGtcgaatgtaggacttgcCAGTTGtca |
| 3' GT E box | gatctgaCAACTGgcaagtcctacattcgaCAACTGgcatgtctacagtgcgaCAACTGg |
| 5' AG E box | ctagcCAAGTGtcgactgtacgacatgcCAAGTGtcgaatgtaggacttgcCAAGTGtca |
| 3' AG E box | gatctgaCACTTGgcaagtcctacattcgaCACTTGgcatgtctacagtgcgaCACTTGg |
| 5' TG E box | ctagcCATGTGtcgactgtacgacatgcCATGTGtcgaatgtaggacttgcCATGTGtca |
| 3' TG E box | gatctgaCACATGgcaagtcctacattcgaCACATGgcatgtctacagtgcgaCACATGg |

Seo\_Supplemental Figure S3. Ngn and NeuroD target genes that regulate cell migration/morphology

| Gene name<br>(Gene symbol)                                               | Xenopus<br>Unigene   | Protein structure/roles                                                                                                                                                                        | References                                                                                                                                                                                                                                                                                                                                                                                                                                                                                                                                                            |
|--------------------------------------------------------------------------|----------------------|------------------------------------------------------------------------------------------------------------------------------------------------------------------------------------------------|-----------------------------------------------------------------------------------------------------------------------------------------------------------------------------------------------------------------------------------------------------------------------------------------------------------------------------------------------------------------------------------------------------------------------------------------------------------------------------------------------------------------------------------------------------------------------|
| Calponin2 (Cnn2)                                                         | Xl.554               | Thin, filament-associated protein that regulates migration of endothelial cells in zebrafish                                                                                                   | Tang, J., G. Hu, J. Hanai, G. Yadlapalli, Y. Lin, B. Zhang, J. Galloway, N. Bahary, S. Sinha, B. Thisse, C. Thisse, J.P. Jin, L.I. Zon, and V.P. Sukhatme. 2006. A critical role for calponin 2 in vascular development. <i>J Biol Chem</i> <b>281</b> : 6664-72.                                                                                                                                                                                                                                                                                                     |
| Frizzled homolog 7 (Fzd7)                                                | Xl.663               | Planar cell polarity (PCP) pathway; regulates convergent extension during gastrulation                                                                                                         | Djiane, A., J. Riou, M. Umbhauer, J. Boucaut, and D. Shi. 2000. Role of frizzled 7 in the regulation of convergent extension movements during gastrulation in <i>Xenopus laevis</i> . <i>Development</i> <b>127</b> : 3091-100.<br>Sumanas, S. and S.C. Ekker. 2001. <i>Xenopus</i> frizzled-7 morphant displays defects in dorsoventral patterning and convergent extension movements during gastrulation. <i>Genesis</i> <b>30</b> : 119-22.                                                                                                                        |
| Prickle 1 (Prickle)                                                      | Xl.7556/<br>Xl.12111 | Planar cell polarity (PCP) pathway; regulates posterior migration of motor neurons in zebrafish                                                                                                | Carreira-Barbosa, F., M.L. Concha, M. Takeuchi, N. Ueno, S.W. Wilson, and M. Tada. 2003. Prickle 1 regulates cell movements during gastrulation and neuronal migration in zebrafish. <i>Development</i> <b>130</b> : 4037-46.                                                                                                                                                                                                                                                                                                                                         |
| MGC68463 similar to growth arrest-specific 6 (Gas-6)                     | Xl.4807              | Regulates migration of gonadotropin-releasing hormone (GnRH) neurons by controlling actin cytoskeleton reorganization and promoting lamellipodial extension, membrane ruffling, and chemotaxis | Allen, M.P., D.A. Linseman, H. Udo, M. Xu, J.B. Schaack, B. Varnum, E.R. Kandel, K.A. Heidenreich, and M.E. Wierman. 2002. Novel mechanism for gonadotropin-releasing hormone neuronal migration involving Gas6/Ark signaling to p38 mitogen-activated protein kinase. <i>Mol Cell Biol</i> <b>22</b> : 599-613.                                                                                                                                                                                                                                                      |
| Similar to LIM and senescent cell antigen-like domains 1 (Lims1, PINCH1) | Xl.8188              | Regulates assembly of the actin cytoskeleton                                                                                                                                                   | Li, S., R. Bordoy, F. Stanchi, M. Moser, A. Braun, O. Kudlacek, U.M. Wewer, P.D. Yurchenco, and R. Fassler. 2005. PINCH1 regulates cell-matrix and cell-cell adhesions, cell polarity and cell survival during the peri-implantation stage. <i>J Cell Sci</i> <b>118</b> : 2913-21.                                                                                                                                                                                                                                                                                   |
| Transcribed locus similar to Myosin 10                                   | Xl.24147             | Mediates interactions between the cytoskeleton and plasma membrane and stimulates formation of filopodia                                                                                       | Sousa, A.D. and R.E. Cheney. 2005. Myosin-X: a molecular motor at the cell's fingertips. <i>Trends Cell Biol</i> <b>15</b> : 533-9.<br>Zhang, H., J.S. Berg, Z. Li, Y. Wang, P. Lang, A.D. Sousa, A. Bhaskar, R.E. Cheney, and S. Stromblad. 2004. Myosin-X provides a motor-based link between integrins and the cytoskeleton. <i>Nat Cell Biol</i> <b>6</b> : 523-31                                                                                                                                                                                                |
| LOC494829 similar to Drebin-1 (Dbn1)                                     | Xl.49084             | F-actin binding protein that localizes to dendrites and is involved in spinogenesis and synaptogenesis in dendrites                                                                            | Aoki, C., Y. Sekino, K. Hanamura, S. Fujisawa, V. Mahadomrongkul, Y. Ren, and T. Shiraio. 2005. Drebrin A is a postsynaptic protein that localizes in vivo to the submembranous surface of dendritic sites forming excitatory synapses. <i>J Comp Neurol</i> <b>483</b> : 383-402.<br>Mizui, T., H. Takahashi, Y. Sekino, and T. Shiraio. 2005. Overexpression of drebrin A in immature neurons induces the accumulation of F-actin and PSD-95 into dendritic filopodia, and the formation of large abnormal protrusions. <i>Mol Cell Neurosci</i> <b>30</b> : 630-8. |
| Polo-like kinase 3 (Plk3; Plx3 in <i>Xenopus</i> )                       | Xl.16835             | Regulates the actin cytoskeleton                                                                                                                                                               | Duncan, P.I., N. Pollet, C. Niehrs, and E.A. Nigg. 2001. Cloning and characterization of Plx2 and Plx3, two additional Polo-like kinases from <i>Xenopus laevis</i> . <i>Exp Cell Res</i> <b>270</b> : 78-87.<br>Liu, X. and R.L. Erikson. 2002. Activation of Cdc2/cyclin B and inhibition of centrosome amplification in cells depleted of Plk1 by siRNA. <i>Proc Natl Acad Sci U S A</i> <b>99</b> : 8672-6.                                                                                                                                                       |
| Similar to angiomin-2 (Amot2)                                            | Xl.53293/Xl.76708    | Like mammalian Angiomin, which localizes to the leading edge of migrating endothelial cells and promotes cell migration and tube formation                                                     | Bratt, A., O. Birot, I. Sinha, N. Veitonmaki, K. Aase, M. Ernkvist, and L. Holmgren. 2005. Angiomin regulates endothelial cell-cell junctions and cell motility. <i>J Biol Chem</i> <b>280</b> : 34859-69.<br>Trojanovsky, B., T. Levchenko, G. Mansson, O. Matvienko, and L. Holmgren. 2001. Angiomin: an angiostatin binding protein that regulates endothelial cell migration and tube formation. <i>J Cell Biol</i> <b>152</b> : 1247-54.                                                                                                                         |



Seo\_Supplemental Figure S4. Expression Profiles of Ngn/NeuroD target genes

A. Expression profiles of Ngn/NeuroD-responsive target genes from microarray

|                                      | # of genes with expression in tissue | Percentage of genes with expression in tissue | Nhlh1 | Neurod4 | Pou3f1 | Pou3f2 | Ebf2 | Ebf3 | Hes5 | Dll1 | Elavl3 | Sat1 | Gadd45g | RIKEN cDNA 9330182L06 |
|--------------------------------------|--------------------------------------|-----------------------------------------------|-------|---------|--------|--------|------|------|------|------|--------|------|---------|-----------------------|
| adipose tissue                       | 1                                    | 8%                                            | 0     | 0       | 0      | 0      | 0    | 0    | 0    | 0    | 0      | 1486 | 0       | 0                     |
| blood                                | 0                                    | 0%                                            | 0     | 0       | 0      | 0      | 22   | 0    | 0    | 0    | 0      | 88   | 33      | 0                     |
| bone                                 | 1                                    | 8%                                            | 0     | 0       | 0      | 0      | 0    | 56   | 0    | 0    | 0      | 56   | 0       | 0                     |
| bone marrow                          | 0                                    | 0%                                            | 0     | 0       | 0      | 0      | 0    | 13   | 0    | 0    | 6      | 34   | 13      | 6                     |
| brain                                | 7                                    | 58%                                           | 22    | 16      | 9      | 9      | 29   | 45   | 74   | 3    | 110    | 38   | 35      | 97                    |
| connective tissue                    | 3                                    | 25%                                           | 0     | 0       | 0      | 0      | 148  | 49   | 0    | 0    | 0      | 49   | 297     | 0                     |
| dorsal root ganglion                 | 6                                    | 50%                                           | 0     | 371     | 0      | 0      | 371  | 297  | 74   | 222  | 0      | 74   | 0       | 74                    |
| embryonic tissue                     | 2                                    | 17%                                           | 6     | 0       | 0      | 0      | 42   | 12   | 0    | 12   | 0      | 54   | 12      | 42                    |
| endocrine                            | 3                                    | 25%                                           | 0     | 117     | 0      | 0      | 58   | 58   | 0    | 0    | 0      | 88   | 29      | 176                   |
| epididymis                           | 0                                    | 0%                                            | 0     | 0       | 0      | 0      | 0    | 0    | 0    | 0    | 0      | 0    | 0       | 0                     |
| extraembryonic tissue                | 1                                    | 8%                                            | 0     | 0       | 0      | 0      | 0    | 13   | 0    | 13   | 0      | 26   | 173     | 0                     |
| eye                                  | 7                                    | 58%                                           | 10    | 183     | 10     | 0      | 16   | 145  | 91   | 48   | 113    | 48   | 5       | 32                    |
| female genital                       | 1                                    | 8%                                            | 0     | 0       | 0      | 0      | 24   | 24   | 0    | 0    | 0      | 74   | 49      | 0                     |
| gastrointestinal tract               | 1                                    | 8%                                            | 0     | 16      | 0      | 0      | 32   | 0    | 0    | 0    | 8      | 82   | 74      | 0                     |
| head and neck                        | 8                                    | 67%                                           | 15    | 0       | 0      | 0      | 176  | 107  | 53   | 30   | 30     | 46   | 46      | 53                    |
| heart                                | 2                                    | 17%                                           | 0     | 0       | 0      | 0      | 36   | 90   | 0    | 0    | 0      | 0    | 36      | 0                     |
| inner ear                            | 4                                    | 33%                                           | 0     | 0       | 0      | 25     | 355  | 50   | 0    | 25   | 0      | 0    | 25      | 0                     |
| limb                                 | 0                                    | 0%                                            | 0     | 0       | 0      | 0      | 0    | 33   | 0    | 0    | 0      | 33   | 0       | 0                     |
| liver                                | 1                                    | 8%                                            | 0     | 0       | 0      | 0      | 26   | 17   | 0    | 0    | 0      | 62   | 35      | 0                     |
| lung                                 | 3                                    | 25%                                           | 0     | 0       | 0      | 0      | 0    | 0    | 0    | 38   | 0      | 241  | 135     | 9                     |
| lymph node                           | 2                                    | 17%                                           | 0     | 0       | 0      | 0      | 0    | 0    | 0    | 63   | 0      | 255  | 0       | 0                     |
| mammary gland                        | 1                                    | 8%                                            | 0     | 0       | 0      | 0      | 12   | 28   | 0    | 12   | 0      | 338  | 22      | 9                     |
| muscle                               | 1                                    | 8%                                            | 0     | 0       | 0      | 0      | 0    | 0    | 0    | 0    | 0      | 224  | 0       | 0                     |
| pancreas                             | 4                                    | 33%                                           | 9     | 0       | 0      | 0      | 45   | 72   | 0    | 27   | 0      | 18   | 82      | 18                    |
| prostate                             | 1                                    | 8%                                            | 0     | 0       | 0      | 0      | 0    | 0    | 0    | 0    | 0      | 355  | 0       | 0                     |
| skin                                 | 2                                    | 17%                                           | 0     | 0       | 11     | 0      | 11   | 22   | 0    | 0    | 0      | 11   | 0       | 44                    |
| spinal cord                          | 7                                    | 58%                                           | 0     | 74      | 0      | 0      | 187  | 187  | 74   | 37   | 299    | 0    | 0       | 112                   |
| spleen                               | 1                                    | 8%                                            | 0     | 0       | 0      | 0      | 0    | 20   | 10   | 0    | 0      | 10   | 40      | 0                     |
| sympathetic ganglion                 | 2                                    | 17%                                           | 0     | 0       | 0      | 0      | 358  | 0    | 0    | 0    | 0      | 0    | 0       | 448                   |
| testis                               | 1                                    | 8%                                            | 0     | 0       | 0      | 0      | 16   | 16   | 0    | 0    | 0      | 162  | 0       | 0                     |
| thymus                               | 1                                    | 8%                                            | 0     | 0       | 0      | 0      | 37   | 0    | 29   | 0    | 0      | 29   | 0       | 0                     |
| urinary                              | 3                                    | 25%                                           | 0     | 0       | 0      | 0      | 0    | 28   | 0    | 21   | 7      | 141  | 56      | 0                     |
| vascular                             | 2                                    | 17%                                           | 0     | 0       | 0      | 0      | 160  | 80   | 0    | 0    | 0      | 0    | 0       | 0                     |
| vesicular gland                      | 0                                    | 0%                                            | 0     | 0       | 0      | 0      | 0    | 0    | 0    | 0    | 0      | 0    | 0       | 0                     |
| AVERAGE (in transcripts per million) |                                      |                                               | 2     | 23      | 1      | 1      | 64   | 43   | 12   | 16   | 17     | 121  | 35      | 33                    |

**B. Expression profiles of non-responsive target genes from microarray**

|                                      | # of genes with expression in tissue | Percentage of genes with expression in tissue | Twist1 | Btd6 | Zfx1b | Slc43a2 | Irx3 | b4galt3 | Plk3 | Prickle |
|--------------------------------------|--------------------------------------|-----------------------------------------------|--------|------|-------|---------|------|---------|------|---------|
| adipose tissue                       | 0                                    | 0%                                            | 0      | 0    | 0     | 0       | 0    | 0       | 0    | 0       |
| blood                                | 2                                    | 25%                                           | 0      | 0    | 66    | 231     | 0    | 121     | 0    | 0       |
| bone                                 | 4                                    | 50%                                           | 0      | 28   | 113   | 142     | 0    | 56      | 0    | 113     |
| bone marrow                          | 1                                    | 13%                                           | 0      | 6    | 224   | 81      | 0    | 61      | 6    | 6       |
| brain                                | 5                                    | 63%                                           | 0      | 29   | 110   | 84      | 0    | 129     | 35   | 107     |
| connective tissue                    | 0                                    | 0%                                            | 0      | 0    | 0     | 0       | 0    | 0       | 0    | 0       |
| dorsal root ganglion                 | 2                                    | 25%                                           | 0      | 0    | 445   | 0       | 0    | 0       | 0    | 222     |
| embryonic tissue                     | 2                                    | 25%                                           | 12     | 0    | 79    | 6       | 0    | 36      | 0    | 134     |
| endocrine                            | 3                                    | 38%                                           | 58     | 0    | 117   | 0       | 29   | 29      | 0    | 29      |
| epididymis                           | 0                                    | 0%                                            | 0      | 0    | 0     | 0       | 0    | 0       | 0    | 0       |
| extraembryonic tissue                | 1                                    | 13%                                           | 0      | 13   | 26    | 106     | 13   | 93      | 0    | 0       |
| eye                                  | 3                                    | 38%                                           | 0      | 16   | 156   | 21      | 32   | 37      | 10   | 75      |
| female genital                       | 5                                    | 63%                                           | 0      | 0    | 174   | 24      | 24   | 174     | 74   | 74      |
| gastrointestinal tract               | 1                                    | 13%                                           | 0      | 8    | 32    | 65      | 0    | 41      | 16   | 32      |
| head and neck                        | 1                                    | 13%                                           | 15     | 15   | 76    | 46      | 7    | 69      | 0    | 38      |
| heart                                | 3                                    | 38%                                           | 0      | 36   | 72    | 54      | 18   | 90      | 0    | 18      |
| inner ear                            | 3                                    | 38%                                           | 25     | 0    | 152   | 50      | 0    | 0       | 0    | 126     |
| limb                                 | 4                                    | 50%                                           | 67     | 67   | 0     | 0       | 67   | 100     | 0    | 0       |
| liver                                | 2                                    | 25%                                           | 0      | 80   | 17    | 8       | 0    | 17      | 35   | 0       |
| lung                                 | 7                                    | 88%                                           | 19     | 38   | 106   | 115     | 77   | 115     | 28   | 125     |
| lymph node                           | 1                                    | 13%                                           | 0      | 0    | 191   | 0       | 0    | 0       | 0    | 0       |
| mammary gland                        | 3                                    | 38%                                           | 25     | 16   | 70    | 25      | 125  | 125     | 3    | 32      |
| muscle                               | 2                                    | 25%                                           | 0      | 112  | 37    | 0       | 37   | 37      | 0    | 0       |
| pancreas                             | 1                                    | 13%                                           | 0      | 0    | 118   | 9       | 0    | 9       | 0    | 18      |
| prostate                             | 1                                    | 13%                                           | 0      | 0    | 129   | 32      | 0    | 0       | 0    | 32      |
| skin                                 | 7                                    | 88%                                           | 0      | 33   | 166   | 110     | 22   | 88      | 33   | 221     |
| spinal cord                          | 2                                    | 25%                                           | 0      | 0    | 112   | 37      | 0    | 224     | 0    | 0       |
| spleen                               | 1                                    | 13%                                           | 0      | 0    | 120   | 60      | 0    | 30      | 10   | 40      |
| sympathetic ganglion                 | 3                                    | 38%                                           | 0      | 89   | 269   | 0       | 0    | 0       | 89   | 0       |
| testis                               | 0                                    | 0%                                            | 0      | 8    | 32    | 16      | 0    | 16      | 8    | 40      |
| thymus                               | 1                                    | 13%                                           | 0      | 0    | 82    | 67      | 0    | 149     | 0    | 44      |
| urinary                              | 4                                    | 50%                                           | 0      | 28   | 198   | 99      | 28   | 78      | 21   | 35      |
| vascular                             | 2                                    | 25%                                           | 0      | 0    | 160   | 80      | 0    | 320     | 0    | 0       |
| vesicular gland                      | 1                                    | 13%                                           | 0      | 0    | 0     | 0       | 0    | 457     | 0    | 0       |
| AVERAGE (in transcripts per million) |                                      |                                               | 7      | 18   | 107   | 46      | 14   | 79      | 11   | 46      |

C. Expression profiles for PAP-predicted NeuroD-responsive target genes

|                                      | # genes enriched in location | Percentage of genes with expression in tissue | DCC | DCX | EPHA3 | KCND3 | NOTCH1 | PLXNA2 | SYNPR | SEMA6D | UNC5C |
|--------------------------------------|------------------------------|-----------------------------------------------|-----|-----|-------|-------|--------|--------|-------|--------|-------|
| adipose tissue                       | 0                            | 0%                                            | 0   | 0   | 0     | 0     | 0      | 0      | 0     | 0      | 0     |
| blood                                | 1                            | 11%                                           | 0   | 0   | 0     | 0     | 275    | 0      | 0     | 0      | 0     |
| bone                                 | 0                            | 0%                                            | 0   | 0   | 0     | 0     | 28     | 0      | 0     | 0      | 0     |
| bone marrow                          | 0                            | 0%                                            | 0   | 0   | 0     | 0     | 13     | 13     | 0     | 0      | 0     |
| brain                                | 7                            | 78%                                           | 162 | 61  | 55    | 38    | 38     | 74     | 822   | 12     | 207   |
| connective tissue                    | 0                            | 0%                                            | 0   | 0   | 0     | 0     | 0      | 0      | 0     | 0      | 0     |
| dorsal root ganglion                 | 5                            | 56%                                           | 371 | 371 | 0     | 0     | 148    | 0      | 0     | 520    | 743   |
| embryonic tissue                     | 1                            | 11%                                           | 97  | 6   | 12    | 6     | 6      | 24     | 0     | 12     | 42    |
| endocrine                            | 4                            | 44%                                           | 0   | 88  | 0     | 0     | 176    | 0      | 58    | 58     | 0     |
| epididymis                           | 1                            | 11%                                           | 0   | 0   | 0     | 0     | 304    | 0      | 0     | 0      | 0     |
| extraembryonic tissue                | 1                            | 11%                                           | 0   | 0   | 0     | 0     | 0      | 53     | 0     | 0      | 0     |
| eye                                  | 7                            | 78%                                           | 254 | 167 | 102   | 59    | 189    | 124    | 264   | 27     | 54    |
| female genital                       | 1                            | 11%                                           | 24  | 0   | 0     | 0     | 273    | 24     | 0     | 24     | 0     |
| gastrointestinal tract               | 0                            | 0%                                            | 49  | 0   | 0     | 8     | 32     | 32     | 0     | 8      | 8     |
| head and neck                        | 5                            | 56%                                           | 92  | 92  | 237   | 7     | 69     | 168    | 23    | 30     | 84    |
| heart                                | 2                            | 22%                                           | 0   | 0   | 0     | 0     | 54     | 72     | 0     | 72     | 54    |
| inner ear                            | 2                            | 22%                                           | 25  | 0   | 25    | 0     | 126    | 50     | 25    | 25     | 25    |
| limb                                 | 2                            | 22%                                           | 0   | 0   | 67    | 0     | 167    | 33     | 0     | 0      | 33    |
| liver                                | 1                            | 11%                                           | 0   | 8   | 0     | 0     | 26     | 8      | 0     | 71     | 26    |
| lung                                 | 2                            | 22%                                           | 0   | 19  | 48    | 0     | 67     | 9      | 28    | 38     | 19    |
| lymph node                           | 1                            | 11%                                           | 0   | 0   | 63    | 0     | 0      | 0      | 0     | 0      | 0     |
| mammary gland                        | 0                            | 0%                                            | 0   | 0   | 3     | 3     | 74     | 3      | 0     | 6      | 16    |
| muscle                               | 2                            | 22%                                           | 0   | 0   | 0     | 0     | 37     | 112    | 0     | 37     | 0     |
| pancreas                             | 6                            | 67%                                           | 0   | 0   | 218   | 27    | 100    | 145    | 9     | 118    | 118   |
| prostate                             | 1                            | 11%                                           | 32  | 0   | 64    | 0     | 32     | 0      | 0     | 32     | 32    |
| skin                                 | 1                            | 11%                                           | 0   | 0   | 11    | 0     | 11     | 66     | 11    | 0      | 0     |
| spinal cord                          | 6                            | 67%                                           | 487 | 374 | 149   | 37    | 0      | 299    | 374   | 0      | 0     |
| spleen                               | 3                            | 33%                                           | 0   | 0   | 50    | 160   | 120    | 10     | 10    | 20     | 30    |
| sympathetic ganglion                 | 3                            | 33%                                           | 89  | 269 | 0     | 0     | 179    | 0      | 0     | 0      | 89    |
| testis                               | 0                            | 0%                                            | 8   | 0   | 0     | 8     | 24     | 8      | 0     | 16     | 40    |
| thymus                               | 2                            | 22%                                           | 0   | 0   | 14    | 0     | 261    | 14     | 67    | 14     | 0     |
| urinary                              | 1                            | 11%                                           | 0   | 7   | 7     | 14    | 28     | 7      | 14    | 7      | 35    |
| vascular                             | 2                            | 22%                                           | 0   | 0   | 0     | 80    | 80     | 0      | 0     | 0      | 400   |
| vesicular gland                      | 0                            | 0%                                            | 0   | 0   | 0     | 0     | 0      | 0      | 0     | 0      | 0     |
| AVERAGE (in transcripts per million) |                              |                                               | 50  | 43  | 33    | 13    | 86     | 40     | 50    | 34     | 60    |

**D. Expression profiles of PAP-predicted non-responsive target genes**

|                                      | # genes enriched in tissue | Percentage of genes with expression in tissue | DAB1 | EDA | GAS7 | ICA1 | NRXN1 | ODZ1 | PHF17 | SLIT2 | SLIT3 |
|--------------------------------------|----------------------------|-----------------------------------------------|------|-----|------|------|-------|------|-------|-------|-------|
| adipose tissue                       | 0                          | 0%                                            | 0    | 0   | 0    | 0    | 0     | 0    | 0     | 0     | 0     |
| blood                                | 1                          | 11%                                           | 0    | 0   | 44   | 11   | 0     | 0    | 44    | 0     | 0     |
| bone                                 | 1                          | 11%                                           | 0    | 0   | 0    | 0    | 0     | 0    | 113   | 28    | 28    |
| bone marrow                          | 3                          | 33%                                           | 0    | 13  | 122  | 27   | 238   | 0    | 170   | 115   | 0     |
| brain                                | 6                          | 67%                                           | 155  | 12  | 81   | 120  | 419   | 81   | 38    | 35    | 45    |
| connective tissue                    | 1                          | 11%                                           | 0    | 0   | 0    | 49   | 0     | 0    | 49    | 49    | 0     |
| dorsal root ganglion                 | 3                          | 33%                                           | 0    | 0   | 74   | 0    | 0     | 74   | 74    | 594   | 0     |
| embryonic tissue                     | 5                          | 56%                                           | 24   | 30  | 0    | 42   | 6     | 18   | 231   | 60    | 109   |
| endocrine                            | 2                          | 22%                                           | 0    | 0   | 0    | 88   | 58    | 0    | 147   | 29    | 29    |
| epididymis                           | 2                          | 22%                                           | 0    | 0   | 0    | 0    | 0     | 0    | 304   | 609   | 0     |
| extraembryonic tissue                | 2                          | 22%                                           | 0    | 0   | 0    | 0    | 0     | 0    | 360   | 0     | 160   |
| eye                                  | 3                          | 33%                                           | 145  | 5   | 59   | 16   | 54    | 10   | 86    | 194   | 5     |
| female genital                       | 3                          | 33%                                           | 49   | 24  | 74   | 0    | 0     | 0    | 224   | 24    | 24    |
| gastrointestinal tract               | 3                          | 33%                                           | 82   | 0   | 8    | 74   | 0     | 41   | 41    | 24    | 24    |
| head and neck                        | 6                          | 67%                                           | 38   | 23  | 7    | 30   | 76    | 30   | 122   | 207   | 46    |
| heart                                | 1                          | 11%                                           | 0    | 0   | 0    | 54   | 0     | 0    | 90    | 0     | 0     |
| inner ear                            | 0                          | 0%                                            | 0    | 0   | 25   | 0    | 25    | 0    | 0     | 101   | 25    |
| limb                                 | 3                          | 33%                                           | 0    | 335 | 134  | 0    | 0     | 33   | 0     | 33    | 0     |
| liver                                | 0                          | 0%                                            | 0    | 26  | 0    | 8    | 0     | 0    | 44    | 0     | 8     |
| lung                                 | 2                          | 22%                                           | 0    | 48  | 28   | 19   | 9     | 0    | 48    | 154   | 19    |
| lymph node                           | 1                          | 11%                                           | 0    | 0   | 0    | 0    | 0     | 0    | 127   | 0     | 0     |
| mammary gland                        | 1                          | 11%                                           | 0    | 12  | 3    | 51   | 0     | 0    | 77    | 77    | 41    |
| muscle                               | 2                          | 22%                                           | 0    | 0   | 0    | 0    | 0     | 0    | 149   | 373   | 0     |
| pancreas                             | 5                          | 56%                                           | 0    | 0   | 0    | 72   | 72    | 0    | 164   | 1093  | 109   |
| prostate                             | 3                          | 33%                                           | 0    | 129 | 0    | 0    | 0     | 32   | 0     | 0     | 225   |
| skin                                 | 4                          | 44%                                           | 0    | 22  | 55   | 77   | 0     | 0    | 121   | 66    | 155   |
| spinal cord                          | 5                          | 56%                                           | 37   | 0   | 112  | 37   | 712   | 0    | 74    | 112   | 112   |
| spleen                               | 2                          | 22%                                           | 40   | 0   | 70   | 0    | 10    | 10   | 90    | 0     | 0     |
| sympathetic ganglion                 | 4                          | 44%                                           | 0    | 89  | 0    | 0    | 448   | 0    | 0     | 448   | 89    |
| testis                               | 2                          | 22%                                           | 16   | 8   | 64   | 97   | 32    | 0    | 97    | 56    | 40    |
| thymus                               | 2                          | 22%                                           | 0    | 7   | 7    | 22   | 14    | 37   | 112   | 0     | 37    |
| urinary                              | 2                          | 22%                                           | 35   | 7   | 7    | 28   | 0     | 0    | 85    | 21    | 56    |
| vascular                             | 5                          | 56%                                           | 0    | 160 | 160  | 0    | 0     | 80   | 480   | 0     | 80    |
| vesicular gland                      | 0                          | 0%                                            | 0    | 0   | 0    | 0    | 0     | 0    | 0     | 0     | 0     |
|                                      |                            | 0%                                            |      |     |      |      |       |      |       |       |       |
| AVERAGE (in transcripts per million) |                            |                                               | 18   | 28  | 33   | 27   | 64    | 13   | 111   | 132   | 43    |

**E. Summary of expression profiles for 21 Ngn/NeuroD responsive target genes**

|                        | 12 experimental targets: # of genes with expression in tissue |                        | 9 PAP derived/confirmed targets: # genes enriched in location | Sum genes enriched in location |                        | SUM TOTAL: Percentage of genes enriched in location |
|------------------------|---------------------------------------------------------------|------------------------|---------------------------------------------------------------|--------------------------------|------------------------|-----------------------------------------------------|
| adipose tissue         | 1                                                             | adipose tissue         | 0                                                             | 1                              | adipose tissue         | 5%                                                  |
| blood                  | 0                                                             | blood                  | 1                                                             | 1                              | blood                  | 5%                                                  |
| bone                   | 1                                                             | bone                   | 0                                                             | 1                              | bone                   | 5%                                                  |
| bone marrow            | 0                                                             | bone marrow            | 0                                                             | 0                              | bone marrow            | 0%                                                  |
| brain                  | 7                                                             | brain                  | 7                                                             | 14                             | brain                  | 67%                                                 |
| connective tissue      | 3                                                             | connective tissue      | 0                                                             | 3                              | connective tissue      | 14%                                                 |
| dorsal root ganglion   | 6                                                             | dorsal root ganglion   | 5                                                             | 11                             | dorsal root ganglion   | 52%                                                 |
| embryonic tissue       | 2                                                             | embryonic tissue       | 1                                                             | 3                              | embryonic tissue       | 14%                                                 |
| endocrine              | 3                                                             | endocrine              | 4                                                             | 7                              | endocrine              | 33%                                                 |
| epididymis             | 0                                                             | epididymis             | 1                                                             | 1                              | epididymis             | 5%                                                  |
| extraembryonic tissue  | 1                                                             | extraembryonic tissue  | 1                                                             | 2                              | extraembryonic tissue  | 10%                                                 |
| eye                    | 7                                                             | eye                    | 7                                                             | 14                             | eye                    | 67%                                                 |
| female genital         | 1                                                             | female genital         | 1                                                             | 2                              | female genital         | 10%                                                 |
| gastrointestinal tract | 1                                                             | gastrointestinal tract | 0                                                             | 1                              | gastrointestinal tract | 5%                                                  |
| head and neck          | 8                                                             | head and neck          | 5                                                             | 13                             | head and neck          | 62%                                                 |
| heart                  | 2                                                             | heart                  | 2                                                             | 4                              | heart                  | 19%                                                 |
| inner ear              | 4                                                             | inner ear              | 2                                                             | 6                              | inner ear              | 29%                                                 |
| limb                   | 0                                                             | limb                   | 2                                                             | 2                              | limb                   | 10%                                                 |
| liver                  | 1                                                             | liver                  | 1                                                             | 2                              | liver                  | 10%                                                 |
| lung                   | 3                                                             | lung                   | 2                                                             | 5                              | lung                   | 24%                                                 |
| lymph node             | 2                                                             | lymph node             | 1                                                             | 3                              | lymph node             | 14%                                                 |
| mammary gland          | 1                                                             | mammary gland          | 0                                                             | 1                              | mammary gland          | 5%                                                  |
| muscle                 | 1                                                             | muscle                 | 2                                                             | 3                              | muscle                 | 14%                                                 |
| pancreas               | 4                                                             | pancreas               | 6                                                             | 10                             | pancreas               | 48%                                                 |
| prostate               | 1                                                             | prostate               | 1                                                             | 2                              | prostate               | 10%                                                 |
| skin                   | 2                                                             | skin                   | 1                                                             | 3                              | skin                   | 14%                                                 |
| spinal cord            | 7                                                             | spinal cord            | 6                                                             | 13                             | spinal cord            | 62%                                                 |
| spleen                 | 1                                                             | spleen                 | 3                                                             | 4                              | spleen                 | 19%                                                 |
| sympathetic ganglion   | 2                                                             | sympathetic ganglion   | 3                                                             | 5                              | sympathetic ganglion   | 24%                                                 |
| testis                 | 1                                                             | testis                 | 0                                                             | 1                              | testis                 | 5%                                                  |
| thymus                 | 1                                                             | thymus                 | 2                                                             | 3                              | thymus                 | 14%                                                 |
| urinary                | 3                                                             | urinary                | 1                                                             | 4                              | urinary                | 19%                                                 |
| vascular               | 2                                                             | vascular               | 2                                                             | 4                              | vascular               | 19%                                                 |
| vesicular gland        | 0                                                             | vesicular gland        | 0                                                             | 0                              | vesicular gland        | 0%                                                  |

**F. Summary of expression profiles for 17 non-responsive target genes**

|                        | 8 experimental targets: # of genes with expression in tissue |                        | 9 PAP derived/confirmed targets: # genes enriched in location | Sum genes enriched in location |                        | SUM TOTAL: Percentage of genes enriched in location |
|------------------------|--------------------------------------------------------------|------------------------|---------------------------------------------------------------|--------------------------------|------------------------|-----------------------------------------------------|
| adipose tissue         | 0                                                            | adipose tissue         | 0                                                             | 0                              | adipose tissue         | 0%                                                  |
| blood                  | 2                                                            | blood                  | 1                                                             | 3                              | blood                  | 17%                                                 |
| bone                   | 4                                                            | bone                   | 1                                                             | 5                              | bone                   | 28%                                                 |
| bone marrow            | 1                                                            | bone marrow            | 3                                                             | 4                              | bone marrow            | 22%                                                 |
| brain                  | 5                                                            | brain                  | 6                                                             | 11                             | brain                  | 61%                                                 |
| connective tissue      | 0                                                            | connective tissue      | 1                                                             | 1                              | connective tissue      | 6%                                                  |
| dorsal root ganglion   | 2                                                            | dorsal root ganglion   | 3                                                             | 5                              | dorsal root ganglion   | 28%                                                 |
| embryonic tissue       | 2                                                            | embryonic tissue       | 5                                                             | 7                              | embryonic tissue       | 39%                                                 |
| endocrine              | 3                                                            | endocrine              | 2                                                             | 5                              | endocrine              | 28%                                                 |
| epididymis             | 0                                                            | epididymis             | 2                                                             | 2                              | epididymis             | 11%                                                 |
| extraembryonic tissue  | 1                                                            | extraembryonic tissue  | 2                                                             | 3                              | extraembryonic tissue  | 17%                                                 |
| eye                    | 3                                                            | eye                    | 3                                                             | 6                              | eye                    | 33%                                                 |
| female genital         | 5                                                            | female genital         | 3                                                             | 8                              | female genital         | 44%                                                 |
| gastrointestinal tract | 1                                                            | gastrointestinal tract | 3                                                             | 4                              | gastrointestinal tract | 22%                                                 |
| head and neck          | 1                                                            | head and neck          | 6                                                             | 7                              | head and neck          | 39%                                                 |
| heart                  | 3                                                            | heart                  | 1                                                             | 4                              | heart                  | 22%                                                 |
| inner ear              | 3                                                            | inner ear              | 0                                                             | 3                              | inner ear              | 17%                                                 |
| limb                   | 4                                                            | limb                   | 3                                                             | 7                              | limb                   | 39%                                                 |
| liver                  | 2                                                            | liver                  | 0                                                             | 2                              | liver                  | 11%                                                 |
| lung                   | 7                                                            | lung                   | 2                                                             | 9                              | lung                   | 50%                                                 |
| lymph node             | 1                                                            | lymph node             | 1                                                             | 2                              | lymph node             | 11%                                                 |
| mammary gland          | 3                                                            | mammary gland          | 1                                                             | 4                              | mammary gland          | 22%                                                 |
| muscle                 | 2                                                            | muscle                 | 2                                                             | 4                              | muscle                 | 22%                                                 |
| pancreas               | 1                                                            | pancreas               | 5                                                             | 6                              | pancreas               | 33%                                                 |
| prostate               | 1                                                            | prostate               | 3                                                             | 4                              | prostate               | 22%                                                 |
| skin                   | 7                                                            | skin                   | 4                                                             | 11                             | skin                   | 61%                                                 |
| spinal cord            | 2                                                            | spinal cord            | 5                                                             | 7                              | spinal cord            | 39%                                                 |
| spleen                 | 1                                                            | spleen                 | 2                                                             | 3                              | spleen                 | 17%                                                 |
| sympathetic ganglion   | 3                                                            | sympathetic ganglion   | 4                                                             | 7                              | sympathetic ganglion   | 39%                                                 |
| testis                 | 0                                                            | testis                 | 2                                                             | 2                              | testis                 | 11%                                                 |
| thymus                 | 1                                                            | thymus                 | 2                                                             | 3                              | thymus                 | 17%                                                 |
| urinary                | 4                                                            | urinary                | 2                                                             | 6                              | urinary                | 33%                                                 |
| vascular               | 2                                                            | vascular               | 5                                                             | 7                              | vascular               | 39%                                                 |
| vesicular gland        | 1                                                            | vesicular gland        | 0                                                             | 1                              | vesicular gland        | 6%                                                  |

Seo\_Supplemental Fig. S5

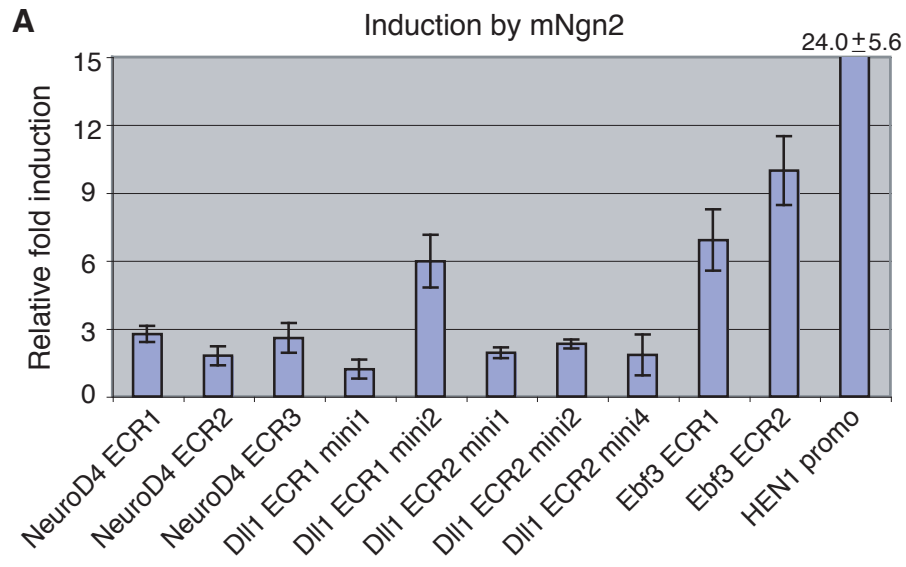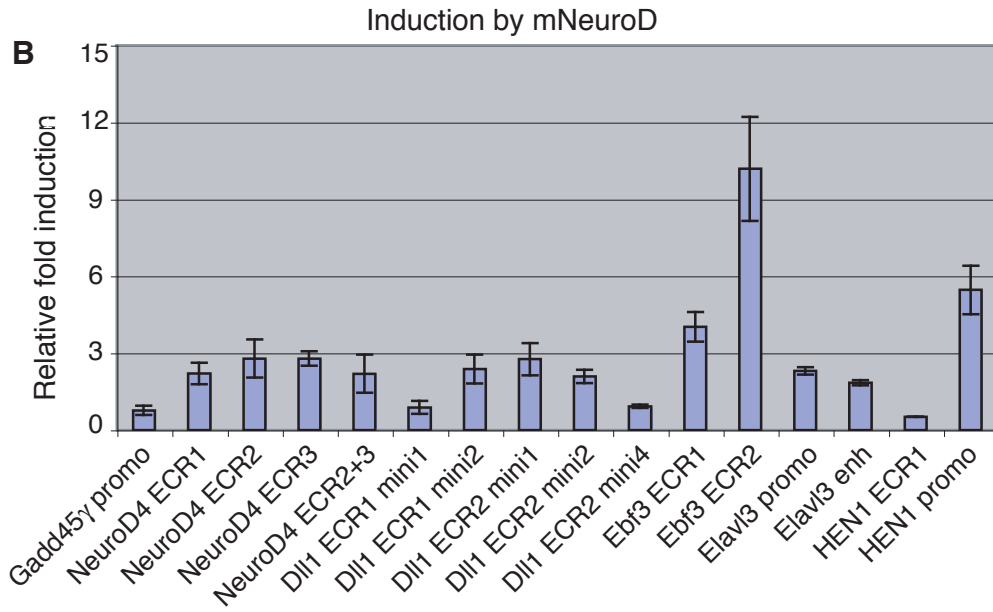

Seo\_Supplemental Fig. S6.

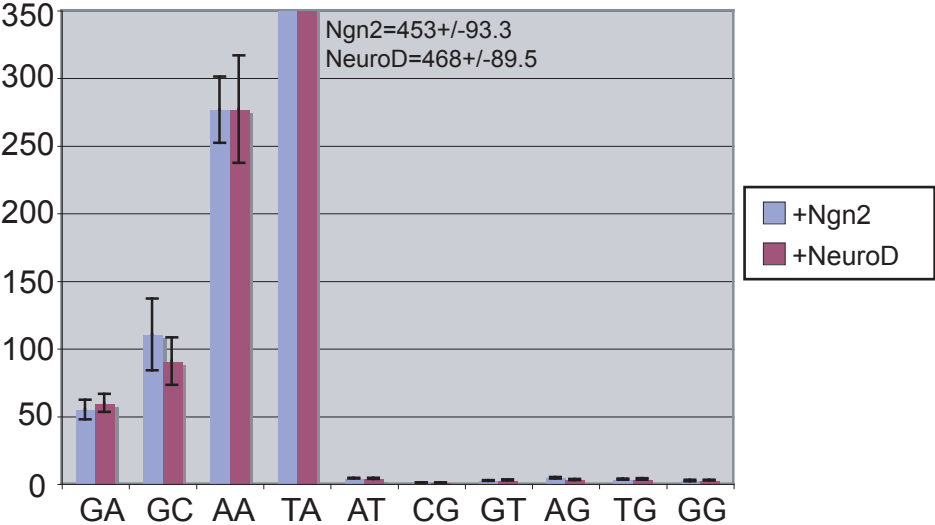



**A**

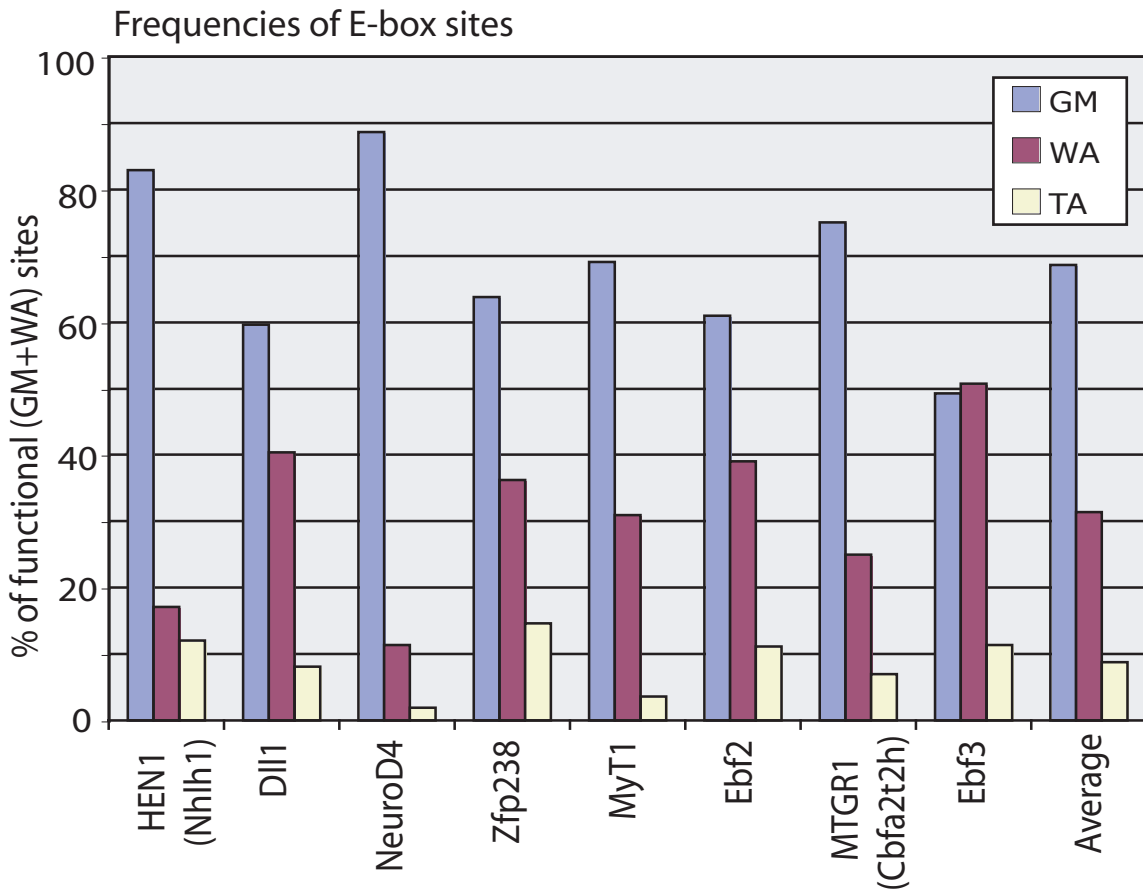

**B**

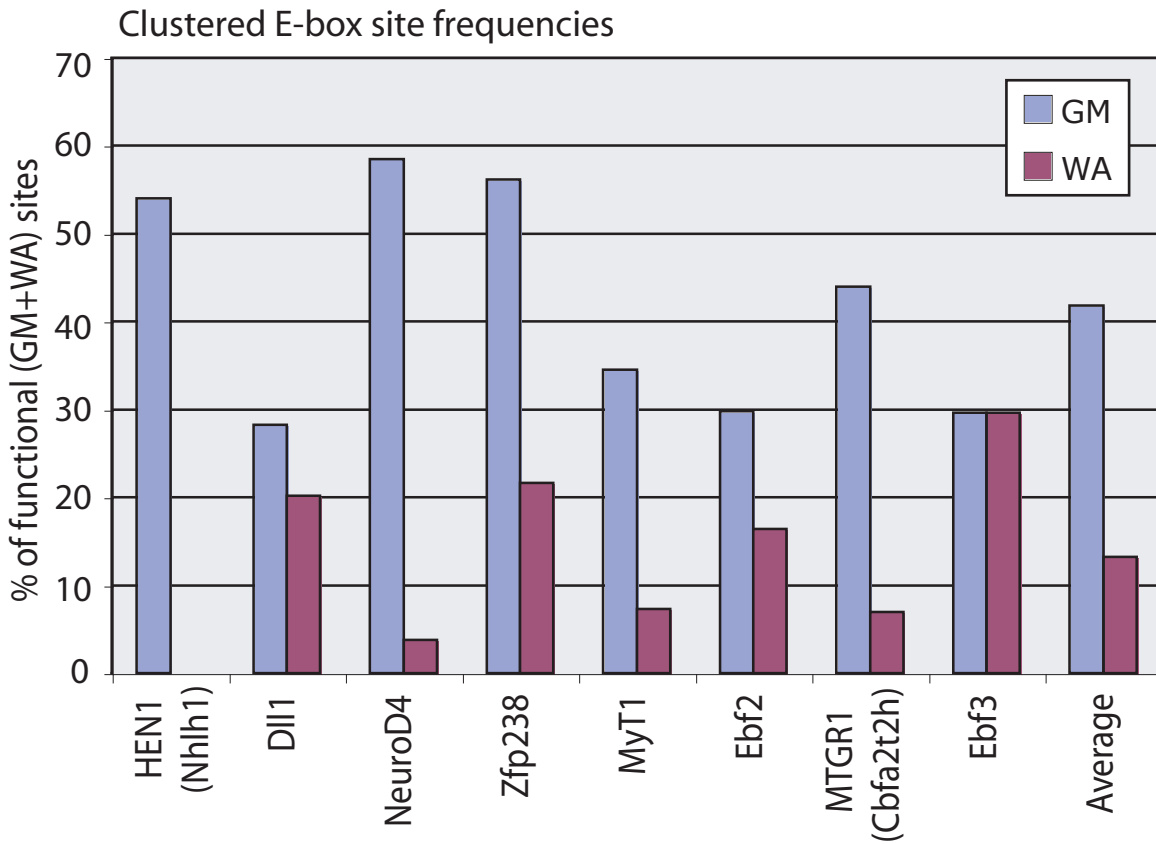

Seo\_Supplemental Figure S7.

**(C) Quantitation of E-box frequencies.** Raw numerical data and calculations of frequency of conserved E-boxes seen in pairwise comparisons of each locus between species (with mouse as the base organism).

| <b>DII1</b>                        |                          |                                 |                           |                          |                              |                           |                          |
|------------------------------------|--------------------------|---------------------------------|---------------------------|--------------------------|------------------------------|---------------------------|--------------------------|
| mouse base                         | GM-type<br>total # sites | GM-type # of<br>clustered sites | GM sites in<br>WA cluster | WA-type<br>total # sites | WA-type #<br>clustered sites | WA sites in<br>GM cluster | TA-type<br>total # sites |
| human                              | 18                       | 11                              | 1                         | 12                       | 6                            | 3                         | 1                        |
| opossum                            | 13                       | 6                               | 7                         | 10                       | 6                            | 4                         | 2                        |
| dog                                | 11                       | 6                               | 5                         | 7                        | 4                            | 3                         | 2                        |
| chick                              | 7                        | 2                               | 0                         | 3                        | 0                            | 1                         | 2                        |
| frog                               | 6                        | 3                               | 1                         | 5                        | 2                            | 1                         | 1                        |
| fugu                               | 0                        | 0                               | 0                         | 0                        | 0                            | 0                         | 0                        |
| zebrafish                          | 4                        | 0                               | 1                         | 3                        | 2                            | 0                         | 0                        |
| Totals                             | 59                       | 28                              | 15                        | 40                       | 20                           | 12                        | 8                        |
| Total functional (GM+WA)<br>E-box= |                          | 99                              |                           |                          |                              |                           |                          |

| <b>DII1 Summary of E-box frequency</b>  |           |
|-----------------------------------------|-----------|
| <b>% GM=</b><br>(as %GM+WA)             | <b>60</b> |
| <b>% WA=</b><br>(as %GM+WA)             | <b>40</b> |
| <b>% GM clustered=</b><br>(as %GM+WA)   | <b>28</b> |
| <b>% WA clustered=</b><br>(as %GM+WA)   | <b>20</b> |
| <b>% GM in WA cluster=</b><br>(as % GM) | <b>25</b> |
| <b>% WA in GM cluster=</b><br>(as % WA) | <b>30</b> |
| <b>(% TA)</b><br>(as %GM+WA)            | <b>08</b> |

| <b>Ebf2</b>                        |                          |                                 |                           |                          |                              |                           |                          |
|------------------------------------|--------------------------|---------------------------------|---------------------------|--------------------------|------------------------------|---------------------------|--------------------------|
| mouse base                         | GM-type<br>total # sites | GM-type # of<br>clustered sites | GM sites in<br>WA cluster | WA-type<br>total # sites | WA-type #<br>clustered sites | WA sites in<br>GM cluster | TA-type<br>total # sites |
| human                              | 69                       | 35                              | 10                        | 41                       | 18                           | 13                        | 10                       |
| opossum                            | 29                       | 13                              | 3                         | 22                       | 9                            | 5                         | 8                        |
| dog                                | 62                       | 30                              | 15                        | 42                       | 17                           | 13                        | 11                       |
| chick                              | 21                       | 11                              | 3                         | 12                       | 4                            | 3                         | 4                        |
| frog                               | 4                        | 2                               | 1                         | 2                        | 2                            | 0                         | 1                        |
| fugu                               | 1                        | 0                               | 0                         | 0                        | 0                            | 0                         | 0                        |
| zebrafish                          | 0                        | 0                               | 0                         | 0                        | 0                            | 0                         | 0                        |
| Totals                             | 186                      | 91                              | 32                        | 119                      | 50                           | 34                        | 34                       |
| Total functional (GM+WA)<br>E-box= |                          | 305                             |                           |                          |                              |                           |                          |

| <b>Ebf2 Summary of E-box frequency</b>  |           |
|-----------------------------------------|-----------|
| <b>% GM=</b><br>(as %GM+WA)             | <b>61</b> |
| <b>% WA=</b><br>(as %GM+WA)             | <b>39</b> |
| <b>% GM clustered=</b><br>(as %GM+WA)   | <b>30</b> |
| <b>% WA clustered=</b><br>(as %GM+WA)   | <b>16</b> |
| <b>% GM in WA cluster=</b><br>(as % GM) | <b>17</b> |
| <b>% WA in GM cluster=</b><br>(as % WA) | <b>29</b> |
| <b>(% TA)</b><br>(as %GM+WA)            | <b>11</b> |

| <b>Ebf3</b>                        |                          |                                 |                           |                          |                              |                           |                          |
|------------------------------------|--------------------------|---------------------------------|---------------------------|--------------------------|------------------------------|---------------------------|--------------------------|
| mouse base                         | GM-type<br>total # sites | GM-type # of<br>clustered sites | GM sites in<br>WA cluster | WA-type<br>total # sites | WA-type #<br>clustered sites | WA sites in<br>GM cluster | TA-type<br>total # sites |
| human                              | 64                       | 38                              | 23                        | 68                       | 44                           | 23                        | 11                       |
| opossum (1)                        | 34                       | 16                              | 3                         | 34                       | 22                           | 1                         | 10                       |
| dog                                | 55                       | 31                              | 33                        | 59                       | 33                           | 10                        | 11                       |
| chick                              | 39                       | 27                              | 18                        | 46                       | 30                           | 15                        | 9                        |
| frog                               | 35                       | 22                              | 9                         | 34                       | 20                           | 9                         | 8                        |
| fugu                               | 11                       | 7                               | 1                         | 11                       | 2                            | 4                         | 7                        |
| zebrafish                          | 17                       | 12                              | 2                         | 10                       | 2                            | 4                         | 3                        |
| Totals                             | 255                      | 153                             | 89                        | 262                      | 153                          | 66                        | 59                       |
| Total functional (GM+WA)<br>E-box= |                          | 517                             |                           |                          |                              |                           |                          |

| <b>Ebf3 Summary of E-box frequency</b>  |           |
|-----------------------------------------|-----------|
| <b>% GM=</b><br>(as %GM+WA)             | <b>49</b> |
| <b>% WA=</b><br>(as %GM+WA)             | <b>51</b> |
| <b>% GM clustered=</b><br>(as %GM+WA)   | <b>30</b> |
| <b>% WA clustered=</b><br>(as %GM+WA)   | <b>30</b> |
| <b>% GM in WA cluster=</b><br>(as % GM) | <b>35</b> |
| <b>% WA in GM cluster=</b><br>(as % WA) | <b>25</b> |
| <b>(% TA)</b><br>(as %GM+WA)            | <b>11</b> |

| <b>MTGR1/Cbfa2t2h</b>              |                          |                                 |                           |                          |                              |                           |                          |
|------------------------------------|--------------------------|---------------------------------|---------------------------|--------------------------|------------------------------|---------------------------|--------------------------|
| mouse base                         | GM-type<br>total # sites | GM-type # of<br>clustered sites | GM sites in<br>WA cluster | WA-type<br>total # sites | WA-type #<br>clustered sites | WA sites in<br>GM cluster | TA-type<br>total # sites |
| human                              | 29                       | 16                              | 2                         | 13                       | 5                            | 4                         | 3                        |
| opossum                            | 8                        | 6                               | 0                         | 1                        | 0                            | 1                         | 1                        |
| dog                                | 33                       | 20                              | 2                         | 10                       | 2                            | 4                         | 2                        |
| chick                              | 4                        | 2                               | 0                         | 1                        | 0                            | 0                         | 1                        |
| frog                               | 0                        | 0                               | 0                         | 0                        | 0                            | 0                         | 0                        |
| fugu                               | 0                        | 0                               | 0                         | 0                        | 0                            | 0                         | 0                        |
| zebrafish                          | 1                        | 0                               | 0                         | 0                        | 0                            | 0                         | 0                        |
| Totals                             | 75                       | 44                              | 4                         | 25                       | 7                            | 9                         | 7                        |
| Total functional (GM+WA)<br>E-box= |                          | 100                             |                           |                          |                              |                           |                          |

| <b>MTGR1/Cbfa2t2h Summary of E-box frequency</b> |           |
|--------------------------------------------------|-----------|
| <b>% GM=</b><br>(as %GM+WA)                      | <b>75</b> |
| <b>% WA=</b><br>(as %GM+WA)                      | <b>25</b> |
| <b>% GM clustered=</b><br>(as %GM+WA)            | <b>44</b> |
| <b>% WA clustered=</b><br>(as %GM+WA)            | <b>07</b> |
| <b>% GM in WA cluster=</b><br>(as % GM)          | <b>05</b> |
| <b>% WA in GM cluster=</b><br>(as % WA)          | <b>36</b> |
| <b>(% TA)</b><br>(as %GM+WA)                     | <b>07</b> |

| <b>MyT1</b>                        |                          |                                 |                           |                          |                              |                           |                          |
|------------------------------------|--------------------------|---------------------------------|---------------------------|--------------------------|------------------------------|---------------------------|--------------------------|
| mouse base                         | GM-type<br>total # sites | GM-type # of<br>clustered sites | GM sites in<br>WA cluster | WA-type<br>total # sites | WA-type #<br>clustered sites | WA sites in<br>GM cluster | TA-type<br>total # sites |
| human                              | 18                       | 7                               | 3                         | 10                       | 4                            | 3                         | 1                        |
| opossum                            | 4                        | 2                               | 0                         | 1                        | 0                            | 0                         | 0                        |
| dog                                | 13                       | 7                               | 0                         | 5                        | 0                            | 2                         | 1                        |
| chick                              | 3                        | 3                               | 0                         | 1                        | 0                            | 0                         | 0                        |
| frog                               | 0                        | 0                               | 0                         | 0                        | 0                            | 0                         | 0                        |
| fugu                               | 0                        | 0                               | 0                         | 0                        | 0                            | 0                         | 0                        |
| zebrafish                          | 0                        | 0                               | 0                         | 0                        | 0                            | 0                         | 0                        |
| Sums                               | 38                       | 19                              | 3                         | 17                       | 4                            | 5                         | 2                        |
| Total functional (GM+WA)<br>E-box= |                          | 55                              |                           |                          |                              |                           |                          |

| <b>MyT1 Summary of E-box frequency</b>  |           |
|-----------------------------------------|-----------|
| <b>% GM=</b><br>(as %GM+WA)             | <b>69</b> |
| <b>% WA=</b><br>(as %GM+WA)             | <b>31</b> |
| <b>% GM clustered=</b><br>(as %GM+WA)   | <b>35</b> |
| <b>% WA clustered=</b><br>(as %GM+WA)   | <b>07</b> |
| <b>% GM in WA cluster=</b><br>(as % GM) | <b>08</b> |
| <b>% WA in GM cluster=</b><br>(as % WA) | <b>29</b> |
| <b>(% TA)</b><br>(as %GM+WA)            | <b>04</b> |

| <b>NeuroD4</b>                     |                          |                                 |                           |                          |                              |                           |                          |
|------------------------------------|--------------------------|---------------------------------|---------------------------|--------------------------|------------------------------|---------------------------|--------------------------|
| mouse base                         | GM-type<br>total # sites | GM-type # of<br>clustered sites | GM sites in<br>WA cluster | WA-type<br>total # sites | WA-type #<br>clustered sites | WA sites in<br>GM cluster | TA-type<br>total # sites |
| human                              | 21                       | 14                              | 2                         | 4                        | 2                            | 3                         | 1                        |
| opossum                            | 8                        | 3                               | 0                         | 0                        | 0                            | 0                         | 0                        |
| dog                                | 18                       | 14                              | 0                         | 2                        | 0                            | 1                         | 0                        |
| chick (2)                          | did not align with mouse |                                 |                           |                          |                              |                           |                          |
| frog (2)                           | did not align with mouse |                                 |                           |                          |                              |                           |                          |
| fugu (2)                           | did not align with mouse |                                 |                           |                          |                              |                           |                          |
| zebrafish (2)                      | did not align with mouse |                                 |                           |                          |                              |                           |                          |
| Totals                             | 47                       | 31                              | 2                         | 6                        | 2                            | 4                         | 1                        |
| Total functional (GM+WA)<br>E-box= |                          | 53                              |                           |                          |                              |                           |                          |

| <b>NeuroD4 Summary of E-box frequency</b> |           |
|-------------------------------------------|-----------|
| <b>% GM=</b><br>(as %GM+WA)               | <b>89</b> |
| <b>% WA=</b><br>(as %GM+WA)               | <b>11</b> |
| <b>% GM clustered=</b><br>(as %GM+WA)     | <b>58</b> |
| <b>% WA clustered=</b><br>(as %GM+WA)     | <b>04</b> |
| <b>% GM in WA cluster=</b><br>(as % GM)   | <b>04</b> |
| <b>% WA in GM cluster=</b><br>(as % WA)   | <b>67</b> |
| <b>(% TA)</b><br>(as %GM+WA)              | <b>02</b> |

| <b>HEN1/Nhlh1</b>                  |                          |                                 |                           |                          |                              |                           |                          |
|------------------------------------|--------------------------|---------------------------------|---------------------------|--------------------------|------------------------------|---------------------------|--------------------------|
| mouse base                         | GM-type<br>total # sites | GM-type # of<br>clustered sites | GM sites in<br>WA cluster | WA-type<br>total # sites | WA-type #<br>clustered sites | WA sites in<br>GM cluster | TA-type<br>total # sites |
| human (2)                          | 10                       | 8                               | 0                         | 3                        | 0                            | 0                         | 2                        |
| opossum                            | 9                        | 7                               | 0                         | 2                        | 0                            | 0                         | 2                        |
| dog                                | 13                       | 7                               | 0                         | 2                        | 0                            | 0                         | 1                        |
| chick                              | 2                        | 0                               | 0                         | 0                        | 0                            | 0                         | 0                        |
| frog                               | 0                        | 0                               | 0                         | 0                        | 0                            | 0                         | 0                        |
| fugu                               | 0                        | 0                               | 0                         | 0                        | 0                            | 0                         | 0                        |
| zebrafish                          | 0                        | 0                               | 0                         | 0                        | 0                            | 0                         | 0                        |
| Totals                             | 34                       | 22                              | 0                         | 7                        | 0                            | 0                         | 5                        |
| Total functional (GM+WA)<br>E-box= |                          | 41                              |                           |                          |                              |                           |                          |

| <b>HEN1/Nhlh1 Summary of E-box frequency</b> |           |
|----------------------------------------------|-----------|
| <b>% GM=</b><br>(as %GM+WA)                  | <b>83</b> |
| <b>% WA=</b><br>(as %GM+WA)                  | <b>17</b> |
| <b>% GM clustered=</b><br>(as %GM+WA)        | <b>54</b> |
| <b>% WA clustered=</b><br>(as %GM+WA)        | <b>00</b> |
| <b>% GM in WA cluster=</b><br>(as % GM)      | <b>00</b> |
| <b>% WA in GM cluster=</b><br>(as % WA)      | <b>00</b> |
| <b>(% TA)</b><br>(as %GM+WA)                 | <b>12</b> |



| <b>Zfp238</b>                      |                          |                                 |                           |                          |                              |                           |                          |
|------------------------------------|--------------------------|---------------------------------|---------------------------|--------------------------|------------------------------|---------------------------|--------------------------|
| mouse base                         | GM-type<br>total # sites | GM-type # of<br>clustered sites | GM sites in<br>WA cluster | WA-type<br>total # sites | WA-type #<br>clustered sites | WA sites in<br>GM cluster | TA-type<br>total # sites |
| human                              | 32                       | 27                              | 13                        | 21                       | 17                           | 8                         | 6                        |
| opossum                            | 21                       | 18                              | 4                         | 12                       | 6                            | 6                         | 5                        |
| dog                                | 30                       | 26                              | 5                         | 15                       | 4                            | 8                         | 5                        |
| chick                              | 11                       | 10                              | 0                         | 8                        | 4                            | 4                         | 3                        |
| frog                               | 5                        | 5                               | 5                         | 2                        | 2                            | 2                         | 2                        |
| fugu                               | 5                        | 5                               | 5                         | 2                        | 2                            | 2                         | 2                        |
| zebrafish                          | 5                        | 5                               | 5                         | 2                        | 2                            | 2                         | 2                        |
| Totals                             | 109                      | 96                              | 37                        | 62                       | 37                           | 32                        | 25                       |
| Total functional (GM+WA)<br>E-box= |                          | 171                             |                           |                          |                              |                           |                          |

| <b>Zfp238 Summary of E-box frequency</b> |           |
|------------------------------------------|-----------|
| <b>% GM=</b><br>(as %GM+WA)              | <b>64</b> |
| <b>% WA=</b><br>(as %GM+WA)              | <b>36</b> |
| <b>% GM clustered=</b><br>(as %GM+WA)    | <b>56</b> |
| <b>% WA clustered=</b><br>(as %GM+WA)    | <b>22</b> |
| <b>% GM in WA cluster=</b><br>(as % GM)  | <b>34</b> |
| <b>% WA in GM cluster=</b><br>(as % WA)  | <b>52</b> |
| <b>(% TA)</b><br>(as %GM+WA)             | <b>15</b> |

(1) For Ebf3 locus mouse/ opossum syntenic alignment, 4 partial alignments spanned the region of the locus including 50kb 5', ORF+introns, and 50kb 3' sequences. Sites were summed across these 4 alignments

(2) For NeuroD locus, mouse locus did not have sufficient synteny with chicken, frog, fugu or zebrafish loci for rVista analysis to be performed

(3) For Nhlh1 locus human/mouse alignment, only 25 kb of 5' and 3' sequences was analyzed as ECR browser could not perform Rvista site analysis with longer alignments(4)

Zfp238 locus human/mouse was analyzed as two 5' and 3' alignment reads as Rvista site analysis could not be done on a single 100+ kb alignment

Seo\_Supplemental Fig. S8.

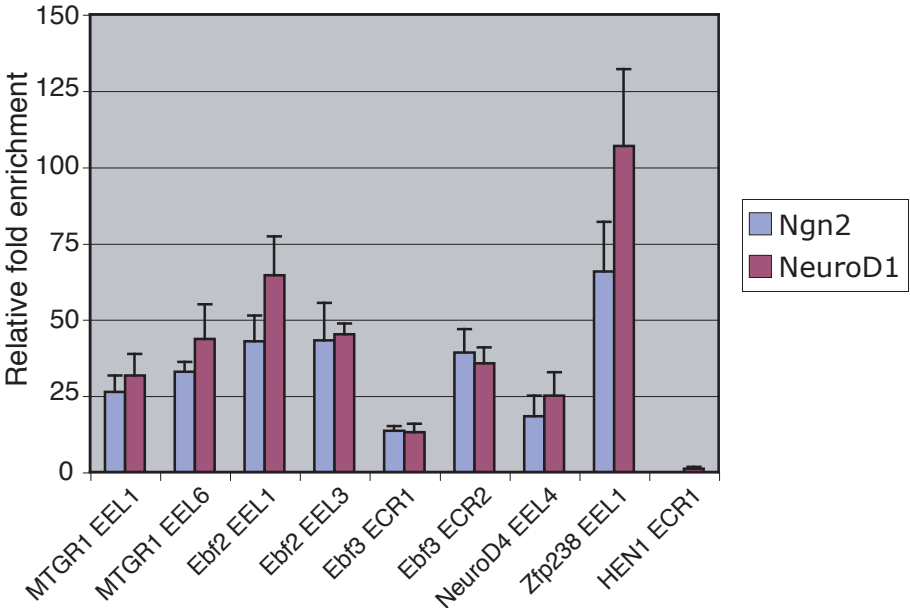

Seo\_Supplemental Figure\_S9. Computational genome-wide prediction of Ngn/NeuroD target genes

A. Ngn/NeuroD target genes predicted by PAP (347 genes)

| Intersection      |          |                                                                                        | p-value |       |
|-------------------|----------|----------------------------------------------------------------------------------------|---------|-------|
| Ngn/NeuroD matrix |          |                                                                                        | h/m     | h/m/r |
| Gene ID           | Symbol   | Gene Name                                                                              |         |       |
| 90                | ACVR1    | ACTIVIN A RECEPTOR, TYPE I                                                             | 0       | 0     |
| 238               | ALK      | ANAPLASTIC LYMPHOMA KINASE (KI-1)                                                      | 0       | 0     |
| 23245             | ASTN2    | ASTROTACTIN 2                                                                          | 0       | 0     |
| 463               | ATBF1    | AT-BINDING TRANSCRIPTION FACTOR 1                                                      | 0       | 0     |
| 84913             | ATOH8    | ATONAL HOMOLOG 8 (DROSOPHILA)                                                          | 0       | 0     |
| 54828             | BCAS3    | BREAST CARCINOMA AMPLIFIED SEQUENCE 3                                                  | 0       | 0     |
| 64919             | BCL11B   | B-CELL CLL/LYMPHOMA 11B (ZINC FINGER PROTEIN)                                          | 0       | 0     |
| 54796             | BNC2     | BASONUCLIN 2                                                                           | 0       | 0     |
| 8945              | BTRC     | BETA-TRANSDUCIN REPEAT CONTAINING                                                      | 0       | 0     |
| 27291             | C10orf28 | CHROMOSOME 10 OPEN READING FRAME 28                                                    | 0       | 0     |
| 55799             | CACNA2D3 | CALCIUM CHANNEL, VOLTAGE-DEPENDENT, ALPHA 2/DELTA 3 SUBUNIT                            | 0       | 0     |
| 9139              | CBFA2T2  | CORE-BINDING FACTOR, RUNT DOMAIN, ALPHA SUBUNIT 2; TRANSLOCATED TO, 2                  | 0       | 0     |
| 863               | CBFA2T3  | CORE-BINDING FACTOR, RUNT DOMAIN, ALPHA SUBUNIT 2; TRANSLOCATED TO, 3                  | 0       | 0     |
| 55118             | CRTAC1   | CARTILAGE ACIDIC PROTEIN 1                                                             | 0       | 0     |
| 51523             | CXXC5    | CXXC FINGER 5                                                                          | 0       | 0     |
| 1600              | DAB1     | DISABLED HOMOLOG 1 (DROSOPHILA)                                                        | 0       | 0     |
| 1641              | DCX      | DOUBLECORTEX; LISSENCEPHALY, X-LINKED (DOUBLECORTIN)                                   | 0       | 0     |
| 1740              | DLG2     | DISCS, LARGE HOMOLOG 2, CHAPSYN-110 (DROSOPHILA)                                       | 0       | 0     |
| 54567             | DLL4     | DELTA-LIKE 4 (DROSOPHILA)                                                              | 0       | 0     |
| 1780              | DYNC111  | DYNEIN, CYTOPLASMIC 1, INTERMEDIATE CHAIN 1                                            | 0       | 0     |
| 2035              | EPB41    | ERYTHROCYTE MEMBRANE PROTEIN BAND 4.1 (ELLIPTOCYTOSIS 1, RH-LINKED)                    | 0       | 0     |
| 2048              | EPHB2    | EPH RECEPTOR B2                                                                        | 0       | 0     |
| 2104              | ESRRG    | ESTROGEN-RELATED RECEPTOR GAMMA                                                        | 0       | 0     |
| 8326              | FZD9     | FRIZZLED HOMOLOG 9 (DROSOPHILA)                                                        | 0       | 0     |
| 2719              | GPC3     | GLYPICAN 3                                                                             | 0       | 0     |
| 2904              | GRIN2B   | GLUTAMATE RECEPTOR, IONOTROPIC, N-METHYL D-ASPARTATE 2B                                | 0       | 0     |
| 3459              | IFNGR1   | INTERFERON GAMMA RECEPTOR 1                                                            | 0       | 0     |
| 26280             | IL1RAPL2 | INTERLEUKIN 1 RECEPTOR ACCESSORY PROTEIN-LIKE 2                                        | 0       | 0     |
| 3752              | KCND3    | POTASSIUM VOLTAGE-GATED CHANNEL, SHAL-RELATED SUBFAMILY, MEMBER 3                      | 0       | 0     |
| 3784              | KCNQ1    | POTASSIUM VOLTAGE-GATED CHANNEL, KQT-LIKE SUBFAMILY, MEMBER 1                          | 0       | 0     |
| 57710             | KIAA1614 | KIAA1614                                                                               | 0       | 0     |
| 79817             | MOBK12B  | MOB1, MPS ONE BINDER KINASE ACTIVATOR-LIKE 2B (YEAST)                                  | 0       | 0     |
| 4684              | NCAM1    | NEURAL CELL ADHESION MOLECULE 1                                                        | 0       | 0     |
| 4784              | NFIX     | NUCLEAR FACTOR I/X (CCAAT-BINDING TRANSCRIPTION FACTOR)                                | 0       | 0     |
| 4808              | NHLH2    | NESCIENT HELIX LOOP HELIX 2                                                            | 0       | 0     |
| 64067             | NPAS3    | NEURONAL PAS DOMAIN PROTEIN 3                                                          | 0       | 0     |
| 8828              | NRP2     | NEUROFILIN 2                                                                           | 0       | 0     |
| 9378              | NRXN1    | NEUREXIN 1                                                                             | 0       | 0     |
| 57451             | ODZ2     | ODZ, ODD OZ/TEN-M HOMOLOG 2 (DROSOPHILA)                                               | 0       | 0     |
| 26011             | ODZ4     | ODZ, ODD OZ/TEN-M HOMOLOG 4 (DROSOPHILA)                                               | 0       | 0     |
| 5087              | PBX1     | PRE-B-CELL LEUKEMIA TRANSCRIPTION FACTOR 1                                             | 0       | 0     |
| 29951             | PDZRN4   | PDZ DOMAIN CONTAINING RING FINGER 4                                                    | 0       | 0     |
| 389158            | PLSCR5   | PHOSPHOLIPID SCRAMBLASE FAMILY, MEMBER 5                                               | 0       | 0     |
| 5362              | PLXNA2   | PLEXIN A2                                                                              | 0       | 0     |
| 5521              | PPP2R2B  | PROTEIN PHOSPHATASE 2 (FORMERLY 2A), REGULATORY SUBUNIT B (PR 52), BETA ISOFORM        | 0       | 0     |
| 5579              | PRKCB1   | PROTEIN KINASE C, BETA 1                                                               | 0       | 0     |
| 5629              | PROX1    | PROSPERO-RELATED HOMEODOMAIN 1                                                         | 0       | 0     |
| 5690              | PSMB2    | PROTEASOME (PROSOME, MACROPAIN) SUBUNIT, BETA TYPE, 2                                  | 0       | 0     |
| 11122             | PTPRT    | PROTEIN TYROSINE PHOSPHATASE, RECEPTOR TYPE, T                                         | 0       | 0     |
| 64901             | RANBP17  | RAN BINDING PROTEIN 17                                                                 | 0       | 0     |
| 5914              | RARA     | RETINOIC ACID RECEPTOR, ALPHA                                                          | 0       | 0     |
| 9904              | RBM19    | RNA BINDING MOTIF PROTEIN 19                                                           | 0       | 0     |
| 6091              | ROBO1    | ROUNDABOUT, AXON GUIDANCE RECEPTOR, HOMOLOG 1 (DROSOPHILA)                             | 0       | 0     |
| 6095              | RORA     | RAR-RELATED ORPHAN RECEPTOR A                                                          | 0       | 0     |
| 862               | RUNX1T1  | RUNT-RELATED TRANSCRIPTION FACTOR 1; TRANSLOCATED TO, 1 (CYCLIN D-RELATED)             | 0       | 0     |
| 23328             | SASH1    | SAM AND SH3 DOMAIN CONTAINING 1                                                        | 0       | 0     |
| 8631              | SCAP1    | SRC FAMILY ASSOCIATED PHOSPHOPROTEIN 1                                                 | 0       | 0     |
| 10806             | SDCCAG8  | SEROLOGICALLY DEFINED COLON CANCER ANTIGEN 8                                           | 0       | 0     |
| 10371             | SEMA3A   | SEMA DOMAIN, IMMUNOGLOBULIN DOMAIN (IG), SHORT BASIC DOMAIN, SECRETED, (SEMAPHORIN) 3A | 0       | 0     |
| 89874             | SLC25A21 | OXODICARBOXYLATE CARRIER                                                               | 0       | 0     |
| 6586              | SLIT3    | SLIT HOMOLOG 3 (DROSOPHILA)                                                            | 0       | 0     |
| 23648             | SSBP3    | SINGLE STRANDED DNA BINDING PROTEIN 3                                                  | 0       | 0     |
| 9705              | ST18     | SUPPRESSION OF TUMORIGENICITY 18 (BREAST CARCINOMA) (ZINC FINGER PROTEIN)              | 0       | 0     |
| 8224              | SYN3     | SYNAPSIN III                                                                           | 0       | 0     |
| 6925              | TCF4     | TRANSCRIPTION FACTOR 4                                                                 | 0       | 0     |
| 10867             | TSPAN9   | TETRASPANIN 9                                                                          | 0       | 0     |
| 26137             | ZBTB20   | ZINC FINGER AND BTB DOMAIN CONTAINING 20                                               | 0       | 0     |
| 9839              | ZFH1B    | ZINC FINGER HOMEODOMAIN 1B                                                             | 0       | 0     |
| 23090             | ZNF423   | ZINC FINGER PROTEIN 423                                                                | 0       | 0     |
| 57616             | ZNF537   | ZINC FINGER PROTEIN 537                                                                | 0       | 0     |
| 27044             |          | STAPHYLOCOCCAL NUCLEASE DOMAIN CONTAINING 1                                            | 0       | 0     |
| 50863             |          | NEUROTRIMIN                                                                            | 0       | 0     |
| 121256            |          | TRANSMEMBRANE PROTEIN 132D                                                             | 0       | 0     |

|        |          |                                                                                   |        |        |
|--------|----------|-----------------------------------------------------------------------------------|--------|--------|
| 55084  |          | HYPOTHETICAL PROTEIN FLJ10159                                                     | 0      | 0      |
| 54715  |          | ATAXIN 2-BINDING PROTEIN 1                                                        | 0      | 0      |
| 51474  |          | LIM DOMAIN AND ACTIN BINDING 1                                                    | 0      | 0      |
| 54622  | ARL15    | ADP-RIBOSYLATION FACTOR-LIKE 15                                                   | 0.0001 | 0      |
| 460    | ASTN     | ASTROTACTIN                                                                       | 0.0001 | 0      |
| 9254   | CACNA2D2 | CALCIUM CHANNEL, VOLTAGE-DEPENDENT, ALPHA 2/DELTA SUBUNIT 2                       | 0.0001 | 0      |
| 50515  | CHST11   | CARBOHYDRATE (CHONDROITIN 4) SULFOTRANSFERASE 11                                  | 0.0001 | 0      |
| 1630   | DCC      | DELETED IN COLORECTAL CARCINOMA                                                   | 0.0001 | 0      |
| 4916   | NTRK3    | NEUROTROPHIC TYROSINE KINASE, RECEPTOR, TYPE 3                                    | 0.0001 | 0      |
| 5076   | PAX2     | PAIRED BOX GENE 2                                                                 | 0.0001 | 0      |
| 10472  | ZNF238   | ZINC FINGER PROTEIN 238                                                           | 0.0001 | 0      |
| 441115 |          | NA                                                                                | 0.0001 | 0      |
| 29789  |          | GTP-BINDING PROTEIN PTD004                                                        | 0.0001 | 0      |
| 832    | CAPZB    | CAPPING PROTEIN (ACTIN FILAMENT) MUSCLE Z-LINE, BETA                              | 0.0002 | 0      |
| 54927  | CHCHD3   | COILED-COIL-HELIX-COILED-COIL-HELIX DOMAIN CONTAINING 3                           | 0.0002 | 0      |
| 9442   | CRSP8    | COFACTOR REQUIRED FOR SP1 TRANSCRIPTIONAL ACTIVATION, SUBUNIT 8, 34KDA            | 0.0002 | 0      |
| 85407  | NKD1     | NAKED CUTICLE HOMOLOG 1 (DROSOPHILA)                                              | 0.0002 | 0      |
| 8829   | NRP1     | NEUROFILIN 1                                                                      | 0.0002 | 0      |
| 9353   | SLIT2    | SLIT HOMOLOG 2 (DROSOPHILA)                                                       | 0.0002 | 0      |
| 7903   | ST8SIA4  | ST8 ALPHA-N-ACETYL-NEURAMINIDE ALPHA-2,8-SIALYLTRANSFERASE 4                      | 0.0002 | 0      |
| 90390  | THRAP6   | THYROID HORMONE RECEPTOR ASSOCIATED PROTEIN 6                                     | 0.0002 | 0      |
| 60528  | ELAC2    | HYPOTHETICAL PROTEIN FLJ10530                                                     | 0.0004 | 0      |
| 2042   | EPHA3    | EPH RECEPTOR A3                                                                   | 0.0004 | 0      |
| 2047   | EPHB1    | EPH RECEPTOR B1                                                                   | 0.0004 | 0      |
| 2066   | ERBB4    | V-ERB-A ERYTHROBLASTIC LEUKEMIA VIRAL ONCOGENE HOMOLOG 4 (AVIAN)                  | 0.0005 | 0      |
| 54901  | CDKAL1   | CDK5 REGULATORY SUBUNIT ASSOCIATED PROTEIN 1-LIKE 1                               | 0.0007 | 0      |
| 9935   | MAFB     | V-MAF MUSCULOAPONEUROTIC FIBROSARCOMA ONCOGENE HOMOLOG B (AVIAN)                  | 0.0008 | 0      |
| 4692   | NDN      | NECDIN HOMOLOG (MOUSE)                                                            | 0.0011 | 0      |
| 168667 | BMPER    | BMP BINDING ENDOTHELIAL REGULATOR                                                 | 0.0012 | 0      |
| 64411  | CENTD3   | CENTAURIN, DELTA 3                                                                | 0.0013 | 0      |
| 1523   | CUTL1    | CUT-LIKE 1, CCAAT DISPLACEMENT PROTEIN (DROSOPHILA)                               | 0.0014 | 0      |
| 59269  | HIVEP3   | HUMAN IMMUNODEFICIENCY VIRUS TYPE I ENHANCER BINDING PROTEIN 3                    | 0.0024 | 0      |
| 9420   | CYP7B1   | CYTOCHROME P450, FAMILY 7, SUBFAMILY B, POLYPEPTIDE 1                             | 0      | 0.0001 |
| 55137  | FIGN     | FIDGETIN                                                                          | 0      | 0.0001 |
| 3479   | IGF1     | INSULIN-LIKE GROWTH FACTOR 1 (SOMATOMEDIN C)                                      | 0      | 0.0001 |
| 203447 | NRK      | NIK RELATED KINASE                                                                | 0      | 0.0001 |
| 10891  | PPARGC1A | PEROXISOME PROLIFERATIVE ACTIVATED RECEPTOR, GAMMA, COACTIVATOR 1, ALPHA          | 0      | 0.0001 |
| 26508  | HEYL     | HAIRY/ENHANCER-OF-SPLIT RELATED WITH YRPW MOTIF-LIKE                              | 0.0001 | 0.0001 |
| 4045   | LSAMP    | LIMBIC SYSTEM-ASSOCIATED MEMBRANE PROTEIN                                         | 0.0001 | 0.0001 |
| 4654   | MYOD1    | MYOGENIC DIFFERENTIATION 1                                                        | 0.0001 | 0.0001 |
| 9423   | NTN1     | NETRIN 1                                                                          | 0.0001 | 0.0001 |
| 55697  | VAC14    | TAX1 (HUMAN T-CELL LEUKEMIA VIRUS TYPE I) BINDING PROTEIN 2                       | 0.0001 | 0.0001 |
| 23414  | ZFPM2    | ZINC FINGER PROTEIN, MULTITYPE 2                                                  | 0.0001 | 0.0001 |
| 79191  | IRX3     | IROQUOIS HOMEODOMAIN PROTEIN 3                                                    | 0.0002 | 0.0001 |
| 132204 | SYNPR    | SYNAPOPORIN                                                                       | 0.0002 | 0.0001 |
| 5566   | PRKACA   | PROTEIN KINASE, CAMP-DEPENDENT, CATALYTIC, ALPHA                                  | 0.0003 | 0.0001 |
| 171425 | CLYBL    | CITRATE LYASE BETA LIKE                                                           | 0.0004 | 0.0001 |
| 10194  | SDCCAG33 | SEROLOGICALLY DEFINED COLON CANCER ANTIGEN 33                                     | 0.0006 | 0.0001 |
| 1804   | DPP6     | DIPEPTIDYL-PEPTIDASE 6                                                            | 0.0008 | 0.0001 |
| 28992  |          | LRP16 PROTEIN                                                                     | 0.001  | 0.0001 |
| 8038   | ADAM12   | ADAM METALLOPEPTIDASE DOMAIN 12 (MELTRIN ALPHA)                                   | 0.0017 | 0.0001 |
| 1910   | EDNRB    | ENDOTHELIN RECEPTOR TYPE B                                                        | 0.0028 | 0.0001 |
| 89796  | NAV1     | HYPOTHETICAL PROTEIN MGC14961                                                     | 0      | 0.0002 |
| 56245  | C21orf62 | CHROMOSOME 21 OPEN READING FRAME 62                                               | 0.0001 | 0.0002 |
| 84303  | CHCHD6   | COILED-COIL-HELIX-COILED-COIL-HELIX DOMAIN CONTAINING 6                           | 0.0001 | 0.0002 |
| 84662  | GLIS2    | GLIS FAMILY ZINC FINGER 2                                                         | 0.0001 | 0.0002 |
| 116449 |          | MAST CELL IMMUNORECEPTOR SIGNAL TRANSDUCER                                        | 0.0001 | 0.0002 |
| 3779   | KCNMB1   | POTASSIUM LARGE CONDUCTANCE CALCIUM-ACTIVATED CHANNEL, SUBFAMILY M, BETA MEMBER 1 | 0.0002 | 0.0002 |
| 64374  | SIL1     | SIL1 HOMOLOG, ENDOPLASMIC RETICULUM CHAPERONE (S. CEREVISIAE)                     | 0.0002 | 0.0002 |
| 80031  | SEMA6D   | KIAA1479 PROTEIN                                                                  | 0.0003 | 0.0002 |
| 80731  |          | KIAA1679 PROTEIN                                                                  | 0.0005 | 0.0002 |
| 8618   | CADPS    | CA2+-DEPENDENT SECRETION ACTIVATOR                                                | 0.0008 | 0.0002 |
| 9627   | SNCAIP   | SYNUCLEIN, ALPHA INTERACTING PROTEIN (SYNPILIN)                                   | 0.0008 | 0.0002 |
| 4010   | LMX1B    | LIM HOMEODOMAIN TRANSCRIPTION FACTOR 1, BETA                                      | 0.0009 | 0.0002 |
| 3757   | KCNH2    | POTASSIUM VOLTAGE-GATED CHANNEL, SUBFAMILY H (EAG-RELATED), MEMBER 2              | 0.001  | 0.0002 |
| 214    | ALCAM    | ACTIVATED LEUKOCYTE CELL ADHESION MOLECULE                                        | 0.0012 | 0.0002 |
| 4853   | NOTCH2   | NOTCH HOMOLOG 2 (DROSOPHILA)                                                      | 0.0014 | 0.0002 |
| 7150   | TOP1     | TOPOISOMERASE (DNA) I                                                             | 0.0014 | 0.0002 |
| 1307   | COL16A1  | COLLAGEN, TYPE XVI, ALPHA 1                                                       | 0.0016 | 0.0002 |
| 6468   | FBXW4    | F-BOX AND WD-40 DOMAIN PROTEIN 4                                                  | 0.0016 | 0.0002 |
| 4851   | NOTCH1   | NOTCH HOMOLOG 1, TRANSLLOCATION-ASSOCIATED (DROSOPHILA)                           | 0.002  | 0.0002 |
| 223075 |          | HYPOTHETICAL PROTEIN LOC223075                                                    | 0.002  | 0.0002 |
| 64131  | XYLT1    | XYLOSYLTRANSFERASE I                                                              | 0.0031 | 0.0002 |
| 4212   | MEIS2    | MEIS1, MYELOID ECOTROPIC VIRAL INTEGRATION SITE 1 HOMOLOG 2 (MOUSE)               | 0.0054 | 0.0002 |
| 90134  | KCNH7    | POTASSIUM VOLTAGE-GATED CHANNEL, SUBFAMILY H (EAG-RELATED), MEMBER 7              | 0      | 0.0003 |
| 151531 | UPP2     | URIDINE PHOSPHORYLASE 2                                                           | 0      | 0.0003 |
| 1013   | CDH15    | CADHERIN 15, M-CADHERIN (MYOTUBULE)                                               | 0.0001 | 0.0003 |
| 143458 | LDLRAD3  | LOW DENSITY LIPOPROTEIN RECEPTOR CLASS A DOMAIN CONTAINING 3                      | 0.0001 | 0.0003 |
| 26018  | LRIG1    | LEUCINE-RICH REPEATS AND IMMUNOGLOBULIN-LIKE DOMAINS 1                            | 0.0001 | 0.0003 |
| 10451  | VAV3     | VAV 3 ONCOGENE                                                                    | 0.0002 | 0.0003 |
| 83989  | C5orf21  | CHROMOSOME 5 OPEN READING FRAME 21                                                | 0.0006 | 0.0003 |

|        |          |                                                                                                   |        |        |
|--------|----------|---------------------------------------------------------------------------------------------------|--------|--------|
| 23769  | FLRT1    | FIBRONECTIN LEUCINE RICH TRANSMEMBRANE PROTEIN 1                                                  | 0.0008 | 0.0003 |
| 5954   | RCN1     | RETICULOCALBIN 1, EF-HAND CALCIUM BINDING DOMAIN                                                  | 0.0008 | 0.0003 |
| 4919   | ROR1     | RECEPTOR TYROSINE KINASE-LIKE ORPHAN RECEPTOR 1                                                   | 0.0013 | 0.0003 |
| 2674   | GFRA1    | GNDF FAMILY RECEPTOR ALPHA 1                                                                      | 0.0016 | 0.0003 |
| 339855 | KY       | KYPHOSCOLIOSIS PEPTIDASE                                                                          | 0.0017 | 0.0003 |
| 64328  | XPO4     | EXPORTIN 4                                                                                        | 0.0019 | 0.0003 |
| 4880   | NPPC     | NATRIURETIC PEPTIDE PRECURSOR C                                                                   | 0.003  | 0.0003 |
| 4651   | MYO10    | MYOSIN X                                                                                          | 0.0045 | 0.0003 |
| 118    | ADD1     | ADDUCIN 1 (ALPHA)                                                                                 | 0      | 0.0004 |
| 4131   | MAP1B    | MICROTUBULE-ASSOCIATED PROTEIN 1B                                                                 | 0      | 0.0004 |
| 146760 | RTN4RL1  | RETICULON 4 RECEPTOR-LIKE 1                                                                       | 0      | 0.0004 |
| 3397   | ID1      | INHIBITOR OF DNA BINDING 1, DOMINANT NEGATIVE HELIX-LOOP-HELIX PROTEIN                            | 0.0001 | 0.0004 |
| 132    | ADK      | ADENOSINE KINASE                                                                                  | 0.0003 | 0.0004 |
| 255275 |          | SIMILAR TO MYELOID-ASSOCIATED DIFFERENTIATION MARKER                                              | 0.0003 | 0.0004 |
| 10783  | NEK6     | NIMA (NEVER IN MITOSIS GENE A)-RELATED KINASE 6                                                   | 0.0004 | 0.0004 |
| 91522  | COL23A1  | COLLAGEN, TYPE XXIII, ALPHA 1                                                                     | 0.001  | 0.0004 |
| 7067   | THRA     | THYROID HORMONE RECEPTOR, ALPHA (ERYTHROBLASTIC LEUKEMIA VIRAL (V-ERB-A) ONCOGENE HOMOLOG, AVIAN) | 0.0016 | 0.0004 |
| 51646  | YPEL5    | YIPPEE-LIKE 5 (DROSOPHILA)                                                                        | 0.0018 | 0.0004 |
| 9844   | ELMO1    | ENGULFMENT AND CELL MOTILITY 1                                                                    | 0.002  | 0.0004 |
| 93664  | CADPS2   | HYPOTHETICAL PROTEIN FLJ20761                                                                     | 0.0029 | 0.0004 |
| 4761   | NEUROD2  | NEUROGENIC DIFFERENTIATION 2                                                                      | 0.0001 | 0.0005 |
| 30820  | KCNIP1   | KV CHANNEL INTERACTING PROTEIN 1                                                                  | 0.0004 | 0.0005 |
| 5793   | PTPRG    | PROTEIN TYROSINE PHOSPHATASE, RECEPTOR TYPE, G                                                    | 0.0005 | 0.0005 |
| 79960  | PHF17    | PHD FINGER PROTEIN 17                                                                             | 0.0006 | 0.0005 |
| 1785   | DNM2     | DYNAMIN 2                                                                                         | 0.0013 | 0.0005 |
| 10435  | CDC42EP2 | CDC42 EFFECTOR PROTEIN (RHO GTPASE BINDING) 2                                                     | 0.0017 | 0.0005 |
| 64788  |          | HYPOTHETICAL PROTEIN FLJ12681                                                                     | 0.0021 | 0.0005 |
| 4978   | OPCML    | OPIOID BINDING PROTEIN/CELL ADHESION MOLECULE-LIKE                                                | 0.0023 | 0.0005 |
| 1996   | ELAVL4   | ELAV (EMBRYONIC LETHAL, ABNORMAL VISION, DROSOPHILA)-LIKE 4 (HU ANTIGEN D)                        | 0.0001 | 0.0006 |
| 2892   | GRIA3    | GLUTAMATE RECEPTOR, IONOTROPIC, AMPA 3                                                            | 0.0014 | 0.0006 |
| 6641   | SNTB1    | SYNTROPHIN, BETA 1 (DYSTROPHIN-ASSOCIATED PROTEIN A1, 59KDA, BASIC COMPONENT 1)                   | 0.0015 | 0.0006 |
| 116987 | CENTG2   | CENTAURIN, GAMMA 2                                                                                | 0.0024 | 0.0006 |
| 9242   | MSC      | MUSCULIN (ACTIVATED B-CELL FACTOR-1)                                                              | 0.0028 | 0.0006 |
| 4807   | NHLH1    | NESCIENT HELIX LOOP HELIX 1                                                                       | 0.0029 | 0.0006 |
| 182    | JAG1     | JAGGED 1 (ALAGILLE SYNDROME)                                                                      | 0.0036 | 0.0006 |
| 6870   | TACR3    | TACHYKININ RECEPTOR 3                                                                             | 0.0054 | 0.0006 |
| 9782   | MATR3    | MATRIN 3                                                                                          | 0.0076 | 0.0006 |
| 10000  | AKT3     | V-AKT MURINE THYMOMA VIRAL ONCOGENE HOMOLOG 3 (PROTEIN KINASE B, GAMMA)                           | 0.0001 | 0.0007 |
| 26235  | FBXL4    | F-BOX AND LEUCINE-RICH REPEAT PROTEIN 4                                                           | 0.0001 | 0.0007 |
| 84529  | C15orf41 | CHROMOSOME 15 OPEN READING FRAME 41                                                               | 0.0011 | 0.0007 |
| 445    | ASS      | ARGININOSUCCINATE SYNTHETASE                                                                      | 0.0013 | 0.0007 |
| 388336 |          | FLJ45455 PROTEIN                                                                                  | 0.0031 | 0.0007 |
| 8633   | UNC5C    | UNC-5 HOMOLOG C (C. ELEGANS)                                                                      | 0.0032 | 0.0007 |
| 9482   | STX8     | SYNTAXIN 8                                                                                        | 0.005  | 0.0007 |
| 57419  | SLC24A3  | SOLUTE CARRIER FAMILY 24 (SODIUM/POTASSIUM/CALCIUM EXCHANGER), MEMBER 3                           | 0.0002 | 0.0008 |
| 2649   | NR6A1    | NUCLEAR RECEPTOR SUBFAMILY 6, GROUP A, MEMBER 1                                                   | 0.0004 | 0.0008 |
| 148979 | GLIS1    | GLIS FAMILY ZINC FINGER 1                                                                         | 0.0005 | 0.0008 |
| 55504  | TNFRSF19 | TUMOR NECROSIS FACTOR RECEPTOR SUPERFAMILY, MEMBER 19                                             | 0.0005 | 0.0008 |
| 1496   | CTNNA2   | CATENIN (CADHERIN-ASSOCIATED PROTEIN), ALPHA 2                                                    | 0.0008 | 0.0008 |
| 4255   | MGMT     | O-6-METHYLGUANINE-DNA METHYLTRANSFERASE                                                           | 0.0016 | 0.0008 |
| 7482   | WNT2B    | WINGLESS-TYPE MMTV INTEGRATION SITE FAMILY, MEMBER 2B                                             | 0.002  | 0.0008 |
| 348980 | HCN1     | HYPERPOLARIZATION ACTIVATED CYCLIC NUCLEOTIDE-GATED POTASSIUM CHANNEL 1                           | 0.0021 | 0.0008 |
| 9543   | PUNC     | PUTATIVE NEURONAL CELL ADHESION MOLECULE                                                          | 0.0023 | 0.0008 |
| 10620  | ARID3B   | AT RICH INTERACTIVE DOMAIN 3B (BRIGHT- LIKE)                                                      | 0.0059 | 0.0008 |
| 10973  | ASCC3    | ACTIVATING SIGNAL COINTEGRATOR 1 COMPLEX SUBUNIT 3                                                | 0.0002 | 0.0009 |
| 10404  |          | PLASMA GLUTAMATE CARBOXYPEPTIDASE                                                                 | 0.0012 | 0.0009 |
| 57529  | RGAG1    | RETROTRANSPOSON GAG DOMAIN CONTAINING 1                                                           | 0.0015 | 0.0009 |
| 90161  | HS6ST2   | HEPARAN SULFATE 6-O-SULFOTRANSFERASE 2                                                            | 0.0017 | 0.0009 |
| 3399   | ID3      | INHIBITOR OF DNA BINDING 3, DOMINANT NEGATIVE HELIX-LOOP-HELIX PROTEIN                            | 0.0033 | 0.0009 |
| 3605   | IL17     | INTERLEUKIN 17 (CYTOTOXIC T-LYMPHOCYTE-ASSOCIATED SERINE ESTERASE 8)                              | 0.0035 | 0.0009 |
| 28514  | DLL1     | DELTA-LIKE 1 (DROSOPHILA)                                                                         | 0.0048 | 0.0009 |
| 9779   | TBC1D5   | TBC1 DOMAIN FAMILY, MEMBER 5                                                                      | 0      | 0.001  |
| 57178  | RAI17    | RETINOIC ACID INDUCED 17                                                                          | 0.0002 | 0.001  |
| 160335 | TMTC2    | TRANSMEMBRANE AND TETRATRICOPEPTIDE REPEAT CONTAINING 2                                           | 0.0092 | 0.001  |
| 2900   | GRIK4    | GLUTAMATE RECEPTOR, IONOTROPIC, KAINATE 4                                                         | 0      | 0.0011 |
| 23335  | WDR7     | WD REPEAT DOMAIN 7                                                                                | 0.0005 | 0.0011 |
| 9450   | LY86     | LYMPHOCYTE ANTIGEN 86                                                                             | 0.001  | 0.0011 |
| 23037  | PDZD2    | PDZ DOMAIN CONTAINING 2                                                                           | 0.0052 | 0.0011 |
| 4088   | SMAD3    | SMAD, MOTHERS AGAINST DPP HOMOLOG 3 (DROSOPHILA)                                                  | 0.0002 | 0.0012 |
| 139263 |          | NA                                                                                                | 0.0018 | 0.0012 |
| 1879   | EBF      | EARLY B-CELL FACTOR                                                                               | 0.0022 | 0.0012 |
| 60412  | EXOC4    | EXOCYST COMPLEX COMPONENT 4                                                                       | 0.0045 | 0.0012 |
| 1896   | EDA      | ECTODYSPLASIN A                                                                                   | 0.0005 | 0.0013 |
| 131377 | KBTBD5   | KELCH REPEAT AND BTB (POZ) DOMAIN CONTAINING 5                                                    | 0.0012 | 0.0013 |
| 55161  | TMEM33   | TRANSMEMBRANE PROTEIN 33                                                                          | 0.0025 | 0.0013 |
| 79877  | DCAKD    | DEPHOSPHO-COA KINASE DOMAIN CONTAINING                                                            | 0.0038 | 0.0013 |
| 4781   | NFIB     | NUCLEAR FACTOR I/B                                                                                | 0      | 0.0014 |
| 57144  | PAK7     | P21(CDKN1A)-ACTIVATED KINASE 7                                                                    | 0.0004 | 0.0014 |
| 80326  | WNT10A   | WINGLESS-TYPE MMTV INTEGRATION SITE FAMILY, MEMBER 10A                                            | 0.0014 | 0.0014 |
| 80301  | PLEKHQ1  | PLECKSTRIN HOMOLOGY DOMAIN CONTAINING, FAMILY Q MEMBER 1                                          | 0.0022 | 0.0014 |
| 153443 | SRFBP1   | SERUM RESPONSE FACTOR BINDING PROTEIN 1                                                           | 0.0052 | 0.0014 |

|        |          |                                                                                                   |        |        |
|--------|----------|---------------------------------------------------------------------------------------------------|--------|--------|
| 200734 | SPRED2   | SPROUTY-RELATED, EVH1 DOMAIN CONTAINING 2                                                         | 0.0074 | 0.0014 |
| 5727   | PTCH     | PATCHED HOMOLOG (DROSOPHILA)                                                                      | 0.0096 | 0.0014 |
| 5453   | POU3F1   | POU DOMAIN, CLASS 3, TRANSCRIPTION FACTOR 1                                                       | 0      | 0.0015 |
| 9555   | H2AFY    | H2A HISTONE FAMILY, MEMBER Y                                                                      | 0.0016 | 0.0015 |
| 286514 | MAGEB18  | MELANOMA ANTIGEN FAMILY B, 18                                                                     | 0.0045 | 0.0016 |
| 1588   | CYP19A1  | CYTOCHROME P450, FAMILY 19, SUBFAMILY A, POLYPEPTIDE 1                                            | 0.0087 | 0.0016 |
| 1131   | CHRM3    | CHOLINERGIC RECEPTOR, MUSCARINIC 3                                                                | 0.002  | 0.0017 |
| 64211  | LHX5     | LIM HOMEOBOX 5                                                                                    | 0.0026 | 0.0017 |
| 5142   | PDE4B    | PHOSPHODIESTERASE 4B, CAMP-SPECIFIC (PHOSPHODIESTERASE E4 DUNCE HOMOLOG, DROSOPHILA)              | 0.0026 | 0.0017 |
| 9110   | MTMR4    | MYOTUBULARIN RELATED PROTEIN 4                                                                    | 0.0044 | 0.0017 |
| 7483   | WNT9A    | WINGLESS-TYPE MMTV INTEGRATION SITE FAMILY, MEMBER 9A                                             | 0.0048 | 0.0017 |
| 3617   | IMPG1    | INTERPHOTORECEPTOR MATRIX PROTEOGLYCAN 1                                                          | 0.0089 | 0.0017 |
| 5139   | PDE3A    | PHOSPHODIESTERASE 3A, CGMP-INHIBITED                                                              | 0.0071 | 0.0018 |
| 93986  | FOXP2    | TRINUCLEOTIDE REPEAT CONTAINING 10                                                                | 0.0093 | 0.0018 |
| 3164   | NR4A1    | NUCLEAR RECEPTOR SUBFAMILY 4, GROUP A, MEMBER 1                                                   | 0.0088 | 0.0019 |
| 11248  | NXPH3    | NEUREXOPHILIN 3                                                                                   | 0.0045 | 0.002  |
| 161357 | MAMDC1   | MAM DOMAIN CONTAINING 1                                                                           | 0.0089 | 0.002  |
| 5596   | MAPK4    | MITOGEN-ACTIVATED PROTEIN KINASE 4                                                                | 0.0009 | 0.0021 |
| 23157  | SEPT6    | SEPTIN 6                                                                                          | 0.003  | 0.0021 |
| 117154 | DACH2    | DACHSHUND HOMOLOG 2 (DROSOPHILA)                                                                  | 0.0041 | 0.0021 |
| 70     | ACTC     | ACTIN, ALPHA, CARDIAC MUSCLE                                                                      | 0.008  | 0.0021 |
| 92369  | SPSB4    | SPLA/RYANODINE RECEPTOR DOMAIN AND SOCS BOX CONTAINING 4                                          | 0.0096 | 0.0021 |
| 4209   | MEF2D    | MADS BOX TRANSCRIPTION ENHANCER FACTOR 2, POLYPEPTIDE D (MYOCYTE ENHANCER FACTOR 2D)              | 0.0018 | 0.0022 |
| 340784 | HMX3     | HOMEOBOX (H6 FAMILY) 3                                                                            | 0.0036 | 0.0023 |
| 54843  | SYTL2    | SYNAPTOTAGMIN-LIKE 2                                                                              | 0.0037 | 0.0023 |
| 54541  | DDIT4    | DNA-DAMAGE-INDUCIBLE TRANSCRIPT 4                                                                 | 0.0071 | 0.0023 |
| 23439  | ATP1B4   | ATPASE, (NA+)/K+ TRANSPORTING, BETA 4 POLYPEPTIDE                                                 | 0.0074 | 0.0023 |
| 27324  | TNRC9    | TRINUCLEOTIDE REPEAT CONTAINING 9                                                                 | 0.0001 | 0.0024 |
| 63951  | DMRTA1   | DMRT-LIKE FAMILY A1                                                                               | 0.0026 | 0.0024 |
| 30010  | NXPH1    | NEUREXOPHILIN 1                                                                                   | 0.0029 | 0.0024 |
| 3382   | ICA1     | ISLET CELL AUTOANTIGEN 1, 69KDA                                                                   | 0.0043 | 0.0024 |
| 3788   | KCNS2    | POTASSIUM VOLTAGE-GATED CHANNEL, DELAYED-RECTIFIER, SUBFAMILY S, MEMBER 2                         | 0      | 0.0025 |
| 1620   | DBC1     | DELETED IN BLADDER CANCER 1                                                                       | 0.0026 | 0.0026 |
| 818    | CAMK2G   | CALCIUM/CALMODULIN-DEPENDENT PROTEIN KINASE (CAM KINASE) II GAMMA                                 | 0.0032 | 0.0026 |
| 25834  | MGAT4C   | MANNOSYL (ALPHA-1,3-)-GLYCOPROTEIN BETA-1,4-N-ACETYLGLUCOSAMINYLTRANSFERASE, ISOZYME C (PUTATIVE) | 0.0006 | 0.0028 |
| 9577   | BRE      | BRAIN AND REPRODUCTIVE ORGAN-EXPRESSED (TNFRSF1A MODULATOR)                                       | 0.0076 | 0.0028 |
| 91752  | C2orf10  | CHROMOSOME 2 OPEN READING FRAME 10                                                                | 0.0081 | 0.0028 |
| 26207  | PITPNC1  | PHOSPHATIDYLINOSITOL TRANSFER PROTEIN, CYTOPLASMIC 1                                              | 0.0054 | 0.003  |
| 57591  | MKL1     | MEGAKARYOBLASTIC LEUKEMIA (TRANSLOCATION) 1                                                       | 0.001  | 0.0031 |
| 845    | CASQ2    | CALSEQUESTRIIN 2 (CARDIAC MUSCLE)                                                                 | 0.0031 | 0.0032 |
| 10266  | RAMP2    | RECEPTOR (CALCITONIN) ACTIVITY MODIFYING PROTEIN 2                                                | 0.0063 | 0.0033 |
| 91768  | CABLES1  | CDK5 AND ABL ENZYME SUBSTRATE 1                                                                   | 0.0018 | 0.0034 |
| 4897   | NRCAM    | NEURONAL CELL ADHESION MOLECULE                                                                   | 0.0049 | 0.0034 |
| 23468  | CBX5     | CHROMOBOX HOMOLOG 5 (HP1 ALPHA HOMOLOG, DROSOPHILA)                                               | 0.0058 | 0.0034 |
| 90423  | ATP6V1E2 | ATPASE, H+ TRANSPORTING, LYSOSOMAL 31KDA, V1 SUBUNIT E2                                           | 0.0078 | 0.0035 |
| 7881   | KCNAB1   | POTASSIUM VOLTAGE-GATED CHANNEL, SHAKER-RELATED SUBFAMILY, BETA MEMBER 1                          | 0.0098 | 0.0035 |
| 131368 | ZPLD1    | ZONA PELLUCIDA-LIKE DOMAIN CONTAINING 1                                                           | 0.0085 | 0.0036 |
| 7074   | TIAM1    | T-CELL LYMPHOMA INVASION AND METASTASIS 1                                                         | 0.0033 | 0.0037 |
| 4163   | MCC      | MUTATED IN COLORECTAL CANCERS                                                                     | 0.0093 | 0.0037 |
| 144165 | PRICKLE1 | PRICKLE-LIKE 1 (DROSOPHILA)                                                                       | 0.0027 | 0.0038 |
| 25925  | ZNF521   | ZINC FINGER PROTEIN 521                                                                           | 0      | 0.0039 |
| 8525   | DGKZ     | DIACYLGLYCEROL KINASE, ZETA 104KDA                                                                | 0.0071 | 0.0039 |
| 23645  | PPP1R15A | PROTEIN PHOSPHATASE 1, REGULATORY (INHIBITOR) SUBUNIT 15A                                         | 0.0084 | 0.004  |
| 10178  | ODZ1     | ODZ, ODD OZ/TEN-M HOMOLOG 1(DROSOPHILA)                                                           | 0.0003 | 0.0041 |
| 84929  | FIBCD1   | FIBRINOGEN C DOMAIN CONTAINING 1                                                                  | 0      | 0.0042 |
| 10495  | COVA1    | CYTOSOLIC OVARIAN CARCINOMA ANTIGEN 1                                                             | 0.0001 | 0.0042 |
| 90627  | STARD13  | START DOMAIN CONTAINING 13                                                                        | 0.0012 | 0.0042 |
| 318    | NUDT2    | NUDIX (NUCLEOSIDE DIPHOSPHATE LINKED MOIETY X)-TYPE MOTIF 2                                       | 0.0092 | 0.0042 |
| 105    | ADARB2   | ADENOSINE DEAMINASE, RNA-SPECIFIC, B2 (RED2 HOMOLOG RAT)                                          | 0.0041 | 0.0043 |
| 10659  | CUGBP2   | CUG TRIPLET REPEAT, RNA BINDING PROTEIN 2                                                         | 0.0022 | 0.0044 |
| 10010  | TANK     | TRAF FAMILY MEMBER-ASSOCIATED NFKB ACTIVATOR                                                      | 0.0023 | 0.0044 |
| 4593   | MUSK     | MUSCLE, SKELETAL, RECEPTOR TYROSINE KINASE                                                        | 0.0013 | 0.0045 |
| 1295   | COL8A1   | COLLAGEN, TYPE VIII, ALPHA 1                                                                      | 0.0022 | 0.0045 |
| 6195   | RPS6KA1  | RIBOSOMAL PROTEIN S6 KINASE, 90KDA, POLYPEPTIDE 1                                                 | 0.0056 | 0.0046 |
| 8840   | WISP1    | WNT1 INDUCIBLE SIGNALING PATHWAY PROTEIN 1                                                        | 0.0097 | 0.0047 |
| 56920  | SEMA3G   | SEMA DOMAIN, IMMUNOGLOBULIN DOMAIN (IG), SHORT BASIC DOMAIN, SECRETED, (SEMAPHORIN) 3G            | 0.0005 | 0.0048 |
| 2596   | GAP43    | GROWTH ASSOCIATED PROTEIN 43                                                                      | 0.0008 | 0.0048 |
| 8522   | GAS7     | GROWTH ARREST-SPECIFIC 7                                                                          | 0.0064 | 0.0048 |
| 488    | ATP2A2   | ATPASE, CA++ TRANSPORTING, CARDIAC MUSCLE, SLOW TWITCH 2                                          | 0.0065 | 0.0048 |
| 2138   | EYA1     | EYES ABSENT HOMOLOG 1 (DROSOPHILA)                                                                | 0.0004 | 0.0049 |
| 7158   | TP53BP1  | TUMOR PROTEIN P53 BINDING PROTEIN, 1                                                              | 0.0014 | 0.0049 |
| 4771   | NF2      | NEUROFIBROMIN 2 (BILATERAL ACOUSTIC NEUROMA)                                                      | 0.0025 | 0.005  |
| 54549  | SDK2     | SIDEKICK HOMOLOG 2 (CHICKEN)                                                                      | 0.0051 | 0.0055 |
| 83700  | JAM3     | JUNCTIONAL ADHESION MOLECULE 3                                                                    | 0.0043 | 0.0057 |
| 23179  | RGL1     | RAL GUANINE NUCLEOTIDE DISSOCIATION STIMULATOR-LIKE 1                                             | 0.0029 | 0.0058 |
| 1394   | CRHR1    | CORTICOTROPIN RELEASING HORMONE RECEPTOR 1                                                        | 0.009  | 0.0059 |
| 140469 | MYO3B    | MYOSIN IIIB                                                                                       | 0.0093 | 0.006  |
| 9501   | RPH3AL   | RABPHILIN 3A-LIKE (WITHOUT C2 DOMAINS)                                                            | 0.0097 | 0.006  |
| 4035   | LRP1     | LOW DENSITY LIPOPROTEIN-RELATED PROTEIN 1 (ALPHA-2-MACROGLOBULIN RECEPTOR)                        | 0.006  | 0.0062 |
| 51360  | MBTPS2   | MEMBRANE-BOUND TRANSCRIPTION FACTOR PEPTIDASE, SITE 2                                             | 0.0042 | 0.0063 |
| 23176  | SEPT8    | SEPTIN 8                                                                                          | 0.0064 | 0.0065 |

|        |          |                                                                                             |        |        |
|--------|----------|---------------------------------------------------------------------------------------------|--------|--------|
| 79885  | HDAC11   | HISTONE DEACETYLASE 11                                                                      | 0.0064 | 0.0066 |
| 6885   | MAP3K7   | MITOGEN-ACTIVATED PROTEIN KINASE KINASE KINASE 7                                            | 0.0012 | 0.0067 |
| 22986  | SORCS3   | SORTILIN-RELATED VPS10 DOMAIN CONTAINING RECEPTOR 3                                         | 0      | 0.0069 |
| 117531 | TMC1     | TRANSMEMBRANE CHANNEL-LIKE 1                                                                | 0.0025 | 0.0069 |
| 54149  | C21orf91 | CHROMOSOME 21 OPEN READING FRAME 91                                                         | 0.0017 | 0.0072 |
| 2534   | FYN      | FYN ONCOGENE RELATED TO SRC, FGR, YES                                                       | 0.0057 | 0.0076 |
| 58158  | NEUROD4  | NEUROGENIC DIFFERENTIATION 4                                                                | 0.0073 | 0.0076 |
| 153090 | DAB2IP   | NGAP-LIKE PROTEIN                                                                           | 0.0058 | 0.0077 |
| 257194 | NEGR1    | NEURONAL GROWTH REGULATOR 1                                                                 | 0.0069 | 0.0077 |
| 7090   | TLE3     | TRANSDUCIN-LIKE ENHANCER OF SPLIT 3 (E(SP1) HOMOLOG, DROSOPHILA)                            | 0.0034 | 0.0078 |
| 27249  | C2orf25  | CHROMOSOME 2 OPEN READING FRAME 25                                                          | 0.0041 | 0.0078 |
| 5530   | PPP3CA   | PROTEIN PHOSPHATASE 3 (FORMERLY 2B), CATALYTIC SUBUNIT, ALPHA ISOFORM (CALCINEURIN A ALPHA) | 0.0012 | 0.0079 |
| 29     | ABR      | ACTIVE BCR-RELATED GENE                                                                     | 0.0056 | 0.0079 |
| 1268   | CNR1     | CANNABINOID RECEPTOR 1 (BRAIN)                                                              | 0.0026 | 0.0081 |
| 5188   | PET112L  | PET112-LIKE (YEAST)                                                                         | 0.0008 | 0.0082 |
| 57658  | CALCOCO1 | CALCIUM BINDING AND COILED-COIL DOMAIN 1                                                    | 0.0022 | 0.0082 |
| 411    | ARSB     | ARYLSULFATASE B                                                                             | 0.0039 | 0.0084 |
| 64359  | NXN      | NUCLEOREDOXIN                                                                               | 0.0074 | 0.0084 |
| 8671   | SLC4A4   | SOLUTE CARRIER FAMILY 4, SODIUM BICARBONATE COTRANSPORTER, MEMBER 4                         | 0.0007 | 0.0085 |
| 25959  | ANKRD25  | ANKYRIN REPEAT DOMAIN 25                                                                    | 0.0061 | 0.0086 |
| 3732   | CD82     | CD82 ANTIGEN                                                                                | 0.0001 | 0.0092 |
| 113278 | C20orf54 | CHROMOSOME 20 OPEN READING FRAME 54                                                         | 0.0057 | 0.0092 |
| 54584  | GNB1L    | GUANINE NUCLEOTIDE BINDING PROTEIN (G PROTEIN), BETA POLYPEPTIDE 1-LIKE                     | 0.0087 | 0.0093 |
| 26259  | FBXW8    | F-BOX AND WD-40 DOMAIN PROTEIN 8                                                            | 0.0042 | 0.0095 |
| 79139  | DERL1    | DER1-LIKE DOMAIN FAMILY, MEMBER 1                                                           | 0.0066 | 0.0095 |
| 1263   | PLK3     | POLO-LIKE KINASE 3 (DROSOPHILA)                                                             | 0.0031 | 0.0096 |
| 655    | BMP7     | BONE MORPHOGENETIC PROTEIN 7 (OSTEOGENIC PROTEIN 1)                                         | 0.0062 | 0.0096 |
| 4217   | MAP3K5   | MITOGEN-ACTIVATED PROTEIN KINASE KINASE KINASE 5                                            | 0.0082 | 0.0098 |
| 6857   | SYT1     | SYNAPTOTAGMIN I                                                                             | 0.0012 | 0.0099 |
| 596    | BCL2     | B-CELL CLL/LYMPHOMA 2                                                                       | 0.0059 | 0.0099 |
| 23767  | FLRT3    | FIBRONECTIN LEUCINE RICH TRANSMEMBRANE PROTEIN 3                                            | 0.0083 | 0.0099 |

#### Ngn/NeuroD target genes identified by microarray and in PAP computational analysis

| Human/Mouse       |          |         |
|-------------------|----------|---------|
| Ngn/NeuroD matrix |          |         |
| Gene ID           | Symbol   | P-value |
| 9139              | CBFA2T2  | 0       |
| 28514             | DLL1     | 0.0048  |
| 79191             | IRX3     | 0.0002  |
| 58158             | NEUROD4  | 0.0073  |
| 4807              | NHLH1    | 0.0029  |
| 1263              | PLK3     | 0.0031  |
| 5453              | POU3F1   | 0       |
| 5454              | POU3F2   | 0.004   |
| 144165            | PRICKLE1 | 0.0027  |
| 9839              | ZFH1B    | 0       |
| 10472             | ZNF238   | 0.0001  |

| Human/Mouse/Rat   |          |         |
|-------------------|----------|---------|
| Ngn/NeuroD matrix |          |         |
| Gene ID           | Symbol   | P-value |
| 9139              | CBFA2T2  | 0       |
| 28514             | DLL1     | 0.0009  |
| 1995              | ELAVL3   | 0.005   |
| 79191             | IRX3     | 0.0001  |
| 4661              | MYT1     | 0.0035  |
| 58158             | NEUROD4  | 0.0076  |
| 4807              | NHLH1    | 0.0006  |
| 1263              | PLK3     | 0.0096  |
| 5453              | POU3F1   | 0.0015  |
| 144165            | PRICKLE1 | 0.0038  |
| 9839              | ZFH1B    | 0       |
| 10472             | ZNF238   | 0       |

| Intersection      |          |
|-------------------|----------|
| Ngn/NeuroD matrix |          |
| Gene ID           | Symbol   |
| 9139              | CBFA2T2  |
| 28514             | DLL1     |
| 79191             | IRX3     |
| 58158             | NEUROD4  |
| 4807              | NHLH1    |
| 1263              | PLK3     |
| 5453              | POU3F1   |
| 144165            | PRICKLE1 |
| 9839              | ZFH1B    |
| 10472             | ZNF238   |

#### B. M01034 E-box target genes predicted by PAP (365 genes)

| Gene ID | Gene Symbol | Gene name                                                                                |
|---------|-------------|------------------------------------------------------------------------------------------|
| 29      | ABR         | ACTIVE BCR-RELATED GENE                                                                  |
| 43      | ACHE        | ACETYLCHOLINESTERASE (YT BLOOD GROUP)                                                    |
| 97      | ACYP1       | ACYLPHOSPHATASE 1, ERYTHROCYTE (COMMON) TYPE                                             |
| 271     | AMPD2       | ADENOSINE MONOPHOSPHATE DEAMINASE 2 (ISOFORM L)                                          |
| 310     | ANXA7       | ANNEXIN A7                                                                               |
| 364     | AQP7        | AQUAPORIN 7                                                                              |
| 377     | ARF3        | ADP-RIBOSYLATION FACTOR 3                                                                |
| 439     | ASNA1       | ARSA ARSENITE TRANSPORTER, ATP-BINDING, HOMOLOG 1 (BACTERIAL)                            |
| 445     | ASS         | ARGININOSUCCINATE SYNTHETASE                                                             |
| 468     | ATF4        | ACTIVATING TRANSCRIPTION FACTOR 4 (TAX-RESPONSIVE ENHANCER ELEMENT B67)                  |
| 498     | ATP5A1      | ATP SYNTHASE, H+ TRANSPORTING, MITOCHONDRIAL F1 COMPLEX, ALPHA SUBUNIT 1, CARDIAC MUSCLE |
| 498     | ATP5A1      | ATP SYNTHASE, H+ TRANSPORTING, MITOCHONDRIAL F1 COMPLEX, ALPHA SUBUNIT 1, CARDIAC MUSCLE |
| 516     | ATP5G1      | ATP SYNTHASE, H+ TRANSPORTING, MITOCHONDRIAL F0 COMPLEX, SUBUNIT C1 (SUBUNIT 9)          |
| 527     | ATP6V0C     | ATPASE, H+ TRANSPORTING, LYSOSOMAL 16KDA, V0 SUBUNIT C                                   |
| 533     | ATP6V0B     | ATPASE, H+ TRANSPORTING, LYSOSOMAL 21KDA, V0 SUBUNIT B                                   |
| 558     | AXL         | AXL RECEPTOR TYROSINE KINASE                                                             |
| 576     | BAI2        | BRAIN-SPECIFIC ANGIOGENESIS INHIBITOR 2                                                  |
| 598     | BCL2L1      | BCL2-LIKE 1                                                                              |
| 745     | C11ORF9     | CHROMOSOME 11 OPEN READING FRAME 9                                                       |
| 747     | C11ORF11    | CHROMOSOME 11 OPEN READING FRAME 11                                                      |
| 784     | CACNB3      | CALCIUM CHANNEL, VOLTAGE-DEPENDENT, BETA 3 SUBUNIT                                       |
| 844     | CASQ1       | CALSEQUESTRIN 1 (FAST-TWITCH, SKELETAL MUSCLE)                                           |
| 863     | CBFA2T3     | CORE-BINDING FACTOR, RUNT DOMAIN, ALPHA SUBUNIT 2; TRANSLOCATED TO, 3                    |
| 896     | CCND3       | CYCLIN D3                                                                                |
| 1019    | CDK4        | CYCLIN-DEPENDENT KINASE 4                                                                |
| 1152    | CKB         | CREATINE KINASE, BRAIN                                                                   |

|      |         |                                                                                             |
|------|---------|---------------------------------------------------------------------------------------------|
| 1158 | CKM     | CREATINE KINASE, MUSCLE                                                                     |
| 1185 | CLCN6   | CHLORIDE CHANNEL 6                                                                          |
| 1269 | CNR2    | CANNABINOID RECEPTOR 2 (MACROPHAGE)                                                         |
| 1271 | CNTFR   | CILIARY NEUROTROPHIC FACTOR RECEPTOR                                                        |
| 1627 | DBN1    | DREBRIN 1                                                                                   |
| 1654 | DDX3X   | DEAD (ASP-GLU-ALA-ASP) BOX POLYPEPTIDE 3, X-LINKED                                          |
| 1788 | DNMT3A  | DNA (CYTOSINE-5-)-METHYLTRANSFERASE 3 ALPHA                                                 |
| 1841 | DTYMK   | DEOXYTHYMIDYLATE KINASE (THYMIDYLATE KINASE)                                                |
| 1870 | E2F2    | E2F TRANSCRIPTION FACTOR 2                                                                  |
| 1938 | EEF2    | EUKARYOTIC TRANSLATION ELONGATION FACTOR 2                                                  |
| 1952 | CELSR2  | CADHERIN, EGF LAG SEVEN-PASS G-TYPE RECEPTOR 2 (FLAMINGO HOMOLOG, DROSOPHILA)               |
| 1969 | EPHA2   | EPH RECEPTOR A2                                                                             |
| 1994 | ELAVL1  | ELAV (EMBRYONIC LETHAL, ABNORMAL VISION, DROSOPHILA)-LIKE 1 (HU ANTIGEN R)                  |
| 1995 | ELAVL3  | ELAV (EMBRYONIC LETHAL, ABNORMAL VISION, DROSOPHILA)-LIKE 3 (HU ANTIGEN C)                  |
| 2006 | ELN     | ELASTIN (SUPRAVALVULAR AORTIC STENOSIS, WILLIAMS-BEUREN SYNDROME)                           |
| 2048 | EPHB2   | EPH RECEPTOR B2                                                                             |
| 2077 | ERF     | ETS2 REPRESSOR FACTOR                                                                       |
| 2100 | ESR2    | ESTROGEN RECEPTOR 2 (ER BETA)                                                               |
| 2194 | FASN    | FATTY ACID SYNTHASE                                                                         |
| 2251 | FGF6    | FIBROBLAST GROWTH FACTOR 6                                                                  |
| 2256 | FGF11   | FIBROBLAST GROWTH FACTOR 11                                                                 |
| 2318 | FLNC    | FILAMIN C, GAMMA (ACTIN BINDING PROTEIN 280)                                                |
| 2624 | GATA2   | GATA BINDING PROTEIN 2                                                                      |
| 2672 | GF11    | GROWTH FACTOR INDEPENDENT 1                                                                 |
| 2695 | GIP     | GASTRIC INHIBITORY POLYPEPTIDE                                                              |
| 2701 | GJA4    | GAP JUNCTION PROTEIN, ALPHA 4, 37KDA (CONNEXIN 37)                                          |
| 2705 | GJB1    | GAP JUNCTION PROTEIN, BETA 1, 32KDA (CONNEXIN 32, CHARCOT-MARIE-TOOTH NEUROPATHY, X-LINKED) |
| 2710 | GK      | GLYCEROL KINASE                                                                             |
| 2719 | GPC3    | GLYPICAN 3                                                                                  |
| 2775 | GNAO1   | GUANINE NUCLEOTIDE BINDING PROTEIN (G PROTEIN), ALPHA ACTIVATING ACTIVITY POLYPEPTIDE O     |
| 2778 | GNAS    | GNAS COMPLEX LOCUS                                                                          |
| 2799 | GNS     | GLUCOSAMINE (N-ACETYL)-6-SULFATASE (SANFILIPPO DISEASE IIID)                                |
| 2867 | FFAR2   | FREE FATTY ACID RECEPTOR 2                                                                  |
| 2876 | GPX1    | GLUTATHIONE PEROXIDASE 1                                                                    |
| 2886 | GRB7    | GROWTH FACTOR RECEPTOR-BOUND PROTEIN 7                                                      |
| 2957 | GTF2A1  | GENERAL TRANSCRIPTION FACTOR IIA, 1, 19/37KDA                                               |
| 2965 | GTF2H1  | GENERAL TRANSCRIPTION FACTOR IIH, POLYPEPTIDE 1, 62KDA                                      |
| 3073 | HEXA    | HEXOSAMINIDASE A (ALPHA POLYPEPTIDE)                                                        |
| 3131 | HLF     | HEPATIC LEUKEMIA FACTOR                                                                     |
| 3151 | HMGN2   | HIGH-MOBILITY GROUP NUCLEOSOMAL BINDING DOMAIN 2                                            |
| 3162 | HMOX1   | HEME OXYGENASE (DECYCLING) 1                                                                |
| 3164 | NR4A1   | NUCLEAR RECEPTOR SUBFAMILY 4, GROUP A, MEMBER 1                                             |
| 3200 | HOXA3   | HOMEODOMAIN A3                                                                              |
| 3203 | HOXA6   | HOMEODOMAIN A6                                                                              |
| 3204 | HOXA7   | HOMEODOMAIN A7                                                                              |
| 3214 | HOXB4   | HOMEODOMAIN B4                                                                              |
| 3217 | HOXB7   | HOMEODOMAIN B7                                                                              |
| 3297 | HSF1    | HEAT SHOCK TRANSCRIPTION FACTOR 1                                                           |
| 3340 | NDST1   | N-DEACETYLASE/N-SULFOTRANSFERASE (HEPARAN GLUCOSAMINYL) 1                                   |
| 3397 | ID1     | INHIBITOR OF DNA BINDING 1, DOMINANT NEGATIVE HELIX-LOOP-HELIX PROTEIN                      |
| 3609 | ILF3    | INTERLEUKIN ENHANCER BINDING FACTOR 3, 90KDA                                                |
| 3651 | IPF1    | INSULIN PROMOTER FACTOR 1, HOMEODOMAIN TRANSCRIPTION FACTOR                                 |
| 3757 | KCNH2   | POTASSIUM VOLTAGE-GATED CHANNEL, SUBFAMILY H (EAG-RELATED), MEMBER 2                        |
| 3761 | KCNJ4   | POTASSIUM INWARDLY-RECTIFYING CHANNEL, SUBFAMILY J, MEMBER 4                                |
| 3763 | KCNJ6   | POTASSIUM INWARDLY-RECTIFYING CHANNEL, SUBFAMILY J, MEMBER 6                                |
| 3768 | KCNJ12  | POTASSIUM INWARDLY-RECTIFYING CHANNEL, SUBFAMILY J, MEMBER 12                               |
| 3770 | KCNJ14  | POTASSIUM INWARDLY-RECTIFYING CHANNEL, SUBFAMILY J, MEMBER 14                               |
| 3777 | KCNK3   | POTASSIUM CHANNEL, SUBFAMILY K, MEMBER 3                                                    |
| 3784 | KCNQ1   | POTASSIUM VOLTAGE-GATED CHANNEL, KQT-LIKE SUBFAMILY, MEMBER 1                               |
| 3916 | LAMP1   | LYSOSOMAL-ASSOCIATED MEMBRANE PROTEIN 1                                                     |
| 4010 | LMX1B   | LIM HOMEODOMAIN TRANSCRIPTION FACTOR 1, BETA                                                |
| 4046 | LSP1    | LYMPHOCYTE-SPECIFIC PROTEIN 1                                                               |
| 4149 | MAX     | MYC ASSOCIATED FACTOR X                                                                     |
| 4152 | MBD1    | METHYL-CPG BINDING DOMAIN PROTEIN 1                                                         |
| 4287 | ATXN3   | ATAXIN 3                                                                                    |
| 4524 | MTHFR   | 5,10-METHYLENETETRAHYDROFOLATE REDUCTASE (NADPH)                                            |
| 4591 | TRIM37  | TRIPARTITE MOTIF-CONTAINING 37                                                              |
| 4628 | MYH10   | MYOSIN, HEAVY POLYPEPTIDE 10, NON-MUSCLE                                                    |
| 4650 | MYO9B   | MYOSIN IXB                                                                                  |
| 4670 | HNRPM   | HETEROGENEOUS NUCLEAR RIBONUCLEOPROTEIN M                                                   |
| 4691 | NCL     | NUCLEOLIN                                                                                   |
| 4760 | NEUROD1 | NEUROGENIC DIFFERENTIATION 1                                                                |
| 4761 | NEUROD2 | NEUROGENIC DIFFERENTIATION 2                                                                |
| 4784 | NFIX    | NUCLEAR FACTOR I/X (CCAAT-BINDING TRANSCRIPTION FACTOR)                                     |
| 4821 | NKX2-2  | NK2 TRANSCRIPTION FACTOR RELATED, LOCUS 2 (DROSOPHILA)                                      |
| 4831 | NME2    | NON-METASTATIC CELLS 2, PROTEIN (NM23B) EXPRESSED IN                                        |
| 4884 | NPTX1   | NEURONAL PENTRAXIN I                                                                        |
| 4904 | YBX1    | Y BOX BINDING PROTEIN 1                                                                     |
| 4985 | OPRD1   | OPIOID RECEPTOR, DELTA 1                                                                    |
| 5045 | FURIN   | FURIN (PAIRED BASIC AMINO ACID CLEAVING ENZYME)                                             |
| 5076 | PAX2    | PAIRED BOX GENE 2                                                                           |



|       |          |                                                                                         |
|-------|----------|-----------------------------------------------------------------------------------------|
| 5091  | PC       | PYRUVATE CARBOXYLASE                                                                    |
| 5141  | PDE4A    | PHOSPHODIESTERASE 4A, CAMP-SPECIFIC (PHOSPHODIESTERASE E2 DUNCE HOMOLOG, DROSOPHILA)    |
| 5293  | PIK3CD   | PHOSPHOINOSITIDE-3-KINASE, CATALYTIC, DELTA POLYPEPTIDE                                 |
| 5339  | PLEC1    | PLECTIN 1, INTERMEDIATE FILAMENT BINDING PROTEIN 500KDA                                 |
| 5360  | PLTP     | PHOSPHOLIPID TRANSFER PROTEIN                                                           |
| 5414  | SEPT4    | SEPTIN 4                                                                                |
| 5579  | PRKCB1   | PROTEIN KINASE C, BETA 1                                                                |
| 5585  | PKN1     | PROTEIN KINASE N1                                                                       |
| 5605  | MAP2K2   | MITOGEN-ACTIVATED PROTEIN KINASE KINASE 2                                               |
| 5620  | PRM2     | PROTAMINE 2                                                                             |
| 5697  | PYY      | PEPTIDE YY                                                                              |
| 5727  | PTCH     | PATCHED HOMOLOG (DROSOPHILA)                                                            |
| 5866  | RAB3IL1  | RAB3A INTERACTING PROTEIN (RABIN3)-LIKE 1                                               |
| 5883  | RAD9A    | RAD9 HOMOLOG A (S. POMBE)                                                               |
| 5913  | RAPSN    | RECEPTOR-ASSOCIATED PROTEIN OF THE SYNAPSE, 43KD                                        |
| 5914  | RARA     | RETINOIC ACID RECEPTOR, ALPHA                                                           |
| 5916  | RARG     | RETINOIC ACID RECEPTOR, GAMMA                                                           |
| 5989  | RFX1     | REGULATORY FACTOR X, 1 (INFLUENCES HLA CLASS II EXPRESSION)                             |
| 6097  | RORC     | RAR-RELATED ORPHAN RECEPTOR C                                                           |
| 6117  | RPA1     | REPLICATION PROTEIN A1, 70KDA                                                           |
| 6208  | RPS14    | RIBOSOMAL PROTEIN S14                                                                   |
| 6256  | RXRA     | RETINOID X RECEPTOR, ALPHA                                                              |
| 6405  | SEMA3F   | SEMA DOMAIN, IMMUNOGLOBULIN DOMAIN (IG), SHORT BASIC DOMAIN, SECRETED, (SEMAPHORIN) 3F  |
| 6449  | SGTA     | SMALL GLUTAMINE-RICH TETRATRIPEPTIDE REPEAT (TPR)-CONTAINING, ALPHA                     |
| 6455  | SH3GL1   | SH3-DOMAIN GRB2-LIKE 1                                                                  |
| 6525  | SMTN     | SMOOTHELIN                                                                              |
| 6530  | SLC6A2   | SOLUTE CARRIER FAMILY 6 (NEUROTRANSMITTER TRANSPORTER, NORADRENALIN), MEMBER 2          |
| 6536  | SLC6A9   | SOLUTE CARRIER FAMILY 6 (NEUROTRANSMITTER TRANSPORTER, GLYCINE), MEMBER 9               |
| 6612  | SUMO3    | SMT3 SUPPRESSOR OF MIF TWO 3 HOMOLOG 3 (YEAST)                                          |
| 6776  | STAT5A   | SIGNAL TRANSDUCER AND ACTIVATOR OF TRANSCRIPTION 5A                                     |
| 6809  | STX3A    | SYNTAXIN 3A                                                                             |
| 6812  | STXBP1   | SYNTAXIN BINDING PROTEIN 1                                                              |
| 6932  | TCF7     | TRANSCRIPTION FACTOR 7 (T-CELL SPECIFIC, HMG-BOX)                                       |
| 6945  | MLX      | MAX-LIKE PROTEIN X                                                                      |
| 7008  | TEF      | THYROTROPHIC EMBRYONIC FACTOR                                                           |
| 7064  | THOP1    | THIMET OLIGOPEPTIDASE 1                                                                 |
| 7142  | TNP2     | TRANSITION PROTEIN 2 (DURING HISTONE TO PROTAMINE REPLACEMENT)                          |
| 7161  | TP73     | TUMOR PROTEIN P73                                                                       |
| 7186  | TRAF2    | TNF RECEPTOR-ASSOCIATED FACTOR 2                                                        |
| 7205  | TRIP6    | THYROID HORMONE RECEPTOR INTERACTOR 6                                                   |
| 7320  | UBE2B    | UBIQUITIN-CONJUGATING ENZYME E2B (RAD6 HOMOLOG)                                         |
| 7343  | UBTF     | UPSTREAM BINDING TRANSCRIPTION FACTOR, RNA POLYMERASE I                                 |
| 7477  | WNT7B    | WINGLESS-TYPE MMTV INTEGRATION SITE FAMILY, MEMBER 7B                                   |
| 7483  | WNT9A    | WINGLESS-TYPE MMTV INTEGRATION SITE FAMILY, MEMBER 9A                                   |
| 7535  | ZAP70    | ZETA-CHAIN (TCR) ASSOCIATED PROTEIN KINASE 70KDA                                        |
| 7866  | IFRD2    | INTERFERON-RELATED DEVELOPMENTAL REGULATOR 2                                            |
| 8398  | PLA2G6   | PHOSPHOLIPASE A2, GROUP VI (CYTOSOLIC, CALCIUM-INDEPENDENT)                             |
| 8431  | NROB2    | NUCLEAR RECEPTOR SUBFAMILY 0, GROUP B, MEMBER 2                                         |
| 8508  | NIPSNAP1 | NIPSNAP HOMOLOG 1 (C. ELEGANS)                                                          |
| 8662  | EIF3S9   | EUKARYOTIC TRANSLATION INITIATION FACTOR 3, SUBUNIT 9 ETA, 116KDA                       |
| 8763  | CD164    | CD164 ANTIGEN, SIALOMUCIN                                                               |
| 8775  | NAPA     | N-ETHYLMALEIMIDE-SENSITIVE FACTOR ATTACHMENT PROTEIN, ALPHA                             |
| 8878  | SQSTM1   | SEQUESTOSOME 1                                                                          |
| 8913  | CACNA1G  | CALCIUM CHANNEL, VOLTAGE-DEPENDENT, ALPHA 1G SUBUNIT                                    |
| 9066  | SYT7     | SYNAPTOTAGMIN VII                                                                       |
| 9093  | DNAJA3   | DNAJ (HSP40) HOMOLOG, SUBFAMILY A, MEMBER 3                                             |
| 9099  | USP2     | UBIQUITIN SPECIFIC PEPTIDASE 2                                                          |
| 9110  | MTMR4    | MYOTUBULARIN RELATED PROTEIN 4                                                          |
| 9114  | ATP6V0D1 | ATPASE, H+ TRANSPORTING, LYSOSOMAL 38KDA, V0 SUBUNIT D1                                 |
| 9254  | CACNA2D2 | CALCIUM CHANNEL, VOLTAGE-DEPENDENT, ALPHA 2/DELTA SUBUNIT 2                             |
| 9258  | MFHAS1   | MALIGNANT FIBROUS HISTIOCYTOMA AMPLIFIED SEQUENCE 1                                     |
| 9342  | SNAP29   | SYNAPTOSOMAL-ASSOCIATED PROTEIN, 29KDA                                                  |
| 9377  | COX5A    | CYTOCHROME C OXIDASE SUBUNIT VA                                                         |
| 9572  | NR1D1    | NUCLEAR RECEPTOR SUBFAMILY 1, GROUP D, MEMBER 1                                         |
| 9655  | SOC5     | SUPPRESSOR OF CYTOKINE SIGNALING 5                                                      |
| 9885  | OSBPL2   | OXYSTEROL BINDING PROTEIN-LIKE 2                                                        |
| 9967  | THRAP3   | THYROID HORMONE RECEPTOR ASSOCIATED PROTEIN 3                                           |
| 10039 | PARP3    | POLY (ADP-RIBOSE) POLYMERASE FAMILY, MEMBER 3                                           |
| 10136 | ELA3B    | ELASTASE 3A, PANCREATIC                                                                 |
| 10136 | ELA3A    | ELASTASE 3A, PANCREATIC                                                                 |
| 10159 | ATP6AP2  | ATPASE, H+ TRANSPORTING, LYSOSOMAL ACCESSORY PROTEIN 2                                  |
| 10289 | EIF1B    | EUKARYOTIC TRANSLATION INITIATION FACTOR 1B                                             |
| 10330 | TMEM4    | TRANSMEMBRANE PROTEIN 4                                                                 |
| 10411 | RAPGEF3  | RAP GUANINE NUCLEOTIDE EXCHANGE FACTOR (GEF) 3                                          |
| 10435 | CDC42EP2 | CDC42 EFFECTOR PROTEIN (RHO GTPASE BINDING) 2                                           |
| 10482 | NXF1     | NUCLEAR RNA EXPORT FACTOR 1                                                             |
| 10501 | SEMA6B   | SEMA DOMAIN, TRANSMEMBRANE DOMAIN (TM), AND CYTOPLASMIC DOMAIN, (SEMAPHORIN) 6B         |
| 10564 | ARFGEF2  | ADP-RIBOSYLATION FACTOR GUANINE NUCLEOTIDE-EXCHANGE FACTOR 2 (BREFELDIN A-INHIBITED)    |
| 10629 | TAF6L    | TAF6-LIKE RNA POLYMERASE II, P300/CBP-ASSOCIATED FACTOR (PCAF)-ASSOCIATED FACTOR, 65KDA |
| 10672 | GNA13    | GUANINE NUCLEOTIDE BINDING PROTEIN (G PROTEIN), ALPHA 13                                |
| 10814 | CPLX2    | COMPLEXIN 2                                                                             |

|       |               |                                                                     |
|-------|---------------|---------------------------------------------------------------------|
| 10867 | TSPAN9        | TETRASPANIN 9                                                       |
| 10900 | RPIP8         | RAP2 INTERACTING PROTEIN 8                                          |
| 11060 | WWP2          | WW DOMAIN CONTAINING E3 UBIQUITIN PROTEIN LIGASE 2                  |
| 11078 | TRIOBP        | TRIO AND F-ACTIN BINDING PROTEIN                                    |
| 11152 | WDR45         | WD REPEAT DOMAIN 45                                                 |
| 11240 | PADI2         | PEPTIDYL ARGININE DEIMINASE, TYPE II                                |
| 11248 | NXPH3         | NEUREXOPHILIN 3                                                     |
| 11330 | CTRC          | CHYMOTRYPSIN C (CALDECRIN)                                          |
| 11337 | GABARAP       | GABA(A) RECEPTOR-ASSOCIATED PROTEIN                                 |
| 22839 | DLGAP4        | DISCS, LARGE (DROSOPHILA) HOMOLOG-ASSOCIATED PROTEIN 4              |
| 22845 | TMEM15        | TRANSMEMBRANE PROTEIN 15                                            |
| 22888 | UBOX5         | U-BOX DOMAIN CONTAINING 5                                           |
| 23038 | WDTC1         | WD AND TETRATRICOPEPTIDE REPEATS 1                                  |
| 23054 | NCOA6         | NUCLEAR RECEPTOR COACTIVATOR 6                                      |
| 23116 | KIAA0423      | KIAA0423                                                            |
| 23152 | CIC           | CAPICUA HOMOLOG (DROSOPHILA)                                        |
| 23187 | PHLDB1        | PLECKSTRIN HOMOLOGY-LIKE DOMAIN, FAMILY B, MEMBER 1                 |
| 23199 | KIAA0182      | KIAA0182                                                            |
| 23246 | BOP1          | BLOCK OF PROLIFERATION 1                                            |
| 23729 | CARKL         | CARBOHYDRATE KINASE-LIKE                                            |
| 23764 | MAFF          | V-MAF MUSCULOAPONEUROTIC FIBROSARCOMA ONCOGENE HOMOLOG F (AVIAN)    |
| 25764 | SERF2         | SMALL EDRK-RICH FACTOR 2                                            |
| 25764 | HYPK          | SMALL EDRK-RICH FACTOR 2                                            |
| 25796 | PGLS          | 6-PHOSPHOGLUCONOLACTONASE                                           |
| 25822 | DNAJB5        | DNAJ (HSP40) HOMOLOG, SUBFAMILY B, MEMBER 5                         |
| 25841 | ABTB2         | ANKYRIN REPEAT AND BTB (POZ) DOMAIN CONTAINING 2                    |
| 25911 | RP11-529I10.4 | DELETED IN A MOUSE MODEL OF PRIMARY CILIARY DYSKINESIA              |
| 25915 | C3ORF60       | CHROMOSOME 3 OPEN READING FRAME 60                                  |
| 26574 | AATF          | APOPTOSIS ANTAGONIZING TRANSCRIPTION FACTOR                         |
| 27113 | BBC3          | BCL2 BINDING COMPONENT 3                                            |
| 27166 | PX19          | PX19-LIKE PROTEIN                                                   |
| 27343 | POLL          | POLYMERASE (DNA DIRECTED), LAMBDA                                   |
| 28987 | PSMD8BP1      | PSMD8 BINDING PROTEIN 1                                             |
| 29078 | C6ORF66       | CHROMOSOME 6 OPEN READING FRAME 66                                  |
| 29110 | TBK1          | TANK-BINDING KINASE 1                                               |
| 29117 | BRD7          | BROMODOMAIN CONTAINING 7                                            |
| 29886 | SNX8          | SORTING NEXIN 8                                                     |
| 29890 | RBM15B        | RNA BINDING MOTIF PROTEIN 15B                                       |
| 29904 | EEF2K         | EUKARYOTIC ELONGATION FACTOR-2 KINASE                               |
| 29911 | HOOK2         | HOOK HOMOLOG 2 (DROSOPHILA)                                         |
| 29919 | C18ORF8       | CHROMOSOME 18 OPEN READING FRAME 8                                  |
| 29920 | PYCR2         | PYRROLINE-5-CARBOXYLATE REDUCTASE FAMILY, MEMBER 2                  |
| 29942 | PURG          | PURINE-RICH ELEMENT BINDING PROTEIN G                               |
| 30000 | TNPO2         | TRANSPORTIN 2 (IMPORTIN 3, KARYOPHERIN BETA 2B)                     |
| 50813 | COPS7A        | COP9 CONSTITUTIVE PHOTOMORPHOGENIC HOMOLOG SUBUNIT 7A (ARABIDOPSIS) |
| 50863 | HNT           | NEUROTRIMIN                                                         |
| 51005 | AMDHD2        | AMIDOHYDROLASE DOMAIN CONTAINING 2                                  |
| 51035 | LOC51035      | UNKNOWN PROTEIN LOC51035                                            |
| 51043 | ZBTB7B        | ZINC FINGER AND BTB DOMAIN CONTAINING 7B                            |
| 51063 | FAM26B        | FAMILY WITH SEQUENCE SIMILARITY 26, MEMBER B                        |
| 51087 | YBX2          | Y BOX BINDING PROTEIN 2                                             |
| 51107 | APH1A         | ANTERIOR PHARYNX DEFECTIVE 1 HOMOLOG A (C. ELEGANS)                 |
| 51117 | COQ4          | COENZYME Q4 HOMOLOG (YEAST)                                         |
| 51150 | SDF4          | STROMAL CELL DERIVED FACTOR 4                                       |
| 51172 | NAGPA         | N-ACETYLGLUCOSAMINE-1-PHOSPHODIESTER ALPHA-N-ACETYLGLUCOSAMINIDASE  |
| 51303 | FKBP11        | FK506 BINDING PROTEIN 11, 19 KDA                                    |
| 51330 | TNFRSF12A     | TUMOR NECROSIS FACTOR RECEPTOR SUPERFAMILY, MEMBER 12A              |
| 51343 | FZR1          | HOMOLOG OF YEAST CDH1/HCT1                                          |
| 51566 | ARMCX3        | ARMADILLO REPEAT CONTAINING, X-LINKED 3                             |
| 51588 | PIAS4         | PROTEIN INHIBITOR OF ACTIVATED STAT, 4                              |
| 51593 | ARS2          | ARS2 PROTEIN                                                        |
| 51621 | KLF13         | KRUPPEL-LIKE FACTOR 13                                              |
| 51643 | TMBIM4        | TRANSMEMBRANE BAX INHIBITOR MOTIF CONTAINING 4                      |
| 54361 | WNT4          | WINGLESS-TYPE MMTV INTEGRATION SITE FAMILY, MEMBER 4                |
| 54443 | ANLN          | ANILLIN, ACTIN BINDING PROTEIN (SCRAPS HOMOLOG, DROSOPHILA)         |
| 54567 | DLL4          | DELTA-LIKE 4 (DROSOPHILA)                                           |
| 54808 | DYM           | DYMECLIN                                                            |
| 54813 | BTBD5         | BTB (POZ) DOMAIN CONTAINING 5                                       |
| 54815 | GATAD2A       | GATA ZINC FINGER DOMAIN CONTAINING 2A                               |
| 55152 | DALRD3        | DALR ANTICODON BINDING DOMAIN CONTAINING 3                          |
| 55163 | PNPO          | PYRIDOXINE 5'-PHOSPHATE OXIDASE                                     |
| 55182 | C1ORF164      | HYPOTHETICAL PROTEIN LOC51261                                       |
| 55260 | FLJ10922      | HYPOTHETICAL PROTEIN FLJ10922                                       |
| 55352 | C17ORF79      | CHROMOSOME 17 OPEN READING FRAME 79                                 |
| 55644 | OSGEP         | O-SIALOGLYCOPROTEIN ENDOPEPTIDASE                                   |
| 55715 | DOK4          | DOCKING PROTEIN 4                                                   |
| 55787 | CXORF15       | CHROMOSOME X OPEN READING FRAME 15                                  |
| 55809 | TRERF1        | TRANSCRIPTIONAL REGULATING FACTOR 1                                 |
| 55852 | TEX2          | TESTIS EXPRESSED SEQUENCE 2                                         |
| 56180 | MOSPD1        | MOTILE SPERM DOMAIN CONTAINING 1                                    |
| 57101 | TMEM16B       | TRANSMEMBRANE PROTEIN 16B                                           |

|        |               |                                                                                                                 |
|--------|---------------|-----------------------------------------------------------------------------------------------------------------|
| 57192  | MCOLN1        | MUCOLIPIN 1                                                                                                     |
| 57410  | SCYL1         | SCY1-LIKE 1 (S. CEREVISIAE)                                                                                     |
| 57524  | CASKIN1       | CASK INTERACTING PROTEIN 1                                                                                      |
| 57597  | BAHCC1        | BAH DOMAIN AND COILED-COIL CONTAINING 1                                                                         |
| 57622  | LRFN1         | LEUCINE RICH REPEAT AND FIBRONECTIN TYPE III DOMAIN CONTAINING 1                                                |
| 59269  | HIVEP3        | HUMAN IMMUNODEFICIENCY VIRUS TYPE I ENHANCER BINDING PROTEIN 3                                                  |
| 60625  | DHX35         | DEAH (ASP-GLU-ALA-HIS) BOX POLYPEPTIDE 35                                                                       |
| 63976  | PRDM16        | PR DOMAIN CONTAINING 16                                                                                         |
| 64072  | CDH23         | CADHERIN-LIKE 23                                                                                                |
| 64093  | SMOC1         | SPARC RELATED MODULAR CALCIUM BINDING 1                                                                         |
| 64211  | LHX5          | LIM HOMEBOX 5                                                                                                   |
| 64284  | RAB17         | RAB17, MEMBER RAS ONCOGENE FAMILY                                                                               |
| 64773  | FAM113A       | FAMILY WITH SEQUENCE SIMILARITY 113, MEMBER A                                                                   |
| 64926  | FLJ21438      | HYPOTHETICAL PROTEIN FLJ21438                                                                                   |
| 64979  | MRPL36        | MITOCHONDRIAL RIBOSOMAL PROTEIN L36                                                                             |
| 65082  | VPS33A        | VACUOLAR PROTEIN SORTING 33A (YEAST)                                                                            |
| 65260  | C1ORF163      | CHROMOSOME 1 OPEN READING FRAME 163                                                                             |
| 78995  | C17ORF53      | CHROMOSOME 17 OPEN READING FRAME 53                                                                             |
| 78999  | LRFN4         | LEUCINE RICH REPEAT AND FIBRONECTIN TYPE III DOMAIN CONTAINING 4                                                |
| 79002  | MGC2803       | HYPOTHETICAL PROTEIN MGC2803                                                                                    |
| 79064  | MGC3196       | HYPOTHETICAL PROTEIN MGC3196                                                                                    |
| 79094  | CHAC1         | CHAC, CATION TRANSPORT REGULATOR-LIKE 1 (E. COLI)                                                               |
| 79102  | RNF26         | RING FINGER PROTEIN 26                                                                                          |
| 79624  | C6ORF211      | CHROMOSOME 6 OPEN READING FRAME 211                                                                             |
| 79630  | C1ORF54       | CHROMOSOME 1 OPEN READING FRAME 54                                                                              |
| 79794  | C12ORF49      | CHROMOSOME 12 OPEN READING FRAME 49                                                                             |
| 79816  | TLE6          | TRANSDUCIN-LIKE ENHANCER OF SPLIT 6 (E(SP1) HOMOLOG, DROSOPHILA)                                                |
| 79827  | ASAM          | ADIPOCYTE-SPECIFIC ADHESION MOLECULE                                                                            |
| 79829  | NAT11         | HYPOTHETICAL PROTEIN FLJ13848                                                                                   |
| 79837  | PIP5K2C       | PHOSPHATIDYLINOSITOL-4-PHOSPHATE 5-KINASE, TYPE II, GAMMA                                                       |
| 79924  | ADM2          | ADRENOMEDULLIN 2                                                                                                |
| 79960  | PHF17         | PHD FINGER PROTEIN 17                                                                                           |
| 80149  | ZC3H12A       | ZINC FINGER CCCH-TYPE CONTAINING 12A                                                                            |
| 80305  | RP3-402G11.12 | HYPOTHETICAL PROTEIN PP2447                                                                                     |
| 80326  | WNT10A        | WINGLESS-TYPE MMTV INTEGRATION SITE FAMILY, MEMBER 10A                                                          |
| 80342  | TRAF3IP3      | TRAF3 INTERACTING PROTEIN 3                                                                                     |
| 80757  | TMEM121       | TRANSMEMBRANE PROTEIN 121                                                                                       |
| 81543  | LRRC3         | LEUCINE RICH REPEAT CONTAINING 3                                                                                |
| 81693  | AMN           | AMNIONLESS HOMOLOG (MOUSE)                                                                                      |
| 81794  | ADAMTS10      | ADAM METALLOPEPTIDASE WITH THROMBOSPONDIN TYPE 1 MOTIF, 10                                                      |
| 81848  | SPRY4         | SPROUTY HOMOLOG 4 (DROSOPHILA)                                                                                  |
| 81890  | QTRT1         | QUEUINE TRNA-RIBOSYLTRANSFERASE 1 (TRNA-GUANINE TRANSGLYCOSYLASE)                                               |
| 83451  | ABHD11        | ABHYDROLASE DOMAIN CONTAINING 11                                                                                |
| 83475  | HLRC1         | HEAT-LIKE (PBS LYASE) REPEAT CONTAINING 1                                                                       |
| 83605  | CCM2          | CEREBRAL CAVERNOUS MALFORMATION 2                                                                               |
| 83855  | KLF16         | KRUPPEL-LIKE FACTOR 16                                                                                          |
| 84152  | PPP1R1B       | PROTEIN PHOSPHATASE 1, REGULATORY (INHIBITOR) SUBUNIT 1B (DOPAMINE AND CAMP REGULATED PHOSPHOPROTEIN, DARPP-32) |
| 84249  | PSD2          | PLECKSTRIN AND SEC7 DOMAIN CONTAINING 2                                                                         |
| 84254  | CAMKK1        | CALCIUM/CALMODULIN-DEPENDENT PROTEIN KINASE KINASE 1, ALPHA                                                     |
| 84445  | LZTS2         | LEUCINE ZIPPER, PUTATIVE TUMOR SUPPRESSOR 2                                                                     |
| 84752  | MGC4655       | HYPOTHETICAL PROTEIN MGC4655                                                                                    |
| 84900  | TMEM118       | TRANSMEMBRANE PROTEIN 118                                                                                       |
| 85352  | KIAA1644      | KIAA1644 PROTEIN                                                                                                |
| 85457  | KIAA1737      | KIAA1737                                                                                                        |
| 89796  | NAV1          | HYPOTHETICAL PROTEIN MGC14961                                                                                   |
| 90529  | C1ORF201      | CHROMOSOME 1 OPEN READING FRAME 201                                                                             |
| 90701  | SEC11L3       | SEC11-LIKE 3 (S. CEREVISIAE)                                                                                    |
| 92140  | MTDH          | METADHERIN                                                                                                      |
| 92979  | MARCH9        | MEMBRANE-ASSOCIATED RING FINGER (C3HC4) 9                                                                       |
| 93611  | FBXO44        | F-BOX PROTEIN 44                                                                                                |
| 114907 | FBXO32        | F-BOX PROTEIN 32                                                                                                |
| 115106 | CCDC5         | COILED-COIL DOMAIN CONTAINING 5 (SPINDLE ASSOCIATED)                                                            |
| 115992 | RNF166        | RING FINGER PROTEIN 166                                                                                         |
| 116534 | MRGPRE        | MAS-RELATED GPR, MEMBER E                                                                                       |
| 124044 | MGC26885      | HYPOTHETICAL PROTEIN MGC26885                                                                                   |
| 124842 | TMEM132E      | TRANSMEMBRANE PROTEIN 132E                                                                                      |
| 126282 | TNFAIP8L1     | TUMOR NECROSIS FACTOR, ALPHA-INDUCED PROTEIN 8-LIKE 1                                                           |
| 126526 | FLJ36888      | HYPOTHETICAL PROTEIN FLJ36888                                                                                   |
| 126792 | B3GALT6       | UDP-GAL:BETAGAL BETA 1,3-GALACTOSYLTRANSFERASE POLYPEPTIDE 6                                                    |
| 129303 | FLJ90024      | FASTING-INDUCIBLE INTEGRAL MEMBRANE PROTEIN TM6P1                                                               |
| 129685 | TBN           | TAUBE NUSS HOMOLOG (MOUSE)                                                                                      |
| 133522 | PPARGC1B      | PEROXISOME PROLIFERATIVE ACTIVATED RECEPTOR, GAMMA, COACTIVATOR 1, BETA                                         |
| 138151 | BTBD14A       | BTB (POZ) DOMAIN CONTAINING 14A                                                                                 |
| 140606 | SELM          | SELENOPROTEIN M                                                                                                 |
| 140628 | GATA5         | GATA BINDING PROTEIN 5                                                                                          |
| 145258 | GSC           | GOOSECOID                                                                                                       |
| 146433 | MGC34647      | HYPOTHETICAL PROTEIN MGC34647                                                                                   |
| 146556 | MGC45438      | HYPOTHETICAL PROTEIN MGC45438                                                                                   |
| 146956 | EME1          | ESSENTIAL MEIOTIC ENDONUCLEASE 1 HOMOLOG 1 (S. POMBE)                                                           |
| 147700 | KLC3          | KINESIN LIGHT CHAIN 3                                                                                           |
| 151648 | SGOL1         | SHUGOSHIN-LIKE 1 (S. POMBE)                                                                                     |

|        |           |                                                                        |
|--------|-----------|------------------------------------------------------------------------|
| 158135 | TLL11     | TUBULIN TYROSINE LIGASE-LIKE FAMILY, MEMBER 11                         |
| 161882 | ZFPM1     | ZINC FINGER PROTEIN, MULTITYPE 1                                       |
| 168850 | LOC168850 | HYPOTHETICAL PROTEIN LOC168850                                         |
| 197135 | LOC197135 | HYPOTHETICAL LOC197135                                                 |
| 200185 | KRTCAP2   | KERATINOCYTE ASSOCIATED PROTEIN 2                                      |
| 201232 | SLC16A13  | SOLUTE CARRIER FAMILY 16 (MONOCARBOXYLIC ACID TRANSPORTERS), MEMBER 13 |
| 206358 | SLC36A1   | LYSOSOMAL AMINO ACID TRANSPORTER 1                                     |
| 219738 | C10ORF35  | CHROMOSOME 10 OPEN READING FRAME 35                                    |
| 220972 | MARCH8    | MEMBRANE-ASSOCIATED RING FINGER (C3HC4) 8                              |
| 283455 | KSR2      | KINASE SUPPRESSOR OF RAS 2                                             |
| 284069 | MGC34829  | SIMILAR TO HYPOTHETICAL GENE SUPPORTED BY AL050367; AK022946           |
| 284358 | FLJ36070  | HYPOTHETICAL PROTEIN FLJ36070                                          |
| 284723 | SLC25A34  | SOLUTE CARRIER FAMILY 25, MEMBER 34                                    |
| 339287 | LOC339287 | HYPOTHETICAL PROTEIN LOC339287                                         |
| 348110 | C15ORF38  | HYPOTHETICAL PROTEIN FLJ35955                                          |
| 388630 | LOC388630 | SIMILAR TO C05G5.5                                                     |
| 390880 | LOC390880 | SIMILAR TO NUCLEAR FACTOR, INTERLEUKIN 3 REGULATED                     |

**C. Myc-Max M00118 target genes predicted by PAP (127 genes)**

| Gene ID | Gene symbol | Gene name                                                                                |
|---------|-------------|------------------------------------------------------------------------------------------|
| 95      | ACY1        | AMINOACYLASE 1                                                                           |
| 151     | ADRA2B      | ADRENERGIC, ALPHA-2B-, RECEPTOR                                                          |
| 271     | AMPD2       | ADENOSINE MONOPHOSPHATE DEAMINASE 2 (ISOFORM L)                                          |
| 403     | ARL3        | ADP-RIBOSYLATION FACTOR-LIKE 3                                                           |
| 595     | CCND1       | CYCLIN D1                                                                                |
| 605     | BCL7A       | B-CELL CLL/LYMPHOMA 7A                                                                   |
| 666     | BOK         | BCL2-RELATED OVARIAN KILLER                                                              |
| 672     | BRCA1       | BREAST CANCER 1, EARLY ONSET                                                             |
| 745     | C11ORF9     | CHROMOSOME 11 OPEN READING FRAME 9                                                       |
| 771     | CA12        | CARBONIC ANHYDRASE XII                                                                   |
| 875     | CBS         | CYSTATHIONINE-BETA-SYNTASE                                                               |
| 914     | CD2         | CD2 ANTIGEN (P50), SHEEP RED BLOOD CELL RECEPTOR                                         |
| 1152    | CKB         | CREATINE KINASE, BRAIN                                                                   |
| 1489    | CTF1        | CARDIOTROPHIN 1                                                                          |
| 1678    | TIMM8A      | TRANSLOCASE OF INNER MITOCHONDRIAL MEMBRANE 8 HOMOLOG A (YEAST)                          |
| 1757    | SARDH       | SARCOSINE DEHYDROGENASE                                                                  |
| 1995    | ELAVL3      | ELAV (EMBRYONIC LETHAL, ABNORMAL VISION, DROSOPHILA)-LIKE 3 (HU ANTIGEN C)               |
| 2135    | EXTL2       | EXOSTOSES (MULTIPLE)-LIKE 2                                                              |
| 2251    | FGF6        | FIBROBLAST GROWTH FACTOR 6                                                               |
| 2354    | FOSB        | FBJ MURINE OSTEOSARCOMA VIRAL ONCOGENE HOMOLOG B                                         |
| 2672    | GF11        | GROWTH FACTOR INDEPENDENT 1                                                              |
| 2695    | GIP         | GASTRIC INHIBITORY POLYPEPTIDE                                                           |
| 2780    | GNAT2       | GUANINE NUCLEOTIDE BINDING PROTEIN (G PROTEIN), ALPHA TRANSDUCING ACTIVITY POLYPEPTIDE 2 |
| 2957    | GTF2A1      | GENERAL TRANSCRIPTION FACTOR IIA, 1, 19/37KDA                                            |
| 3036    | HAS1        | HYALURONAN SYNTHASE 1                                                                    |
| 3151    | HMG2        | HIGH-MOBILITY GROUP NUCLEOSOMAL BINDING DOMAIN 2                                         |
| 3231    | HOXD1       | HOMEODOMAIN D1                                                                           |
| 3232    | HOXD3       | HOMEODOMAIN D3                                                                           |
| 3344    | HTLF        | HUMAN T-CELL LEUKEMIA VIRUS ENHANCER FACTOR                                              |
| 3643    | INSR        | INSULIN RECEPTOR                                                                         |
| 3892    | KRTHB1      | KERATIN, HAIR, BASIC, 1                                                                  |
| 3892    | KRTHB6      | KERATIN, HAIR, BASIC, 1                                                                  |
| 3925    | STMN1       | STATHMIN 1/ONCOPROTEIN 18                                                                |
| 4084    | MXD1        | MAX DIMERIZATION PROTEIN 1                                                               |
| 4144    | MAT2A       | METHIONINE ADENOSYLTRANSFERASE II, ALPHA                                                 |
| 4261    | CIITA       | CLASS II, MAJOR HISTOCOMPATIBILITY COMPLEX, TRANSACTIVATOR                               |
| 4297    | MLL         | MYELOID/LYMPHOID OR MIXED-LINEAGE LEUKEMIA (TRITHORAX HOMOLOG, DROSOPHILA)               |
| 4831    | NME2        | NON-METASTATIC CELLS 2, PROTEIN (NM23B) EXPRESSED IN                                     |
| 4893    | KRAS        | V-HA-RAS HARVEY RAT SARCOMA VIRAL ONCOGENE HOMOLOG                                       |
| 4893    | NRAS        | V-HA-RAS HARVEY RAT SARCOMA VIRAL ONCOGENE HOMOLOG                                       |
| 4893    | HRAS        | V-HA-RAS HARVEY RAT SARCOMA VIRAL ONCOGENE HOMOLOG                                       |
| 4953    | ODC1        | ORNITHINE DECARBOXYLASE 1                                                                |
| 4985    | OPRD1       | OPIOID RECEPTOR, DELTA 1                                                                 |
| 5464    | PPA1        | PYROPHOSPHATASE (INORGANIC) 1                                                            |
| 5536    | PPP5C       | PROTEIN PHOSPHATASE 5, CATALYTIC SUBUNIT                                                 |
| 5727    | PTCH        | PATCHED HOMOLOG (DROSOPHILA)                                                             |
| 5757    | PTMA        | PROTHYMOSIN, ALPHA (GENE SEQUENCE 28)                                                    |
| 6449    | SGTA        | SMALL GLUTAMINE-RICH TETRATRICOPEPTIDE REPEAT (TPR)-CONTAINING, ALPHA                    |
| 6512    | SLC1A7      | SOLUTE CARRIER FAMILY 1 (GLUTAMATE TRANSPORTER), MEMBER 7                                |
| 6949    | TCOF1       | TREACHER COLLINS-FRANCESCHETTI SYNDROME 1                                                |
| 7023    | TFAP4       | TRANSCRIPTION FACTOR AP-4 (ACTIVATING ENHANCER BINDING PROTEIN 4)                        |
| 7064    | THOP1       | THIMET OLIGOPEPTIDASE 1                                                                  |
| 7277    | TUBA1       | TUBULIN, ALPHA 1 (TESTIS SPECIFIC)                                                       |
| 7291    | TWIST1      | TWIST HOMOLOG 1 (ACROCEPHALOSYNDACTYLY 3; SAETHRE-CHOTZEN SYNDROME) (DROSOPHILA)         |
| 7417    | VDAC2       | VOLTAGE-DEPENDENT ANION CHANNEL 2                                                        |
| 8324    | FZD7        | FRIZZLED HOMOLOG 7 (DROSOPHILA)                                                          |
| 8786    | RGS11       | REGULATOR OF G-PROTEIN SIGNALLING 11                                                     |
| 9274    | BCL7C       | B-CELL CLL/LYMPHOMA 7C                                                                   |
| 9638    | FEZ1        | FASCICULATION AND ELONGATION PROTEIN ZETA 1 (ZYGIN I)                                    |
| 9639    | ARHGEF10    | RHO GUANINE NUCLEOTIDE EXCHANGE FACTOR (GEF) 10                                          |
| 9958    | USP15       | UBIQUITIN SPECIFIC PEPTIDASE 15                                                          |
| 9960    | USP3        | UBIQUITIN SPECIFIC PEPTIDASE 3                                                           |
| 10171   | RCL1        | RNA TERMINAL PHOSPHATE CYCLASE-LIKE 1                                                    |
| 10205   | EVA1        | EPITHELIAL V-LIKE ANTIGEN 1                                                              |
| 10376   | K-ALPHA-1   | TUBULIN, ALPHA, UBIQUITOUS                                                               |
| 10376   | TUBA6       | TUBULIN, ALPHA, UBIQUITOUS                                                               |
| 10379   | RNF31       | INTERFERON-STIMULATED TRANSCRIPTION FACTOR 3, GAMMA 48KDA                                |
| 10379   | ISGF3G      | INTERFERON-STIMULATED TRANSCRIPTION FACTOR 3, GAMMA 48KDA                                |
| 10411   | RAPGEF3     | RAP GUANINE NUCLEOTIDE EXCHANGE FACTOR (GEF) 3                                           |
| 10420   | TESK2       | TESTIS-SPECIFIC KINASE 2                                                                 |
| 10492   | SYNCRIP     | SYNAPTOTAGMIN BINDING, CYTOPLASMIC RNA INTERACTING PROTEIN                               |
| 10501   | SEMA6B      | SEMA DOMAIN, TRANSMEMBRANE DOMAIN (TM), AND CYTOPLASMIC DOMAIN, (SEMAPHORIN) 6B          |
| 10528   | NOL5A       | NUCLEOLAR PROTEIN 5A (56KDA WITH KKE/D REPEAT)                                           |
| 10642   | IGF2BP1     | INSULIN-LIKE GROWTH FACTOR 2 MRNA BINDING PROTEIN 1                                      |
| 10849   | CD3EAP      | CD3E ANTIGEN, EPSILON POLYPEPTIDE ASSOCIATED PROTEIN                                     |
| 11140   | CDC37       | CDC37 CELL DIVISION CYCLE 37 HOMOLOG (S. CEREVISIAE)                                     |
| 22919   | MAPRE1      | MICROTUBULE-ASSOCIATED PROTEIN, RP/EB FAMILY, MEMBER 1                                   |

|        |             |                                                                                                                                                      |
|--------|-------------|------------------------------------------------------------------------------------------------------------------------------------------------------|
| 22986  | SORCS3      | SORTILIN-RELATED VPS10 DOMAIN CONTAINING RECEPTOR 3                                                                                                  |
| 23082  | PPRC1       | PEROXISOME PROLIFERATIVE ACTIVATED RECEPTOR, GAMMA, COACTIVATOR-RELATED 1                                                                            |
| 23367  | LARP1       | LA RIBONUCLEOPROTEIN DOMAIN FAMILY, MEMBER 1                                                                                                         |
| 23415  | KCNH4       | POTASSIUM VOLTAGE-GATED CHANNEL, SUBFAMILY H (EAG-RELATED), MEMBER 4                                                                                 |
| 23544  | SEZ6L       | SEIZURE RELATED GENE 6 (MOUSE)-LIKE                                                                                                                  |
| 26135  | SERBP1      | SERPINE1 MRNA BINDING PROTEIN 1                                                                                                                      |
| 27043  | PELP1       | PROLINE, GLUTAMIC ACID AND LEUCINE RICH PROTEIN 1                                                                                                    |
| 27161  | EIF2C2      | EUKARYOTIC TRANSLATION INITIATION FACTOR 2C, 2                                                                                                       |
| 27293  | SMPDL3B     | SPHINGOMYELIN PHOSPHODIESTERASE, ACID-LIKE 3B                                                                                                        |
| 29920  | PYCR2       | PYRROLINE-5-CARBOXYLATE REDUCTASE FAMILY, MEMBER 2                                                                                                   |
| 51303  | FKBP11      | FK506 BINDING PROTEIN 11, 19 KDA                                                                                                                     |
| 51333  | LOC51333    | MESENCHYMAL STEM CELL PROTEIN DSC43                                                                                                                  |
| 51531  | C9ORF156    | CHROMOSOME 9 OPEN READING FRAME 156                                                                                                                  |
| 51621  | KLF13       | KRUPPEL-LIKE FACTOR 13                                                                                                                               |
| 51747  | CROP        | ACID-INDUCIBLE PHOSPHOPROTEIN                                                                                                                        |
| 55234  | SMU1        | SMU-1 SUPPRESSOR OF MEC-8 AND UNC-52 HOMOLOG (C. ELEGANS)                                                                                            |
| 55558  | PLXNA3      | PLEXIN A3                                                                                                                                            |
| 55617  | TASP1       | TASPASE, THREONINE ASPARTASE, 1                                                                                                                      |
| 55760  | DHX32       | HYPOTHETICAL PROTEIN FLJ10694                                                                                                                        |
| 55920  | RCC2        | REGULATOR OF CHROMOSOME CONDENSATION 2                                                                                                               |
| 56895  | AGPAT4      | 1-ACYLGLYCEROL-3-PHOSPHATE O-ACYLTRANSFERASE 4 (LYSOPHOSPHATIDIC ACID ACYLTRANSFERASE, DELTA)                                                        |
| 57597  | BAHCC1      | BAH DOMAIN AND COILED-COIL CONTAINING 1                                                                                                              |
| 57645  | POGK        | POGO TRANSPOSABLE ELEMENT WITH KRAB DOMAIN                                                                                                           |
| 58478  | MASA        | E-1 ENZYME                                                                                                                                           |
| 64377  | CHST8       | CARBOHYDRATE (N-ACETYL GALACTOSAMINE 4-O) SULFOTRANSFERASE 8                                                                                         |
| 64714  | PDIA2       | PROTEIN DISULFIDE ISOMERASE                                                                                                                          |
| 64919  | BCL11B      | B-CELL CLL/LYMPHOMA 11B (ZINC FINGER PROTEIN)                                                                                                        |
| 79012  | CAMKV       | CAM KINASE-LIKE VESICLE-ASSOCIATED                                                                                                                   |
| 79077  | XTP3TPA     | XTP3-TRANSACTIVATED PROTEIN A                                                                                                                        |
| 79663  | HSPBAP1     | HSPB (HEAT SHOCK 27KDA) ASSOCIATED PROTEIN 1                                                                                                         |
| 80323  | CCDC68      | COILED-COIL DOMAIN CONTAINING 68                                                                                                                     |
| 80324  | PUS1        | PSEUDOURIDYLATE SYNTHASE 1                                                                                                                           |
| 81034  | SLC25A32    | SOLUTE CARRIER FAMILY 25, MEMBER 32                                                                                                                  |
| 81579  | PLA2G12A    | PHOSPHOLIPASE A2, GROUP XIIA                                                                                                                         |
| 81890  | QTRT1       | QUEUINE TRNA-RIBOSYLTRANSFERASE 1 (TRNA-GUANINE TRANSGLYCOSYLASE)                                                                                    |
| 83451  | ABHD11      | ABHYDROLASE DOMAIN CONTAINING 11                                                                                                                     |
| 83855  | KLF16       | KRUPPEL-LIKE FACTOR 16                                                                                                                               |
| 84258  | SYT3        | SYNAPTOTAGMIN III                                                                                                                                    |
| 84315  | MON1A       | MON1 HOMOLOG A (YEAST)                                                                                                                               |
| 84872  | ZC3H10      | ZINC FINGER CCCH-TYPE CONTAINING 10                                                                                                                  |
| 84925  | DIRC2       | DISRUPTED IN RENAL CARCINOMA 2                                                                                                                       |
| 85366  | MYLK2       | MYOSIN LIGHT CHAIN KINASE 2, SKELETAL MUSCLE                                                                                                         |
| 90701  | SEC11L3     | SEC11-LIKE 3 (S. CEREVISIAE)                                                                                                                         |
| 90861  | C16ORF34    | HYPOTHETICAL PROTEIN SIMILAR TO MOUSE HN1 (HEMATOLOGICAL AND NEUROLOGICAL EXPRESSED SEQUENCE 1)                                                      |
| 114907 | FBXO32      | F-BOX PROTEIN 32                                                                                                                                     |
| 116844 | LRG1        | LEUCINE-RICH ALPHA-2-GLYCOPROTEIN 1                                                                                                                  |
| 118980 | SFXN2       | SIDEROFLEXIN 2                                                                                                                                       |
| 127733 | UBXD3       | UBX DOMAIN CONTAINING 3                                                                                                                              |
| 134510 | UBLCP1      | UBIQUITIN-LIKE DOMAIN CONTAINING CTD PHOSPHATASE 1                                                                                                   |
| 145741 | NLF1        | NUCLEAR LOCALIZED FACTOR 1                                                                                                                           |
| 168620 | BHLHB8      | BASIC HELIX-LOOP-HELIX DOMAIN CONTAINING, CLASS B, 8                                                                                                 |
| 222967 | LOC222967   | HYPOTHETICAL PROTEIN LOC222967                                                                                                                       |
| 342918 | LOC342918   | HYPOTHETICAL LOC342918                                                                                                                               |
| 388135 | LOC388135   | SIMILAR TO RIKEN CDNA 6030419C18 GENE                                                                                                                |
| 391013 | RP3-340N1.3 | SIMILAR TO GROUP IIC SECRETORY PHOSPHOLIPASE A2 PRECURSOR (PHOSPHATIDYLCHOLINE 2-ACYLHYDROLASE GIIC) (GIIC SPLA2) (PLA2-8) (14 KDA PHOSPHOLIPASE A2) |

## Seo\_Supplemental Figure S10. Functional clustering of PAP-predicted target genes

### A. Functional clusters for Ngn/NeuroD targets

| GO term ID | GO term description                                              | P-value  |
|------------|------------------------------------------------------------------|----------|
| GO:0007399 | nervous system development                                       | 4.43E-13 |
| GO:0030154 | cell differentiation                                             | 3.67E-11 |
| GO:0007169 | transmembrane receptor protein tyrosine kinase signaling pathway | 5.04E-07 |
| GO:0007275 | development                                                      | 4.80E-05 |
| GO:0006468 | protein amino acid phosphorylation                               | 5.26E-05 |
| GO:0008038 | neuron recognition                                               | 6.60E-05 |
| GO:0006813 | potassium ion transport                                          | 1.16E-04 |
| GO:0007219 | Notch signaling pathway                                          | 1.65E-04 |
| GO:0030326 | embryonic limb morphogenesis                                     | 2.25E-04 |
| GO:0001709 | cell fate determination                                          | 3.54E-04 |
| GO:0007155 | cell adhesion                                                    | 5.44E-04 |
| GO:0045786 | negative regulation of progression through cell cycle            | 5.94E-04 |
| GO:0007215 | glutamate signaling pathway                                      | 1.00E-03 |
| GO:0046928 | regulation of neurotransmitter secretion                         | 1.07E-03 |
| GO:0007411 | axon guidance                                                    | 1.18E-03 |
| GO:0009953 | dorsal/ventral pattern formation                                 | 2.11E-03 |
| GO:0050793 | regulation of development                                        | 2.11E-03 |
| GO:0050772 | positive regulation of axonogenesis                              | 2.11E-03 |
| GO:0007417 | central nervous system development                               | 3.21E-03 |
| GO:0007605 | sensory perception of sound                                      | 4.32E-03 |
| GO:0043433 | negative regulation of transcription factor activity             | 5.13E-03 |
| GO:0007223 | frizzled-2 signaling pathway                                     | 7.01E-03 |
| GO:0030097 | Hemopoiesis                                                      | 7.01E-03 |
| GO:0007179 | transforming growth factor beta receptor signaling pathway       | 9.08E-03 |
| GO:0008016 | regulation of heart contraction                                  | 9.08E-03 |
| GO:0005513 | detection of calcium ion                                         | 9.34E-03 |

### B. Functional clusters for E-box (M01034) targets

| GO term ID | GO term description                                                  | P-value  |
|------------|----------------------------------------------------------------------|----------|
| GO:0007275 | development                                                          | 4.07E-06 |
| GO:0045944 | positive regulation of transcription from RNA polymerase II promoter | 1.08E-04 |
| GO:0046685 | response to arsenic                                                  | 3.91E-04 |
| GO:0006350 | transcription                                                        | 3.98E-04 |
| GO:0030520 | estrogen receptor signaling pathway                                  | 5.92E-04 |
| GO:0007223 | frizzled-2 signaling pathway                                         | 6.93E-04 |
| GO:0015986 | ATP synthesis coupled proton transport                               | 1.10E-03 |
| GO:0009953 | Dorsal/ventral pattern formation                                     | 2.29E-03 |
| GO:0015992 | Proton transport                                                     | 3.02E-03 |
| GO:0030154 | cell differentiation                                                 | 3.35E-03 |
| GO:0006366 | transcription from RNA polymerase II promoter                        | 3.45E-03 |
| GO:0006367 | transcription initiation from RNA polymerase II promoter             | 4.39E-03 |
| GO:0006904 | vesicle docking during exocytosis                                    | 5.90E-03 |
| GO:0006836 | neurotransmitter transport                                           | 7.20E-03 |
| GO:0006281 | DNA repair                                                           | 7.69E-03 |
| GO:0030326 | embryonic limb morphogenesis                                         | 7.69E-03 |

### C. Functional clusters for c-Myc/Max (M00118) targets

| GO term ID | GO term description                                                                                             | P-value  |
|------------|-----------------------------------------------------------------------------------------------------------------|----------|
| GO:0007275 | development                                                                                                     | 3.13E-03 |
| GO:0000074 | regulation of progression through cell cycle                                                                    | 4.44E-03 |
| GO:0000083 | G1/S-specific transcription in mitotic cell cycle                                                               | 6.98E-03 |
| GO:0006535 | cysteine biosynthesis from serine                                                                               | 6.98E-03 |
| GO:0006978 | DNA damage response, signal transduction by p53 class mediator resulting in transcription of p21 class mediator | 6.98E-03 |
| GO:0007019 | microtubule depolymerization                                                                                    | 6.98E-03 |
| GO:0030887 | positive regulation of dendritic cell activation                                                                | 6.98E-03 |
| GO:0035162 | embryonic hemopoiesis                                                                                           | 6.98E-03 |
| GO:0042759 | long-chain fatty acid biosynthesis                                                                              | 6.98E-03 |
| GO:0051290 | protein heterotetramerization                                                                                   | 6.98E-03 |
| GO:0046600 | negative regulation of centriole replication                                                                    | 6.98E-03 |
| GO:0043109 | regulation of smoothened activity                                                                               | 6.98E-03 |
| GO:0040015 | negative regulation of body size                                                                                | 6.98E-03 |
| GO:0031115 | negative regulation of microtubule polymerization                                                               | 6.98E-03 |
| GO:0019343 | cysteine biosynthesis via cystathione                                                                           | 6.98E-03 |
| GO:0006163 | Purine nucleotide metabolism                                                                                    | 6.98E-03 |
| GO:0008652 | Amino acid biosynthesis                                                                                         | 9.29E-03 |

**D. Ngn/NeuroD target genes in development/neural development functional clusters**

| <b>Nervous system development (45 Genes)</b> |                                                                                        |
|----------------------------------------------|----------------------------------------------------------------------------------------|
| <b>ENTREZ_GENE_ID</b>                        | <b>Gene name</b>                                                                       |
| 182                                          | JAGGED 1 (ALAGILLE SYNDROME)                                                           |
| 238                                          | ANAPLASTIC LYMPHOMA KINASE (KI-1)                                                      |
| 1131                                         | CHOLINERGIC RECEPTOR, MUSCARINIC 3                                                     |
| 1600                                         | DISABLED HOMOLOG 1 (DROSOPHILA)                                                        |
| 1630                                         | DELETED IN COLORECTAL CARCINOMA                                                        |
| 1641                                         | DOUBLECORTEX; LISSENCEPHALY, X-LINKED (DOUBLECORTIN)                                   |
| 1910                                         | ENDOTHELIN RECEPTOR TYPE B                                                             |
| 2047                                         | EPH RECEPTOR B1                                                                        |
| 2048                                         | EPH RECEPTOR B2                                                                        |
| 2596                                         | GROWTH ASSOCIATED PROTEIN 43                                                           |
| 4010                                         | LIM HOMEBOX TRANSCRIPTION FACTOR 1, BETA                                               |
| 4045                                         | LIMBIC SYSTEM-ASSOCIATED MEMBRANE PROTEIN                                              |
| 4684                                         | NEURAL CELL ADHESION MOLECULE 1                                                        |
| 4692                                         | NECDIN HOMOLOG (MOUSE)                                                                 |
| 4761                                         | NEUROGENIC DIFFERENTIATION 2                                                           |
| 4807                                         | NESCIENT HELIX LOOP HELIX 1                                                            |
| 4808                                         | NESCIENT HELIX LOOP HELIX 2                                                            |
| 4853                                         | NOTCH HOMOLOG 2 (DROSOPHILA)                                                           |
| 4897                                         | NEURONAL CELL ADHESION MOLECULE                                                        |
| 4916                                         | NEUROTROPHIC TYROSINE KINASE, RECEPTOR, TYPE 3                                         |
| 5076                                         | PAIRED BOX GENE 2                                                                      |
| 5087                                         | PRE-B-CELL LEUKEMIA TRANSCRIPTION FACTOR 1                                             |
| 5453                                         | POU DOMAIN, CLASS 3, TRANSCRIPTION FACTOR 1                                            |
| 6091                                         | ROUNDABOUT, AXON GUIDANCE RECEPTOR, HOMOLOG 1 (DROSOPHILA)                             |
| 6586                                         | SLIT HOMOLOG 3 (DROSOPHILA)                                                            |
| 7903                                         | ST8 ALPHA-N-ACETYL-NEURAMINIDE ALPHA-2,8-SIALYLTRANSFERASE 4                           |
| 8326                                         | FRIZZLED HOMOLOG 9 (DROSOPHILA)                                                        |
| 8522                                         | GROWTH ARREST-SPECIFIC 7                                                               |
| 8633                                         | UNC-5 HOMOLOG C (C. ELEGANS)                                                           |
| 8828                                         | NEUROFILIN 2                                                                           |
| 8829                                         | NEUROFILIN 1                                                                           |
| 9353                                         | SLIT HOMOLOG 2 (DROSOPHILA)                                                            |
| 9378                                         | NEUREXIN 1                                                                             |
| 9423                                         | NETRIN 1                                                                               |
| 9839                                         | ZINC FINGER HOMEBOX 1B                                                                 |
| 9935                                         | V-MAF MUSCULOAPONEUROTIC FIBROSARCOMA ONCOGENE HOMOLOG B (AVIAN)                       |
| 10178                                        | ODZ, ODD OZ/TEN-M HOMOLOG 1(DROSOPHILA)                                                |
| 10371                                        | SEMA DOMAIN, IMMUNOGLOBULIN DOMAIN (IG), SHORT BASIC DOMAIN, SECRETED, (SEMAPHORIN) 3A |
| 26280                                        | INTERLEUKIN 1 RECEPTOR ACCESSORY PROTEIN-LIKE 2                                        |
| 26508                                        | HAIRY/ENHANCER-OF-SPLIT RELATED WITH YRPW MOTIF-LIKE                                   |
| 28514                                        | DELTA-LIKE 1 (DROSOPHILA)                                                              |
| 58158                                        | NEUROGENIC DIFFERENTIATION 4                                                           |
| 64211                                        | LIM HOMEBOX 5                                                                          |
| 80031                                        | KIAA1479 PROTEIN                                                                       |
| 146760                                       | RETICULON 4 RECEPTOR-LIKE 1                                                            |

| <b>Development cluster (88 Genes)</b> |                                                                       |
|---------------------------------------|-----------------------------------------------------------------------|
| <b>ENTREZ_GENE_ID</b>                 | <b>Gene name</b>                                                      |
| 182                                   | JAGGED 1 (ALAGILLE SYNDROME)                                          |
| 238                                   | ANAPLASTIC LYMPHOMA KINASE (KI-1)                                     |
| 488                                   | ATPASE, CA++ TRANSPORTING, CARDIAC MUSCLE, SLOW TWITCH 2              |
| 655                                   | BONE MORPHOGENETIC PROTEIN 7 (OSTEOGENIC PROTEIN 1)                   |
| 845                                   | CALSEQUESTRIN 2 (CARDIAC MUSCLE)                                      |
| 863                                   | CORE-BINDING FACTOR, RUNT DOMAIN, ALPHA SUBUNIT 2; TRANSLOCATED TO, 3 |
| 1131                                  | CHOLINERGIC RECEPTOR, MUSCARINIC 3                                    |
| 1295                                  | COLLAGEN, TYPE VIII, ALPHA 1                                          |
| 1523                                  | CUT-LIKE 1, CCAAT DISPLACEMENT PROTEIN (DROSOPHILA)                   |
| 1600                                  | DISABLED HOMOLOG 1 (DROSOPHILA)                                       |
| 1630                                  | DELETED IN COLORECTAL CARCINOMA                                       |
| 1641                                  | DOUBLECORTEX; LISSENCEPHALY, X-LINKED (DOUBLECORTIN)                  |
| 1879                                  | EARLY B-CELL FACTOR                                                   |
| 1896                                  | ECTODYSPLASIN A                                                       |
| 1910                                  | ENDOTHELIN RECEPTOR TYPE B                                            |
| 2047                                  | EPH RECEPTOR B1                                                       |
| 2048                                  | EPH RECEPTOR B2                                                       |
| 2066                                  | V-ERB-A ERYTHROBLASTIC LEUKEMIA VIRAL ONCOGENE HOMOLOG 4 (AVIAN)      |
| 2104                                  | ESTROGEN-RELATED RECEPTOR GAMMA                                       |
| 2138                                  | EYES ABSENT HOMOLOG 1 (DROSOPHILA)                                    |
| 2596                                  | GROWTH ASSOCIATED PROTEIN 43                                          |



|        |                                                                                        |
|--------|----------------------------------------------------------------------------------------|
| 2719   | GLYPICAN 3                                                                             |
| 3397   | INHIBITOR OF DNA BINDING 1, DOMINANT NEGATIVE HELIX-LOOP-HELIX PROTEIN                 |
| 3399   | INHIBITOR OF DNA BINDING 3, DOMINANT NEGATIVE HELIX-LOOP-HELIX PROTEIN                 |
| 3479   | INSULIN-LIKE GROWTH FACTOR 1 (SOMATOMEDIN C)                                           |
| 4010   | LIM HOMEBOX TRANSCRIPTION FACTOR 1, BETA                                               |
| 4045   | LIMBIC SYSTEM-ASSOCIATED MEMBRANE PROTEIN                                              |
| 4209   | MADS BOX TRANSCRIPTION ENHANCER FACTOR 2, POLYPEPTIDE D (MYOCYTE ENHANCER FACTOR 2D)   |
| 4593   | MUSCLE, SKELETAL, RECEPTOR TYROSINE KINASE                                             |
| 4654   | MYOGENIC DIFFERENTIATION 1                                                             |
| 4684   | NEURAL CELL ADHESION MOLECULE 1                                                        |
| 4692   | NECDIN HOMOLOG (MOUSE)                                                                 |
| 4761   | NEUROGENIC DIFFERENTIATION 2                                                           |
| 4807   | NESSCIENT HELIX LOOP HELIX 1                                                           |
| 4808   | NESSCIENT HELIX LOOP HELIX 2                                                           |
| 4851   | NOTCH HOMOLOG 1, TRANSLOCATION-ASSOCIATED (DROSOPHILA)                                 |
| 4853   | NOTCH HOMOLOG 2 (DROSOPHILA)                                                           |
| 4897   | NEURONAL CELL ADHESION MOLECULE                                                        |
| 4916   | NEUROTROPHIC TYROSINE KINASE, RECEPTOR, TYPE 3                                         |
| 5076   | PAIRED BOX GENE 2                                                                      |
| 5087   | PRE-B-CELL LEUKEMIA TRANSCRIPTION FACTOR 1                                             |
| 5362   | PLEXIN A2                                                                              |
| 5453   | POU DOMAIN, CLASS 3, TRANSCRIPTION FACTOR 1                                            |
| 5629   | PROSPERO-RELATED HOMEBOX 1                                                             |
| 5727   | PATCHED HOMOLOG (DROSOPHILA)                                                           |
| 6091   | ROUNDAABOUT, AXON GUIDANCE RECEPTOR, HOMOLOG 1 (DROSOPHILA)                            |
| 6468   | F-BOX AND WD-40 DOMAIN PROTEIN 4                                                       |
| 6586   | SLIT HOMOLOG 3 (DROSOPHILA)                                                            |
| 7090   | TRANSDUCIN-LIKE ENHANCER OF SPLIT 3 (E(SP1) HOMOLOG, DROSOPHILA)                       |
| 7482   | WINGLESS-TYPE MMTV INTEGRATION SITE FAMILY, MEMBER 2B                                  |
| 7483   | WINGLESS-TYPE MMTV INTEGRATION SITE FAMILY, MEMBER 9A                                  |
| 7903   | ST8 ALPHA-N-ACETYL-NEURAMINIDE ALPHA-2,8-SIALYLTRANSFERASE 4                           |
| 8038   | ADAM METALLOPEPTIDASE DOMAIN 12 (MELTRIN ALPHA)                                        |
| 8326   | FRIZZLED HOMOLOG 9 (DROSOPHILA)                                                        |
| 8522   | GROWTH ARREST-SPECIFIC 7                                                               |
| 8633   | UNC-5 HOMOLOG C (C. ELEGANS)                                                           |
| 8828   | NEUROFILIN 2                                                                           |
| 8829   | NEUROFILIN 1                                                                           |
| 8840   | WNT1 INDUCIBLE SIGNALING PATHWAY PROTEIN 1                                             |
| 9353   | SLIT HOMOLOG 2 (DROSOPHILA)                                                            |
| 9378   | NEUREXIN 1                                                                             |
| 9423   | NETRIN 1                                                                               |
| 9555   | H2A HISTONE FAMILY, MEMBER Y                                                           |
| 9839   | ZINC FINGER HOMEBOX 1B                                                                 |
| 9935   | V-MAF MUSCULOAPONEUROTIC FIBROSARCOMA ONCOGENE HOMOLOG B (AVIAN)                       |
| 10178  | ODZ, ODD OZ/TEN-M HOMOLOG 1(DROSOPHILA)                                                |
| 10194  | SEROLOGICALLY DEFINED COLON CANCER ANTIGEN 33                                          |
| 10371  | SEMA DOMAIN, IMMUNOGLOBULIN DOMAIN (IG), SHORT BASIC DOMAIN, SECRETED, (SEMAPHORIN) 3A |
| 10435  | CDC42 EFFECTOR PROTEIN (RHO GTPASE BINDING) 2                                          |
| 10495  | CYTOSOLIC OVARIAN CARCINOMA ANTIGEN 1                                                  |
| 10891  | PEROXISOME PROLIFERATIVE ACTIVATED RECEPTOR, GAMMA, COACTIVATOR 1, ALPHA               |
| 26280  | INTERLEUKIN 1 RECEPTOR ACCESSORY PROTEIN-LIKE 2                                        |
| 26508  | HAIRY/ENHANCER-OF-SPLIT RELATED WITH YRPW MOTIF-LIKE                                   |
| 28514  | DELTA-LIKE 1 (DROSOPHILA)                                                              |
| 54567  | DELTA-LIKE 4 (DROSOPHILA)                                                              |
| 56920  | SEMA DOMAIN, IMMUNOGLOBULIN DOMAIN (IG), SHORT BASIC DOMAIN, SECRETED, (SEMAPHORIN) 3G |
| 57616  | ZINC FINGER PROTEIN 537                                                                |
| 58158  | NEUROGENIC DIFFERENTIATION 4                                                           |
| 63951  | DMRT-LIKE FAMILY A1                                                                    |
| 64211  | LIM HOMEBOX 5                                                                          |
| 64411  | CENTAURIN, DELTA 3                                                                     |
| 79960  | PHD FINGER PROTEIN 17                                                                  |
| 80031  | KIAA1479 PROTEIN                                                                       |
| 80326  | WINGLESS-TYPE MMTV INTEGRATION SITE FAMILY, MEMBER 10A                                 |
| 89796  | HYPOTHETICAL PROTEIN MGC14961                                                          |
| 117154 | DACHSHUND HOMOLOG 2 (DROSOPHILA)                                                       |
| 146760 | RETICULON 4 RECEPTOR-LIKE 1                                                            |
| 200734 | SPROUTY-RELATED, EVH1 DOMAIN CONTAINING 2                                              |

**E. E-box M01034 target genes in top-ranked functional cluster**

| <b>Development cluster (30 genes)</b> |                                                                                 |
|---------------------------------------|---------------------------------------------------------------------------------|
| <b>ENTREZ_GENE_ID</b>                 | <b>Gene name</b>                                                                |
| 1627                                  | DREBRIN 1                                                                       |
| 1952                                  | CADHERIN, EGF LAG SEVEN-PASS G-TYPE RECEPTOR 2 (FLAMINGO HOMOLOG, DROSOPHILA)   |
| 1995                                  | ELAV (EMBRYONIC LETHAL, ABNORMAL VISION, DROSOPHILA)-LIKE 3 (HU ANTIGEN C)      |
| 2251                                  | FIBROBLAST GROWTH FACTOR 6                                                      |
| 3200                                  | HOMEODOMAIN PROTEIN A3                                                          |
| 3203                                  | HOMEODOMAIN PROTEIN A6                                                          |
| 3204                                  | HOMEODOMAIN PROTEIN A7                                                          |
| 3214                                  | HOMEODOMAIN PROTEIN B4                                                          |
| 3217                                  | HOMEODOMAIN PROTEIN B7                                                          |
| 3397                                  | INHIBITOR OF DNA BINDING 1, DOMINANT NEGATIVE HELIX-LOOP-HELIX PROTEIN          |
| 3651                                  | INSULIN PROMOTER FACTOR 1, HOMEODOMAIN TRANSCRIPTION FACTOR                     |
| 4010                                  | LIM HOMEODOMAIN TRANSCRIPTION FACTOR 1, BETA                                    |
| 4760                                  | NEUROGENIC DIFFERENTIATION 1                                                    |
| 4761                                  | NEUROGENIC DIFFERENTIATION 2                                                    |
| 4821                                  | NK2 TRANSCRIPTION FACTOR RELATED, LOCUS 2 (DROSOPHILA)                          |
| 5076                                  | PAIRED BOX GENE 2                                                               |
| 5620                                  | PROTAMINE 2                                                                     |
| 7142                                  | TRANSITION PROTEIN 2 (DURING HISTONE TO PROTAMINE REPLACEMENT)                  |
| 7477                                  | WINGLESS-TYPE MMTV INTEGRATION SITE FAMILY, MEMBER 7B                           |
| 7483                                  | WINGLESS-TYPE MMTV INTEGRATION SITE FAMILY, MEMBER 9A                           |
| 7866                                  | INTERFERON-RELATED DEVELOPMENTAL REGULATOR 2                                    |
| 10501                                 | SEMA DOMAIN, TRANSMEMBRANE DOMAIN (TM), AND CYTOPLASMIC DOMAIN, (SEMAPHORIN) 6B |
| 51043                                 | ZINC FINGER AND BTB DOMAIN CONTAINING 7B                                        |
| 51330                                 | TUMOR NECROSIS FACTOR RECEPTOR SUPERFAMILY, MEMBER 12A                          |
| 54361                                 | WINGLESS-TYPE MMTV INTEGRATION SITE FAMILY, MEMBER 4                            |
| 54567                                 | DELTA-LIKE 4 (DROSOPHILA)                                                       |
| 80326                                 | WINGLESS-TYPE MMTV INTEGRATION SITE FAMILY, MEMBER 10A                          |
| 81693                                 | AMNIONLESS HOMOLOG (MOUSE)                                                      |
| 81848                                 | SPROUTY HOMOLOG 4 (DROSOPHILA)                                                  |
| 145258                                | GOOSECOID                                                                       |

**F. Myc/Max target-genes in top-ranked functional clusters**

| <b>All cell cycle cluster (14 Genes)</b> |                                                        |
|------------------------------------------|--------------------------------------------------------|
| <b>ENTREZ_GENE_ID</b>                    | <b>Gene name</b>                                       |
| 595                                      | CYCLIN D1                                              |
| 672                                      | BREAST CANCER 1, EARLY ONSET                           |
| 2251                                     | FIBROBLAST GROWTH FACTOR 6                             |
| 2354                                     | FBJ MURINE OSTEOSARCOMA VIRAL ONCOGENE HOMOLOG B       |
| 2672                                     | GROWTH FACTOR INDEPENDENT 1                            |
| 3925                                     | STATHMIN 1/ONCOPROTEIN 18                              |
| 4831                                     | NON-METASTATIC CELLS 2, PROTEIN (NM23B) EXPRESSED IN   |
| 4893                                     | V-HA-RAS HARVEY RAT SARCOMA VIRAL ONCOGENE HOMOLOG     |
| 5536                                     | PROTEIN PHOSPHATASE 5, CATALYTIC SUBUNIT               |
| 5727                                     | PATCHED HOMOLOG (DROSOPHILA)                           |
| 5757                                     | PROTHYMOSIN, ALPHA (GENE SEQUENCE 28)                  |
| 11140                                    | CDC37 CELL DIVISION CYCLE 37 HOMOLOG (S. CEREVISIAE)   |
| 22919                                    | MICROTUBULE-ASSOCIATED PROTEIN, RP/EB FAMILY, MEMBER 1 |
| 55920                                    | REGULATOR OF CHROMOSOME CONDENSATION 2                 |

| <b>Development cluster (8 Genes)</b> |                                                                                  |
|--------------------------------------|----------------------------------------------------------------------------------|
| <b>ENTREZ_GENE_ID</b>                | <b>Gene name</b>                                                                 |
| 1995                                 | ELAV (EMBRYONIC LETHAL, ABNORMAL VISION, DROSOPHILA)-LIKE 3 (HU ANTIGEN C)       |
| 2251                                 | FIBROBLAST GROWTH FACTOR 6                                                       |
| 3231                                 | HOMEODOMAIN PROTEIN D1                                                           |
| 3232                                 | HOMEODOMAIN PROTEIN D3                                                           |
| 7291                                 | TWIST HOMOLOG 1 (ACROCEPHALOSYNDACTYLY 3; SAETHRE-CHOTZEN SYNDROME) (DROSOPHILA) |
| 8324                                 | FRIZZLED HOMOLOG 7 (DROSOPHILA)                                                  |
| 10501                                | SEMA DOMAIN, TRANSMEMBRANE DOMAIN (TM), AND CYTOPLASMIC DOMAIN, (SEMAPHORIN) 6B  |
| 57645                                | POGO TRANSPOSABLE ELEMENT WITH KRAB DOMAIN                                       |
